# Supplementary material
Source: PubMed Central journal article supplement (PMC9531071)
Supplement: jamaneurol-e223094-s001.pdf [file jamaneurol-e223094-s001.pdf]

## Supplementary Online Content

Alothman D, Card T, Lewis S, Tyrrell E, Fogarty AW, Marshall CR. Risk of suicide after dementia diagnosis. *JAMA Neurol*. Published online October 3, 2022.  
doi:10.1001/jamaneurol.2022.3094

### **eAppendix 1.** Records of Dementia

**eTable 1.** Read Terms and Codes for Dementia diagnosis in CPRD GOLD

**eTable 2.** Medical Code IDs and Terms for Dementia Diagnosis in CPRD Aurum

**eTable 3.** *ICD-10* Codes and Terms Used for Dementia Diagnosis in HES

**eTable 4.** Validity of Dementia Diagnoses in Clinical Practice Research Datalink

### **eAppendix 2.** Records of Psychiatric Illnesses

**eTable 5.** Read Terms and Codes Used for Identifying Psychiatric Illnesses in CPRD GOLD

**eTable 6.** Medical Code IDs and Terms Used for Identifying Psychiatric Illnesses in CPRD Aurum

**eTable 7.** *ICD-10* Codes and Categories Used for Identifying Psychiatric Illnesses in HES

This supplementary material has been provided by the authors to give readers additional information about their work.

## eAppendix 1. Records of Dementia

The full lists of dementia terms and codes used in our study are available in eTable 1 and eTable 2 below for Clinical Practice Research Datalink (CPRD) GOLD and CPRD Aurum, respectively. eTable 3 lists the International Statistical Classification of Diseases and Related Health Problems 10<sup>th</sup> version (ICD-10) codes and terms used for identifying dementia diagnosis in Hospital Episode Statistics (HES). This code list for identifying dementia diagnosis was reviewed and approved by Charles Marshall, an expert in dementia management.

Dementia diagnosis records in CPRD were validated by Walker et.al (2018) using HES and ONS as the reference standards<sup>1</sup>. The result of their work is summarised in eTable 4 below. Specificity was high, but sensitivity was modest. The accuracy of those records will have increased further by additional ascertainment of dementia from secondary care data<sup>2,3</sup>.

- 
1. Walker VM, Davies NM, Kehoe PG, Martin RM. What is the impact of regulatory guidance and expiry of drug patents on dementia drug prescriptions in England? A trend analysis in the Clinical Practice Research Datalink. *Alzheimer's Research & Therapy*. 2018;10(1):51. doi:10.1186/s13195-018-0379-6
  2. Padmanabhan S, Carty L, Cameron E, Ghosh RE, Williams R, Strongman H. Approach to record linkage of primary care data from Clinical Practice Research Datalink to other health-related patient data: overview and implications. *European Journal of Epidemiology*. 2019;34(1):91-99. doi:10.1007/s10654-018-0442-4
  3. Sibbett RA, Russ TC, Deary IJ, Starr JM. Dementia ascertainment using existing data in UK longitudinal and cohort studies: a systematic review of methodology. *BMC Psychiatry*. 2017;17(1):239. doi:10.1186/s12888-017-1401-4

**eTable 1.** Read Terms and Codes for Dementia diagnosis in CPRD GOLD

| Term                                                         | Read Code |                                                              |         |
|--------------------------------------------------------------|-----------|--------------------------------------------------------------|---------|
| H/O: dementia                                                | 1461.00   | [X]Dementia in Alzheimer's disease, unspecified              | Eu00z00 |
| Dementia monitoring                                          | 66h..00   | [X]Alzheimer's dementia unspec                               | Eu00z11 |
| Dementia annual review                                       | 6AB..00   | [X]Vascular dementia                                         | Eu01.00 |
| Dementia medication review                                   | 8BM0200   | [X]Arteriosclerotic dementia                                 | Eu01.11 |
| Antipsychotic drug therapy for dementia                      | 8BPa.00   | [X]Vascular dementia of acute onset                          | Eu01000 |
| Dementia monitoring administration                           | 9Ou..00   | [X]Multi-infarct dementia                                    | Eu01100 |
| Dementia monitoring first letter                             | 9Ou1.00   | [X]Predominantly cortical dementia                           | Eu01111 |
| Dementia monitoring second letter                            | 9Ou2.00   | [X]Subcortical vascular dementia                             | Eu01200 |
| Dementia monitoring third letter                             | 9Ou3.00   | [X]Mixed cortical and subcortical vascular dementia          | Eu01300 |
| Senile and presenile organic psychotic conditions            | E00..00   | [X]Other vascular dementia                                   | Eu01y00 |
| Senile dementia                                              | E00..11   | [X]Vascular dementia, unspecified                            | Eu01z00 |
| Senile/presenile dementia                                    | E00..12   | [X]Dementia in other diseases classified elsewhere           | Eu02.00 |
| Uncomplicated senile dementia                                | E000.00   | [X]Dementia in Pick's disease                                | Eu02000 |
| Presenile dementia                                           | E001.00   | [X]Dementia in Creutzfeldt-Jakob disease                     | Eu02100 |
| Uncomplicated presenile dementia                             | E001000   | [X]Dementia in Huntington's disease                          | Eu02200 |
| Presenile dementia with delirium                             | E001100   | [X]Dementia in Parkinson's disease                           | Eu02300 |
| Presenile dementia with paranoia                             | E001200   | [X]Dementia in human immunodeficiency virus [HIV] disease    | Eu02400 |
| Presenile dementia with depression                           | E001300   | [X]Lewy body dementia                                        | Eu02500 |
| Presenile dementia NOS                                       | E001z00   | [X]Dementia in other specified diseases classified elsewhere | Eu02y00 |
| Senile dementia with depressive or paranoid features         | E002.00   | [X] Unspecified dementia                                     | Eu02z00 |
| Senile dementia with paranoia                                | E002000   | [X] Presenile dementia NOS                                   | Eu02z11 |
| Senile dementia with depression                              | E002100   | [X] Primary degenerative dementia NOS                        | Eu02z13 |
| Senile dementia with depressive or paranoid features NOS     | E002z00   | [X] Senile dementia NOS                                      | Eu02z14 |
| Senile dementia with delirium                                | E003.00   | [X] Senile dementia, depressed or paranoid type              | Eu02z16 |
| Arteriosclerotic dementia                                    | E004.00   | [X]Delirium superimposed on dementia                         | Eu04100 |
| Multi infarct dementia                                       | E004.11   | [X]Alcoholic dementia NOS                                    | Eu10711 |
| Uncomplicated arteriosclerotic dementia                      | E004000   | [X]Dementia infantilis                                       | Eu84311 |
| Arteriosclerotic dementia with delirium                      | E004100   | Other cerebral degenerations                                 | F11..00 |
| Arteriosclerotic dementia with paranoia                      | E004200   | Alzheimer's disease                                          | F110.00 |
| Arteriosclerotic dementia with depression                    | E004300   | Alzheimer's disease with early onset                         | F110000 |
| Arteriosclerotic dementia NOS                                | E004z00   | Alzheimer's disease with late onset                          | F110100 |
| Other alcoholic dementia                                     | E012.00   | Pick's disease                                               | F111.00 |
| Alcoholic dementia NOS                                       | E012.11   | Senile degeneration of brain                                 | F112.00 |
| Drug-induced dementia                                        | E02y100   | Lewy body disease                                            | F116.00 |
| Dementia in conditions EC                                    | E041.00   | Frontotemporal degeneration                                  | F118.00 |
| [X]Dementia in Alzheimer's disease                           | Eu00.00   | Cerebral degeneration due to alcoholism                      | F11x000 |
| [X]Dementia in Alzheimer's disease with early onset          | Eu00000   | Cerebral degeneration due to cerebrovascular disease         | F11x200 |
| [X]Presenile dementia, Alzheimer's type                      | Eu00011   | Cerebral degeneration due to Jakob - Creutzfeldt disease     | F11x700 |
| [X]Primary degen dementia, Alzheimer's type, presenile onset | Eu00012   | Cerebral degeneration in Parkinson's disease                 | F11x900 |
| [X]Alzheimer's disease type 2                                | Eu00013   | Cerebral degeneration NOS                                    | F11z.00 |
| [X]Dementia in Alzheimer's disease with late onset           | Eu00100   | [X]Other Alzheimer's disease                                 | Fyu3000 |
| [X]Alzheimer's disease type 1                                | Eu00111   | Alzheimer's disease assessment scale                         | ZR1K.00 |
| [X]Senile dementia, Alzheimer's type                         | Eu00112   | ADAS - Alzheimer's disease assessment scale                  | ZR1K.11 |
| [X]Primary degen dementia of Alzheimer's type, senile onset  | Eu00113   | Language disorder of dementia                                | ZS7C500 |
| [X]Dementia in Alzheimer's dis, atypical or mixed type       | Eu00200   |                                                              |         |

**eTable 2.** Medical Code IDs and Terms for Dementia Diagnosis in CPRD Aurum

| Term                                                                                          | Medical Code ID   |  |                                                                                                  |
|-----------------------------------------------------------------------------------------------|-------------------|--|--------------------------------------------------------------------------------------------------|
| Binswanger's encephalopathy                                                                   | 1235534016        |  | Unspecified dementia, other symptoms, predominantly delusional                                   |
| QOF (Quality and Outcomes Framework) dementia quality indicator-related care invitation       | 12626321000006119 |  | Unspecified dementia, other symptoms, predominantly hallucinatory                                |
| Cerebral degeneration other disease NOS                                                       | 12724061000006112 |  | Unspecified dementia, other symptoms, predominantly depressive                                   |
| Cerebral degeneration NOS                                                                     | 12725821000006112 |  | Unspecified dementia, other mixed symptoms                                                       |
| Senile/presenile dementia                                                                     | 148381000006115   |  | Dementia in Alzheimer's disease with early onset, other symptoms, predominantly depressive       |
| Binswanger's disease                                                                          | 149347010         |  | Dementia in Alzheimer's disease with early onset, other mixed symptoms                           |
| Cause of Death- Alzheimer'S Disease                                                           | 1576281000006119  |  | Dementia in Alzheimer's disease with late onset, without additional symptoms                     |
| Variant Creutzfeldt-Jakob disease                                                             | 1805751000006115  |  | Dementia in Alzheimer's disease with late onset, other symptoms, predominantly delusional        |
| Dementia confirmed                                                                            | 1823871000006112  |  | Dementia in Alzheimer's disease with late onset, other symptoms, predominantly hallucinatory     |
| Dementia care plan                                                                            | 1834091000006117  |  | Dementia in Alzheimer's disease with late onset, other symptoms, predominantly depressive        |
| Dementia monitoring in primary care                                                           | 1856601000006111  |  | Dementia in Alzheimer's disease with late onset, other mixed symptoms                            |
| Dementia monitoring in secondary care                                                         | 1856611000006114  |  | Dementia in Alzheimer's dis, atypical or mixed type, without additional symptoms                 |
| Did not attend dementia monitoring                                                            | 1856631000006115  |  | Dementia in Alzheimer's dis, atypical or mixed type, other symptoms, predominantly hallucinatory |
| Dementia screening questionnaire declined                                                     | 1876351000006115  |  | Dementia in Alzheimer's dis, atypical or mixed type, other symptoms, predominantly depressive    |
| Sporadic Creutzfeldt-Jakob disease                                                            | 1897891000006114  |  | Dementia in Alzheimer's disease with late onset, other mixed symptoms                            |
| Dementia medication review                                                                    | 1916981000006111  |  | Dementia in Alzheimer's disease with late onset, other symptoms, predominantly depressive        |
| Dementia stage at diagnosis                                                                   | 1949621000006118  |  | Dementia in Alzheimer's disease with late onset, other mixed symptoms                            |
| Dementia stage at diagnosis - early (mild)                                                    | 1949631000006115  |  | Dementia in Alzheimer's disease with late onset, other mixed symptoms                            |
| Dementia stage at diagnosis - mid (moderate)                                                  | 1949641000006113  |  | Dementia in Alzheimer's disease with late onset, other mixed symptoms                            |
| Dementia stage at diagnosis - late (severe)                                                   | 1949651000006110  |  | Dementia in Alzheimer's disease with late onset, other mixed symptoms                            |
| Dementia stage at diagnosis - undetermined                                                    | 1949661000006112  |  | Dementia in Alzheimer's disease with late onset, other mixed symptoms                            |
| Dementia stage at diagnosis - not known                                                       | 1949671000006117  |  | Dementia in Alzheimer's disease with late onset, other mixed symptoms                            |
| Dementia in Alzheimer's disease with early onset, without additional symptoms                 | 1971401000006111  |  | Dementia in Alzheimer's disease with late onset, other mixed symptoms                            |
| Dementia in Alzheimer's disease with early onset, other symptoms, predominantly delusional    | 1971541000006114  |  | Dementia in Alzheimer's disease with late onset, other mixed symptoms                            |
| Mental & behav dis due to seds/hypntcs: resid & late-onset psychot dis, dementia              | 1971661000006114  |  | Dementia in Alzheimer's disease with late onset, other mixed symptoms                            |
| Mental & behav dis due to use opioids: resid & late-onset psychot dis, dementia               | 1971701000006118  |  | Dementia in Alzheimer's disease with late onset, other mixed symptoms                            |
| Dementia in Alzheimer's disease with early onset, other symptoms, predominantly hallucinatory | 1971771000006112  |  | Dementia in Alzheimer's disease with late onset, other mixed symptoms                            |
| Unspecified dementia, without additional symptoms                                             | 1972021000006119  |  | Dementia in Alzheimer's disease, unspecified, without additional symptoms                        |
|                                                                                               |                   |  | Dementia in Alzheimer's disease, unspecified, other symptoms, predominantly delusional           |

|                                                                                            |                  |                                                                                                   |                  |
|--------------------------------------------------------------------------------------------|------------------|---------------------------------------------------------------------------------------------------|------------------|
| Dementia in Alzheimer's disease, unspecified, other symptoms, predominantly hallucinatory  | 1972421000006110 | Mixed cortical and subcortical vascular dementia, other symptoms, predominantly hallucinatory     | 1972871000006113 |
| Mental & behav dis due to cannabinoids: resid & late-onset psychot dis, dementia           | 1972431000006113 | Mixed cortical and subcortical vascular dementia, other symptoms, predominantly depressive        | 1972911000006111 |
| Dementia in Alzheimer's disease, unspecified, other symptoms, predominantly depressive     | 1972451000006118 | Mixed cortical and subcortical vascular dementia, other mixed symptoms                            | 1972931000006117 |
| Dementia in Alzheimer's disease, unspecified, other mixed symptoms                         | 1972471000006111 | Mental and behav dis due to vol solvents: resid & late-onset psychotic dis, dementia              | 1973171000006112 |
| Vascular dementia of acute onset, without additional symptoms                              | 1972481000006114 | Other vascular dementia, without additional symptoms                                              | 1973221000006118 |
| Vascular dementia of acute onset, other symptoms, predominantly delusional                 | 1972501000006116 | Other vascular dementia, other symptoms, predominantly delusional                                 | 1973271000006117 |
| Vascular dementia of acute onset, other symptoms, predominantly hallucinatory              | 1972521000006114 | Other vascular dementia, other symptoms, predominantly hallucinatory                              | 1973341000006118 |
| Vascular dementia of acute onset, other symptoms, predominantly depressive                 | 1972541000006119 | Other vascular dementia, other symptoms, predominantly depressive                                 | 1973381000006112 |
| Vascular dementia of acute onset, other mixed symptoms                                     | 1972571000006110 | Other vascular dementia, other mixed symptoms                                                     | 1973401000006112 |
| Multi-infarct dementia, without additional symptoms                                        | 1972601000006115 | Vascular dementia, unspecified, without additional symptoms                                       | 1973461000006113 |
| Multi-infarct dementia, other symptoms, predominantly delusional                           | 1972621000006113 | Vascular dementia, unspecified, other symptoms, predominantly delusional                          | 1973501000006113 |
| Multi-infarct dementia, other symptoms, predominantly hallucinatory                        | 1972641000006118 | Vascular dementia, unspecified, other symptoms, predominantly hallucinatory                       | 1973531000006117 |
| Multi-infarct dementia, other symptoms, predominantly depressive                           | 1972661000006119 | Vascular dementia, unspecified, other symptoms, predominantly depressive                          | 1973551000006112 |
| Multi-infarct dementia, other mixed symptoms                                               | 1972681000006112 | Mental and behav dis due to hallucinogens: resid & late-onset psychot dis, dementia               | 1973711000006116 |
| Subcortical vascular dementia, without additional symptoms                                 | 1972711000006113 | Mental & behav dis due to use cocaine: resid & late-onset psychot dis, dementia                   | 1973941000006119 |
| Subcortical vascular dementia, other symptoms, predominantly delusional                    | 1972731000006119 | Mental and behav dis mlti drg use/oth psych subs: resid/late psychot dis, dementia                | 1974271000006119 |
| Subcortical vascular dementia, other symptoms, predominantly hallucinatory                 | 1972751000006114 | Mental & behav dis due to tobacco: resid & late-onset psychot dis, dementia                       | 1974931000006114 |
| Subcortical vascular dementia, other symptoms, predominantly depressive                    | 1972771000006116 | Mental & behav dis due to use alcohol: resid & late-onset psychot dis, dementia                   | 1975591000006119 |
| Subcortical vascular dementia, other mixed symptoms                                        | 1972791000006115 | Mental and behav dis due to other stimulants inc caffeine: resid/late-onset psychot dis, dementia | 1976091000006118 |
| Mixed cortical and subcortical vascular dementia, without additional symptoms              | 1972821000006112 |                                                                                                   |                  |
| Mixed cortical and subcortical vascular dementia, other symptoms, predominantly delusional | 1972831000006110 |                                                                                                   |                  |

|                                                             |                  |                                                           |                  |
|-------------------------------------------------------------|------------------|-----------------------------------------------------------|------------------|
| Vascular dementia, unspecified, other mixed symptoms        | 1976831000006111 | Senile dementia with depression                           | 294646011        |
| Presenile dementia                                          | 21256010         | Senile dementia with depressive or paranoid features NOS  | 294647019        |
| Pick's disease                                              | 22408016         | Senile dementia with delirium                             | 294648012        |
| Dementia care plan                                          | 2248021000000110 | Uncomplicated arteriosclerotic dementia                   | 294652012        |
| Antipsychotic drug therapy for dementia                     | 2290431000000110 | Arteriosclerotic dementia with delirium                   | 294653019        |
| Sporadic Creutzfeldt-Jakob disease                          | 2366171000000112 | Arteriosclerotic dementia with paranoia                   | 294654013        |
| Sporadic CJD (Creutzfeldt-Jakob disease)                    | 2366181000000114 | Arteriosclerotic dementia with depression                 | 294655014        |
| Jakob-Creutzfeldt disease                                   | 2386018          | Arteriosclerotic dementia NOS                             | 294656010        |
| Dementia medication review                                  | 2403101000000116 | Drug-induced dementia                                     | 294688019        |
| Dementia care plan agreed                                   | 2439591000000113 | Dementia in conditions EC                                 | 294718018        |
| Dementia care plan reviewed                                 | 2439631000000113 | [X]Dementia in Alzheimer's disease                        | 295668011        |
| Dementia care plan declined                                 | 2439671000000110 | [X]Dementia in Alzheimer's dis, atypical or mixed type    | 295671015        |
| Dementia care plan review declined                          | 2439711000000111 | [X]Dementia in Alzheimer's disease, unspecified           | 295672010        |
| Dementia associated with alcoholism                         | 2502971000006115 | [X]Other vascular dementia                                | 295680015        |
| Alcohol-induced persisting dementia                         | 2502981000006117 | [X]Vascular dementia, unspecified                         | 295681016        |
| Creutzfeldt-Jakob disease                                   | 2510951000006114 | [X]Dementia in other diseases classified elsewhere        | 295684012        |
| Subacute spongiform encephalopathy                          | 2510971000006116 | [X]Dementia in Pick's disease                             | 295685013        |
| CJD - Creutzfeldt-Jakob disease                             | 2510981000006118 | [X]Dementia in Creutzfeldt-Jakob disease                  | 295686014        |
| JCD - Jakob-Creutzfeldt disease                             | 2510991000006115 | [X]Dementia in Huntington's disease                       | 295687017        |
| Transmissible virus dementia                                | 2511001000006119 | [X]Dementia in Parkinson's disease                        | 295688010        |
| Creutzfeldt Jakob disease                                   | 2511011000006116 | [X]Dementia in other specified diseases classif elsewhere | 295690011        |
| H/O: dementia                                               | 251625013        | [X]Delirium superimposed on dementia                      | 295714013        |
| Senile dementia                                             | 26545010         | Nuchal dystonia-dementia syndrome                         | 2966081000006114 |
| Circumscribed cerebral atrophy                              | 2707651000006116 | Cerebral degeneration in disease NOS                      | 296996011        |
| Pick disease                                                | 2707661000006119 | Other cerebral degenerations                              | 297000018        |
| Picks disease                                               | 2707671000006114 | Cerebral degeneration due to cerebrovascular disease      | 297013012        |
| SD - Senile dementia                                        | 2748441000006111 | Cerebral degeneration other disease NOS                   | 297022013        |
| AD - Alzheimer's disease                                    | 2931231000006118 | Other cerebral degeneration NOS                           | 297025010        |
| Alzheimer disease                                           | 2931241000006111 | [X]Other Alzheimer's disease                              | 299325013        |
| Alzheimer dementia                                          | 2931251000006113 | [X]Lewy body dementia                                     | 299641000000112  |
| Exception reporting: dementia quality indicators            | 294111000000119  | Age-related degeneration of brain                         | 3240651000006113 |
| Excepted from dementia quality indicators: Informed dissent | 294321000000111  | General paresis                                           | 3341631000006115 |
| Uncomplicated senile dementia                               | 294635013        | Dementia paralytica                                       | 3341641000006113 |
| Uncomplicated presenile dementia                            | 294637017        | Paretic neurosyphilis                                     | 3341661000006112 |
| Presenile dementia with delirium                            | 294638010        |                                                           |                  |
| Presenile dementia with paranoia                            | 294641018        |                                                           |                  |
| Presenile dementia with depression                          | 294642013        |                                                           |                  |
| Presenile dementia NOS                                      | 294643015        |                                                           |                  |
| Senile dementia with depressive or paranoid features        | 294644014        |                                                           |                  |
| Senile dementia with paranoia                               | 294645010        |                                                           |                  |

|                                                     |                  |                                                                      |                  |
|-----------------------------------------------------|------------------|----------------------------------------------------------------------|------------------|
| General paresis of the insane                       | 3341671000006117 | Dementia monitoring first letter                                     | 408361000000111  |
| GPI - General paresis of the insane                 | 3341681000006119 | Dementia annual review                                               | 408401000000119  |
| Paralytic dementia                                  | 3341701000006116 | Dementia monitoring second letter                                    | 408421000000111  |
| Organic dementia                                    | 3350441000006115 | Dementia monitoring third letter                                     | 408461000000115  |
| MID - Multi-infarct dementia                        | 3414231000006117 | Dementia monitoring verbal invite                                    | 408481000000112  |
| VAD - Vascular dementia                             | 3414251000006112 | Dementia monitoring telephone invite                                 | 408501000000115  |
| Multi infarct dementia                              | 3414261000006114 | [X]Predominantly cortical dementia                                   | 423221000006117  |
| Frontotemporal degeneration                         | 345092016        | [X]Presenile dementia,Alzheimer's type                               | 423351000006115  |
| Alcoholic dementia NOS                              | 346929012        | [X]Primary degen dementia of Alzheimer's type, senile onset          | 423381000006111  |
| Other cerebral degeneration                         | 35741000006114   | [X]Primary degen dementia, Alzheimer's type, presenile onset         | 423391000006114  |
| [X] Presenile dementia NOS                          | 359081000006118  | [X]Senile dementia,Alzheimer's type                                  | 425901000006116  |
| [X] Primary degenerative dementia NOS               | 359101000006114  | [X]Subcortical vascular dementia                                     | 428201000006119  |
| [X] Senile dementia NOS                             | 359141000006111  | [X]Vascular dementia                                                 | 431681000006117  |
| [X] Senile dementia, depressed or paranoid type     | 359151000006113  | [X]Vascular dementia of acute onset                                  | 431691000006119  |
| [X] Unspecified dementia                            | 359241000006119  | Alzheimer's disease                                                  | 45046017         |
| [X]Alcoholic dementia NOS                           | 362941000006113  | History of dementia                                                  | 4539871000006116 |
| [X]Alzheimer's dementia unspec                      | 363021000006113  | Senile delirium                                                      | 4763081000006118 |
| [X]Alzheimer's disease type 1                       | 363031000006111  | Cerebral degeneration due to Creutzfeldt-Jakob disease               | 4768981000006114 |
| [X]Alzheimer's disease type 2                       | 363041000006118  | Senile degenerative atrophy                                          | 4806761000006118 |
| [X]Arteriosclerotic dementia                        | 363791000006112  | General paralysis of insane                                          | 496157019        |
| [X]Chronic alcoholic brain syndrome                 | 370961000006119  | General paresis - neurosyphilis                                      | 496158012        |
| [X]Dementia in Alzheimer's disease with early onset | 376531000006119  | Arteriosclerotic dementia                                            | 497559016        |
| [X]Dementia in Alzheimer's disease with late onset  | 376541000006112  | Alzheimer's disease with early onset                                 | 499946014        |
| [X]Dementia in human immunodef virus [HIV] disease  | 376571000006116  | Alzheimer's disease with late onset                                  | 500317011        |
| Lewy body variant of Alzheimer's disease            | 3802621000006119 | Cerebral degeneration due to alcoholism                              | 542611000006114  |
| SDLT - Senile dementia of the Lewy body type        | 3802631000006116 | Cerebral degeneration due to Jakob - Creutzfeldt disease             | 542651000006110  |
| LBD - Lewy body disease                             | 3802641000006114 | nvCJD - New variant of Creutzfeldt-Jakob disease                     | 5931631000006119 |
| Dementia of the Lewy body type                      | 3802651000006111 | vCJD - variant Creutzfeldt-Jakob disease                             | 5931641000006112 |
| DLBD - Diffuse Lewy body disease                    | 3802661000006113 | Creutzfeldt-Jakob variant disease                                    | 5931651000006114 |
| Cortical Lewy body disease                          | 3802671000006118 | Cerebral degeneration in Parkinson's disease                         | 636681000000117  |
| CLBD - Cortical Lewy body disease                   | 3802681000006115 | Primary degenerative dementia of the Alzheimer type, presenile onset | 6897211000006117 |
| Binswanger's dementia                               | 3964611000006111 | Primary degenerative dementia of the Alzheimer type, early onset     | 6897221000006113 |
| Subcortical arteriosclerotic encephalopathy         | 3964651000006112 | Dementia of the Alzheimers type with early onset                     | 6897241000006118 |
| Subcortical atherosclerotic dementia                | 3964661000006114 | Presenile dementia, Alzheimer's type                                 | 6897251000006116 |
| Chronic progressive subcortical encephalopathy      | 3964671000006119 |                                                                      |                  |
| [X]Mixed cortical and subcortical vascular dementia | 398571000006112  |                                                                      |                  |
| [X]Multi-infarct dementia                           | 399031000006111  |                                                                      |                  |
| Senile and presenile organic psychotic conditions   | 401757012        |                                                                      |                  |
| Other alcoholic dementia                            | 401760017        |                                                                      |                  |
| Dementia monitoring                                 | 407461000000119  |                                                                      |                  |

|                                                                   |                  |                                                 |                  |
|-------------------------------------------------------------------|------------------|-------------------------------------------------|------------------|
| Dementia in Alzheimer's disease - type 2                          | 6897271000006114 | Dementia due to Huntington disease              | 7263011000006112 |
| Primary degenerative dementia of the Alzheimer type, senile onset | 6900181000006114 | Dementia due to Huntingtons disease             | 7263021000006116 |
| Primary degenerative dementia of the Alzheimer type, late onset   | 6900191000006112 | Lewy body disease                               | 745381000006119  |
| Dementia of the Alzheimers type, late onset                       | 6900201000006110 | Senile degeneration of brain                    | 76484016         |
| SDAT - Senile dementia, Alzheimer's type                          | 6900221000006117 | Sporadic Jakob-Creutzfeldt disease              | 7699251000006118 |
| Dementia in Alzheimer's disease - type 1                          | 6900241000006112 | Dementia due to Picks disease                   | 8009521000006114 |
| Multi infarct dementia                                            | 696161000006115  | Dementia due to Pick disease                    | 8009531000006112 |
| Dementia associated with AIDS                                     | 6973421000006116 | Dementia co-occurrent and due to Pick's disease | 8009541000006119 |
| Acquired immune deficiency syndrome-related dementia              | 6973431000006118 | Dementia                                        | 882171000006115  |
| AIDS - Acquired immune deficiency syndrome dementia complex       | 6973441000006111 | Other senile/presenile dement.                  | 882181000006117  |
| ADC - Acquired immune deficiency syndrome dementia complex        | 6973451000006113 | Senile and presenile dementias                  | 882191000006119  |
| Acquired immune deficiency syndrome dementia complex              | 6973461000006110 | Senile dementia - simple type                   | 882201000006116  |
| Dementia associated with acquired immunodeficiency syndrome       | 6973471000006115 | Senile dementia-acute confused                  | 882211000006118  |
| Dementia associated with Parkinson's Disease                      | 7043651000006119 | Senile brain degeneration                       | 882941000006113  |
| Dementia associated with Parkinson Disease                        | 7043661000006117 | Cerebral degenerations NOS                      | 882951000006110  |
| Dementia due to Creutzfeldt-Jakob disease                         | 7103601000006116 | [RFC] Alzheimer's disease                       | 905791000006115  |
|                                                                   |                  | [D] Vascular dementia                           | 914921000006117  |
|                                                                   |                  | [D] Dementia with Lewy bodies                   | 914931000006119  |
|                                                                   |                  | [D] Dementia                                    | 914941000006112  |
|                                                                   |                  | [D] Dementia in Alzheimer's disease             | 914951000006114  |
|                                                                   |                  | Dementia review                                 | 915111000006112  |
|                                                                   |                  | [RFC] Dementia                                  | 939491000006118  |



**eTable 3. ICD-10 Codes and Terms Used for Dementia Diagnosis in HES**

| Term                                                                        | ICD-10 code |  |                                                                                 |
|-----------------------------------------------------------------------------|-------------|--|---------------------------------------------------------------------------------|
| Vascular dementia.                                                          | F01.5       |  | Progressive vascular leukoencephalopathy                                        |
| Dementia in Alzheimer disease with late onset                               | F00.1       |  | Dementia in Huntington's disease                                                |
| Dementia in other diseases classified elsewhere with behavioral disturbance | F02.81      |  | Huntington's Disease                                                            |
| Circumscribed brain atrophy                                                 | G31.0       |  | Other specified degenerative diseases of nervous system                         |
| Vascular dementia without behavioral disturbance                            | F01.50      |  | Dementia in other diseases classified elsewhere without behavioral disturbance. |
| Other frontotemporal dementia.                                              | G31.09      |  | Dementia in human immunodeficiency virus [HIV] disease                          |
| Subcortical vascular dementia                                               | F01.2       |  | Alzheimer's disease.                                                            |
| Dementia in Alzheimer's disease, atypical or mixed type                     | F00.2       |  | Multi-infarct dementia                                                          |
| Creutzfeldt-Jakob disease                                                   | A81.0       |  | Vascular dementia                                                               |
| Dementia in Parkinson's disease                                             | F02.3       |  | Vascular dementia of acute onset                                                |
| Dementia in Alzheimer's disease, unspecified                                | F00.9       |  | Delirium superimposed on dementia                                               |
| Dementia with Lewy Bodies                                                   | G31.83      |  | Senile degeneration of brain, not elsewhere classified.                         |
| Other vascular dementia                                                     | F01.8       |  | Unspecified dementia                                                            |
| Dementia in Pick's disease                                                  | F02.0       |  |                                                                                 |
| Alzheimer's disease with late onset                                         | G30.1       |  |                                                                                 |
| Other Alzheimer's disease.                                                  | G30.8       |  |                                                                                 |
| Dementia in Alzheimer's disease                                             | F00         |  |                                                                                 |
| Alzheimer's disease, unspecified                                            | G30.9       |  |                                                                                 |
| Vascular dementia with behavioral disturbance                               | F01.51      |  |                                                                                 |
| Dementia in other diseases classified elsewhere                             | F02         |  |                                                                                 |
| Dementia in Alzheimer's disease with early onset                            | F00.0       |  |                                                                                 |
| Alzheimer's disease with early onset                                        | G30.0       |  |                                                                                 |
| Dementia in Creutzfeldt-Jakob disease                                       | F02.1       |  |                                                                                 |
| Vascular dementia, unspecified                                              | F01.9       |  |                                                                                 |
| Dementia in other diseases classified elsewhere.                            | F02.8       |  |                                                                                 |
| Mixed cortical and subcortical vascular dementia                            | F01.3       |  |                                                                                 |

**eTable 4.** Validity of Dementia Diagnoses in Clinical Practice Research Datalink

|                           | Compared to HES (95% CI) | Compared to ONS (95% CI) |
|---------------------------|--------------------------|--------------------------|
| Specificity               | 0.79 (0.79 to 0.80)      | 0.75 (0.75 to 0.76),     |
| Sensitivity               | 0.59 (0.58 to 0.61)      | 0.65 (0.63 to 0.68)      |
| Positive predictive value | 0.37 (0.36 to 0.38)      | 0.15 (0.14 to 0.16)      |
| Negative predictive value | 0.90 (0.90 to 0.91)      | 0.97 (0.97 to 0.97)      |

Abbreviations: HES: Hospital Episode Statistics; ONS: Office for National Statistics

## eAppendix 2. Records of Psychiatric Illnesses

We identified records in CPRD and HES of the following categories of psychiatric illnesses: affective disorders, schizophrenia spectrum (and other psychosis), anxiety including obsessive compulsive disorders, personality disorders, eating disorders, sleep disorders, and substance misuse. An extra category was used for patients with more than one identified psychiatric illness. Codes used to identify psychiatric illnesses in CPRD GOLD were based on previously published lists<sup>1-3</sup>; we then updated those lists. For CPRD Aurum and HES, we created our own code lists.

The full lists of terms and codes for psychiatric illnesses used in our study are available in eTable 5 and eTable 6 below for Clinical Practice Research Datalink (CPRD) GOLD and CPRD Aurum, respectively. eTable 7 lists the International Statistical Classification of Diseases and Related Health Problems 10<sup>th</sup> version (ICD-10) codes used for identifying psychiatric illnesses in Hospital Episode Statistics (HES).

Although the accuracy and completeness of diagnostic coding in CPRD has been validated by two systematic reviews and proven to be of high quality<sup>4,5</sup>, the validation of codes for a wide range of psychiatric illness in CPRD has not been carried out yet. Nevertheless, codes for selective mental health conditions related to schizophrenia and psychosis were validated in VAMP (the former system employed by CPRD)<sup>6</sup>. The authors manually reviewed primary care computer records and reported a sensitivity of 88% (95% CI: 62% to 98%) and 91% (95% CI: 74% to 97%) for records of schizophrenia and non-organic psychosis, respectively. The positive predictive value for schizophrenia and non-organic psychosis were 71% (95% CI: 48% to 88%) and 91% (95% CI: 74% to 98%), respectively.

- 
1. Abel KM, Hope H, Swift E, et al. Prevalence of maternal mental illness among children and adolescents in the UK between 2005 and 2017: a national retrospective cohort analysis. *The Lancet Public Health*. 2019;4(6):e291-e300. doi:10.1016/S2468-2667(19)30059-3
  2. Springate DA, Kontopantelis E, Ashcroft DM, et al. ClinicalCodes: An Online Clinical Codes Repository to Improve the Validity and Reproducibility of Research Using Electronic Medical Records. Petersen I, ed. *PLoS ONE*. 2014;9(6):e99825. doi:10.1371/journal.pone.0099825
  3. Windfuhr K, While D, Kapur N, et al. Suicide risk linked with clinical consultation frequency, psychiatric diagnoses and psychotropic medication prescribing in a national study of primary-care patients. *Psychological Medicine*. 2016;46(16):3407-3417. doi:10.1017/S0033291716001823
  4. Khan NF, Harrison SE, Rose PW. Validity of diagnostic coding within the General Practice Research Database: a systematic review. *British Journal of General Practice*. 2010;60(572):e128-e136. doi:10.3399/bjgp10X483562
  5. Herrett E, Thomas SL, Schoonen WM, Smeeth L, Hall AJ. Validation and validity of diagnoses in the General Practice Research Database: a systematic review. *British Journal of Clinical Pharmacology*. 2010;69(1):4-14. doi:10.1111/j.1365-2125.2009.03537.x
  6. Nazareth I, King M, Haines A, Rangel L, Myers S. Accuracy of diagnosis of psychosis on general practice computer system. *BMJ*. 1993;307(6895):32-34. doi:10.1136/bmj.307.6895.32

**eTable 5. Read Terms and Codes Used for Identifying Psychiatric Illnesses in CPRD GOLD**

| Read Code | Term                                                          | Category            |         |                                                           |                     |
|-----------|---------------------------------------------------------------|---------------------|---------|-----------------------------------------------------------|---------------------|
|           |                                                               |                     | 1B17.11 | C/O - feeling depressed                                   | affective disorders |
| 1B16.00   | Agitated                                                      | affective disorders | 1B17.12 | C/O - feeling unhappy                                     | affective disorders |
| E112.11   | Agitated depression                                           | affective disorders | 1B11111 | C/O weepiness                                             | affective disorders |
| E135.00   | Agitated depression                                           | affective disorders | E2B1.00 | Chronic depression                                        | affective disorders |
| E004300   | Arteriosclerotic dementia with depression                     | affective disorders | 1B17.00 | Depressed                                                 | affective disorders |
| E11y200   | Atypical depressive disorder                                  | affective disorders | 1BT..00 | Depressed mood                                            | affective disorders |
| E11y100   | Atypical manic disorder                                       | affective disorders | 9H90.00 | Depression annual review                                  | affective disorders |
| E114300   | Bipolar affect disord, currently manic, severe, no psychosis  | affective disorders | 9H92.00 | Depression interim review                                 | affective disorders |
| E114400   | Bipolar affect disord, currently manic, severe with psychosis | affective disorders | 8BK0.00 | Depression management programme                           | affective disorders |
| E115500   | Bipolar affect disord, now depressed, part/unspec remission   | affective disorders | 9H91.00 | Depression medication review                              | affective disorders |
| E115400   | Bipolar affect disord, now depressed, severe with psychosis   | affective disorders | 212S.00 | Depression resolved                                       | affective disorders |
| E115300   | Bipolar affect disord, now depressed, severe, no psychosis    | affective disorders | E2B..00 | Depressive disorder NEC                                   | affective disorders |
| E114500   | Bipolar affect disord, currently manic, part/unspec remission | affective disorders | E11..12 | Depressive psychoses                                      | affective disorders |
| 212V.00   | Bipolar affective disorder resolved                           | affective disorders | 1B1U.11 | Depressive symptoms                                       | affective disorders |
| E115.00   | Bipolar affective disorder, currently depressed               | affective disorders | 1BY..00 | Elevated mood                                             | affective disorders |
| E115z00   | Bipolar affective disorder, currently depressed, NOS          | affective disorders | E112.14 | Endogenous depression                                     | affective disorders |
| E115100   | Bipolar affective disorder, currently depressed, mild         | affective disorders | E113.11 | Endogenous depression - recurrent                         | affective disorders |
| E115200   | Bipolar affective disorder, currently depressed, moderate     | affective disorders | E112.12 | Endogenous depression first episode                       | affective disorders |
| E115000   | Bipolar affective disorder, currently depressed, unspecified  | affective disorders | E112.13 | Endogenous depression first episode                       | affective disorders |
| E114.00   | Bipolar affective disorder, currently manic                   | affective disorders | 1465.00 | H/O: depression                                           | affective disorders |
| E114z00   | Bipolar affective disorder, currently manic, NOS              | affective disorders | 146D.00 | H/O: manic depressive disorder                            | affective disorders |
| E114600   | Bipolar affective disorder, currently manic, full remission   | affective disorders | E110.11 | Hypomanic psychoses                                       | affective disorders |
| E114100   | Bipolar affective disorder, currently manic, mild             | affective disorders | 6657.11 | Lithium monitoring                                        | affective disorders |
| E114200   | Bipolar affective disorder, currently manic, moderate         | affective disorders | 1BQ..00 | Loss of capacity for enjoyment                            | affective disorders |
| E114000   | Bipolar affective disorder, currently manic, unspecified      | affective disorders | 1BU..00 | Loss of hope for the future                               | affective disorders |
| E115600   | Bipolar affective disorder, now depressed, in full remission  | affective disorders | 1BT..11 | Low mood                                                  | affective disorders |
| E11..11   | Bipolar psychoses                                             | affective disorders | E110.00 | Manic disorder, single episode                            | affective disorders |
| E290.00   | Brief depressive reaction                                     | affective disorders | E110z00 | Manic disorder, single episode NOS                        | affective disorders |
| E290z00   | Brief depressive reaction NOS                                 | affective disorders | 1S42.00 | Manic mood                                                | affective disorders |
|           |                                                               |                     | E11..13 | Manic psychoses                                           | affective disorders |
|           |                                                               |                     | E115.11 | Manic-depressive - now depressed                          | affective disorders |
|           |                                                               |                     | E114.11 | Manic-depressive - now manic                              | affective disorders |
|           |                                                               |                     | E11z200 | Masked depression                                         | affective disorders |
|           |                                                               |                     | L184300 | Mental disorder during pregnancy - baby not yet delivered | affective disorders |

|         |                                                              |                     |         |                                                               |                     |
|---------|--------------------------------------------------------------|---------------------|---------|---------------------------------------------------------------|---------------------|
| L184400 | Mental disorder in puerperium - baby previously delivered    | affective disorders | E113z00 | Recurrent major depressive episode NOS                        | affective disorders |
| L184200 | Mental disorder in the puerperium - baby delivered           | affective disorders | E113600 | Recurrent major depressive episodes, in full remission        | affective disorders |
| L184.00 | Mental disorders in pregnancy, childbirth and the puerperium | affective disorders | E113100 | Recurrent major depressive episodes, mild                     | affective disorders |
| E116.00 | Mixed bipolar affective disorder                             | affective disorders | E113200 | Recurrent major depressive episodes, moderate                 | affective disorders |
| E116z00 | Mixed bipolar affective disorder, NOS                        | affective disorders | E113300 | Recurrent major depressive episodes, severe, no psychosis     | affective disorders |
| E116600 | Mixed bipolar affective disorder, in full remission          | affective disorders | E113400 | Recurrent major depressive episodes, severe, with psychosis   | affective disorders |
| E116100 | Mixed bipolar affective disorder, mild                       | affective disorders | E113000 | Recurrent major depressive episodes, unspecified              | affective disorders |
| E116200 | Mixed bipolar affective disorder, moderate                   | affective disorders | E113500 | Recurrent major depressive episodes, partial/unspec remission | affective disorders |
| E116500 | Mixed bipolar affective disorder, partial/unspec remission   | affective disorders | E111z00 | Recurrent manic episode NOS                                   | affective disorders |
| E116400 | Mixed bipolar affective disorder, severe, with psychosis     | affective disorders | E111.00 | Recurrent manic episodes                                      | affective disorders |
| E116300 | Mixed bipolar affective disorder, severe, without psychosis  | affective disorders | E111600 | Recurrent manic episodes, in full remission                   | affective disorders |
| E116000 | Mixed bipolar affective disorder, unspecified                | affective disorders | E111100 | Recurrent manic episodes, mild                                | affective disorders |
| 1BO.00  | Mood swings                                                  | affective disorders | E111200 | Recurrent manic episodes, moderate                            | affective disorders |
| E204.00 | Neurotic depression reactive type                            | affective disorders | E111500 | Recurrent manic episodes, partial or unspecified remission    | affective disorders |
| 2257.00 | O/E - depressed                                              | affective disorders | E111300 | Recurrent manic episodes, severe without mention psychosis    | affective disorders |
| 225C.00 | O/E - elated                                                 | affective disorders | E111400 | Recurrent manic episodes, severe, with psychosis              | affective disorders |
| 9HA0.00 | On depression register                                       | affective disorders | E111000 | Recurrent manic episodes, unspecified                         | affective disorders |
| 9kQ.00  | On full dose long term treatment depression - enh serv admin | affective disorders | 8HHq.00 | Referral for guided self-help for depression                  | affective disorders |
| 6657.00 | On lithium                                                   | affective disorders | 9HA1.00 | Removed from depression register                              | affective disorders |
| E11y.00 | Other and unspecified manic-depressive psychoses             | affective disorders | E118.00 | Seasonal affective disorder                                   | affective disorders |
| E11yz00 | Other and unspecified manic-depressive psychoses NOS         | affective disorders | E002100 | Senile dementia with depression                               | affective disorders |
| E11y300 | Other mixed manic-depressive psychoses                       | affective disorders | E112.00 | Single major depressive episode                               | affective disorders |
| E204.11 | Postnatal depression                                         | affective disorders | E112z00 | Single major depressive episode NOS                           | affective disorders |
| E2B0.00 | Postviral depression                                         | affective disorders | E112600 | Single major depressive episode, in full remission            | affective disorders |
| E001300 | Presenile dementia with depression                           | affective disorders | E112100 | Single major depressive episode, mild                         | affective disorders |
| E291.00 | Prolonged depressive reaction                                | affective disorders | E112200 | Single major depressive episode, moderate                     | affective disorders |
| 212T.00 | Psychosis, schizophrenia + bipolar affective disord resolved | affective disorders | E112500 | Single major depressive episode, partial or unspec remission  | affective disorders |
| 62T1.00 | Puerperal depression                                         | affective disorders | E112400 | Single major depressive episode, severe, with psychosis       | affective disorders |
| E130.00 | Reactive depressive psychosis                                | affective disorders | E112300 | Single major depressive episode, severe, without psychosis    | affective disorders |
| E11z100 | Rebound mood swings                                          | affective disorders | E112000 | Single major depressive episode, unspecified                  | affective disorders |
| E113700 | Recurrent depression                                         | affective disorders | E110600 | Single manic episode in full remission                        | affective disorders |
| E113.00 | Recurrent major depressive episode                           | affective disorders | E110500 | Single manic episode in partial or unspecified remission      | affective disorders |

|         |                                                               |                     |         |                                                               |                     |
|---------|---------------------------------------------------------------|---------------------|---------|---------------------------------------------------------------|---------------------|
| E110100 | Single manic episode, mild                                    | affective disorders | Eu31.00 | [X]Bipolar affective disorder                                 | affective disorders |
| E110200 | Single manic episode, moderate                                | affective disorders | Eu31800 | [X]Bipolar affective disorder type I                          | affective disorders |
| E110300 | Single manic episode, severe without mention of psychosis     | affective disorders | Eu31900 | [X]Bipolar affective disorder type II                         | affective disorders |
| E110400 | Single manic episode, severe, with psychosis                  | affective disorders | Eu31000 | [X]Bipolar affective disorder, current episode hypomanic      | affective disorders |
| E110000 | Single manic episode, unspecified                             | affective disorders | Eu31600 | [X]Bipolar affective disorder, current episode mixed          | affective disorders |
| 6657.12 | Started lithium                                               | affective disorders | Eu31700 | [X]Bipolar affective disorder, currently in remission         | affective disorders |
| 1JJ..00 | Suspected depression                                          | affective disorders | Eu31z00 | [X]Bipolar affective disorder, unspecified                    | affective disorders |
| 1B1U.00 | Symptoms of depression                                        | affective disorders | Eu30.11 | [X]Bipolar disorder, single manic episode                     | affective disorders |
| E117500 | Unspecified bipolar affect disord, partial/unspec remission   | affective disorders | Eu34000 | [X]Cyclothymia                                                | affective disorders |
| E117.00 | Unspecified bipolar affective disorder                        | affective disorders | Eu32z11 | [X]Depression NOS                                             | affective disorders |
| E117z00 | Unspecified bipolar affective disorder, NOS                   | affective disorders | Eu92000 | [X]Depressive conduct disorder                                | affective disorders |
| E117600 | Unspecified bipolar affective disorder, in full remission     | affective disorders | Eu32z12 | [X]Depressive disorder NOS                                    | affective disorders |
| E117100 | Unspecified bipolar affective disorder, mild                  | affective disorders | Eu32.00 | [X]Depressive episode                                         | affective disorders |
| E117200 | Unspecified bipolar affective disorder, moderate              | affective disorders | Eu32z00 | [X]Depressive episode, unspecified                            | affective disorders |
| E117300 | Unspecified bipolar affective disorder, severe, no psychosis  | affective disorders | Eu34111 | [X]Depressive neurosis                                        | affective disorders |
| E117000 | Unspecified bipolar affective disorder, unspecified           | affective disorders | Eu34100 | [X]Dysthymia                                                  | affective disorders |
| E117400 | Unspecified bipolar affective disorder, severe with psychosis | affective disorders | Eu33311 | [X]Endogenous depression with psychotic symptoms              | affective disorders |
| E11y000 | Unspecified manic-depressive psychoses                        | affective disorders | Eu33211 | [X]Endogenous depression without psychotic symptoms           | affective disorders |
| E03y300 | Unspecified puerperal psychosis                               | affective disorders | Eu30000 | [X]Hypomania                                                  | affective disorders |
| ZV11111 | [V]Personal history of manic-depressive psychosis             | affective disorders | Eu32500 | [X]Major depression, mild                                     | affective disorders |
| ZV11112 | [V]Personal history of manic-depressive psychosis             | affective disorders | Eu32600 | [X]Major depression, moderately severe                        | affective disorders |
| Eu32z14 | [X] Reactive depression NOS                                   | affective disorders | Eu33212 | [X]Major depression, recurrent without psychotic symptoms     | affective disorders |
| Eu3z.11 | [X]Affective psychosis NOS                                    | affective disorders | Eu32800 | [X]Major depression, severe with psychotic symptoms           | affective disorders |
| Eu32B00 | [X]Antenatal depression                                       | affective disorders | Eu32700 | [X]Major depression, severe without psychotic symptoms        | affective disorders |
| Eu32y11 | [X]Atypical depression                                        | affective disorders | Eu30z11 | [X]Mania NOS                                                  | affective disorders |
| Eu31400 | [X]Bipol aff disord, curr epis sev depress, no psychot symp   | affective disorders | Eu30211 | [X]Mania with mood-congruent psychotic symptoms               | affective disorders |
| Eu31y11 | [X]Bipolar II disorder                                        | affective disorders | Eu30212 | [X]Mania with mood-incongruent psychotic symptoms             | affective disorders |
| Eu31911 | [X]Bipolar II disorder                                        | affective disorders | Eu30200 | [X]Mania with psychotic symptoms                              | affective disorders |
| Eu31500 | [X]Bipolar affect dis cur epi severe depres with psych symp   | affective disorders | Eu30100 | [X]Mania without psychotic symptoms                           | affective disorders |
| Eu31200 | [X]Bipolar affect disorder cur epi manic with psychotic symp  | affective disorders | Eu30.00 | [X]Manic episode                                              | affective disorders |
| Eu31100 | [X]Bipolar affect disorder cur epi manic wout psychotic symp  | affective disorders | Eu30z00 | [X]Manic episode, unspecified                                 | affective disorders |
| Eu31300 | [X]Bipolar affect disorder cur epi mild or moderate depressn  | affective disorders | Eu33213 | [X]Manic-depress psychosis, depressd, no psychotic symptoms   | affective disorders |
|         |                                                               |                     | Eu33312 | [X]Manic-depress psychosis, depressed type+psychotic symptoms | affective disorders |
|         |                                                               |                     | Eu31.11 | [X]Manic-depressive illness                                   | affective disorders |

|         |                                                               |                     |         |                                                              |                     |
|---------|---------------------------------------------------------------|---------------------|---------|--------------------------------------------------------------|---------------------|
| Eu31.12 | [X]Manic-depressive psychosis                                 | affective disorders | Eu33300 | [X]Recurrent depress disorder cur epi severe with psych symp | affective disorders |
| Eu31.13 | [X]Manic-depressive reaction                                  | affective disorders | Eu33.00 | [X]Recurrent depressive disorder                             | affective disorders |
| Eu53.00 | [X]Mental and behav disorders assoc with the puerperium NEC   | affective disorders | Eu33000 | [X]Recurrent depressive disorder, current episode mild       | affective disorders |
| Eu15500 | [X]Mental/behav dis oth stims inc caffeine: psychotic dis     | affective disorders | Eu33100 | [X]Recurrent depressive disorder, current episode moderate   | affective disorders |
| Eu32400 | [X]Mild depression                                            | affective disorders | Eu33400 | [X]Recurrent depressive disorder, currently in remission     | affective disorders |
| Eu32000 | [X]Mild depressive episode                                    | affective disorders | Eu33z00 | [X]Recurrent depressive disorder, unspecified                | affective disorders |
| Eu53000 | [X]Mild mental/behav disorder assoc with the puerperium NEC   | affective disorders | Eu33.11 | [X]Recurrent episodes of depressive reaction                 | affective disorders |
| Eu3y011 | [X]Mixed affective episode                                    | affective disorders | Eu33.12 | [X]Recurrent episodes of psychogenic depression              | affective disorders |
| Eu32100 | [X]Moderate depressive episode                                | affective disorders | Eu33.13 | [X]Recurrent episodes of reactive depression                 | affective disorders |
| Eu33z11 | [X]Monopolar depression NOS                                   | affective disorders | Eu31y12 | [X]Recurrent manic episodes                                  | affective disorders |
| Eu3.00  | [X]Mood - affective disorders                                 | affective disorders | Eu33315 | [X]Recurrent severe episodes of psychotic depression         | affective disorders |
| Eu34113 | [X]Neurotic depression                                        | affective disorders | Eu33316 | [X]Recurrent severe episodes/reactive depressive psychosis   | affective disorders |
| Eu31y00 | [X]Other bipolar affective disorders                          | affective disorders | Eu33.15 | [X]SAD - Seasonal affective disorder                         | affective disorders |
| Eu32y00 | [X]Other depressive episodes                                  | affective disorders | Eu33.14 | [X]Seasonal depressive disorder                              | affective disorders |
| Eu30y00 | [X]Other manic episodes                                       | affective disorders | Eu32300 | [X]Severe depressive episode with psychotic symptoms         | affective disorders |
| Eu3y.00 | [X]Other mood affective disorders                             | affective disorders | Eu32200 | [X]Severe depressive episode without psychotic symptoms      | affective disorders |
| Eu34y00 | [X]Other persistent mood affective disorders                  | affective disorders | Eu53100 | [X]Severe mental and behav disorder assoc wth puerperium NEC | affective disorders |
| Eu33y00 | [X]Other recurrent depressive disorders                       | affective disorders | Eu32211 | [X]Single episode agitated depressn w/out psychotic symptoms | affective disorders |
| Eu3y100 | [X]Other recurrent mood affective disorders                   | affective disorders | Eu32212 | [X]Single episode major depression w/out psychotic symptoms  | affective disorders |
| Eu3y000 | [X]Other single mood affective disorders                      | affective disorders | Eu32.11 | [X]Single episode of depressive reaction                     | affective disorders |
| Eu3yy00 | [X]Other specified mood affective disorders                   | affective disorders | Eu32311 | [X]Single episode of major depression and psychotic symptoms | affective disorders |
| Eu34z00 | [X]Persistent mood affective disorder, unspecified            | affective disorders | Eu32y12 | [X]Single episode of masked depression NOS                   | affective disorders |
| Eu34.00 | [X]Persistent mood affective disorders                        | affective disorders | Eu32.12 | [X]Single episode of psychogenic depression                  | affective disorders |
| Eu53011 | [X]Postnatal depression NOS                                   | affective disorders | Eu32312 | [X]Single episode of psychogenic depressive psychosis        | affective disorders |
| Eu53012 | [X]Postpartum depression NOS                                  | affective disorders | Eu32313 | [X]Single episode of psychotic depression                    | affective disorders |
| Eu32z13 | [X]Prolonged single episode of reactive depression            | affective disorders | Eu32.13 | [X]Single episode of reactive depression                     | affective disorders |
| Eu53z00 | [X]Puerperal mental disorder, unspecified                     | affective disorders | Eu32314 | [X]Single episode of reactive depressive psychosis           | affective disorders |
| Eu33200 | [X]Recurr depress disorder cur epi severe without psych sympt | affective disorders | Eu32213 | [X]Single episode vital depression w/out psychotic symptoms  | affective disorders |
| Eu32A00 | [X]Recurr major depr ep, severe with psych, psych in remiss   | affective disorders | Eu32900 | [X]Single major depr ep, severe with psych, psych in remiss  | affective disorders |
| Eu33313 | [X]Recurr severe episodes/major depression+psychotic symptom  | affective disorders |         |                                                              |                     |
| Eu33314 | [X]Recurr severe episodes/psychogenic depressive psychosis    | affective disorders |         |                                                              |                     |
| Eu3y111 | [X]Recurrent brief depressive episodes                        | affective disorders |         |                                                              |                     |

|         |                                                             |                      |         |                                               |                      |
|---------|-------------------------------------------------------------|----------------------|---------|-----------------------------------------------|----------------------|
| Eu3z.00 | [X]Unspecified mood affective disorder                      | affective disorders  | E200z00 | Anxiety state NOS                             | anxiety&neur<br>osis |
| Eu33214 | [X]Vital depression, recurrent without psychotic symptoms   | affective disorders  | E200000 | Anxiety state unspecified                     | anxiety&neur<br>osis |
| Z4I7.00 | Acknowledging anxiety                                       | anxiety&neur<br>osis | E200.00 | Anxiety states                                | anxiety&neur<br>osis |
| E202600 | Acrophobia                                                  | anxiety&neur<br>osis | E200300 | Anxiety with depression                       | anxiety&neur<br>osis |
| E281.00 | Acute fugue state due to acute stress reaction              | anxiety&neur<br>osis | E201z11 | Aphonia - hysterical                          | anxiety&neur<br>osis |
| E280.00 | Acute panic state due to acute stress reaction              | anxiety&neur<br>osis | E201611 | Astasia - abasia, hysterical                  | anxiety&neur<br>osis |
| E283100 | Acute posttrauma stress state                               | anxiety&neur<br>osis | E201z12 | Ataxia - hysterical                           | anxiety&neur<br>osis |
| E28..00 | Acute reaction to stress                                    | anxiety&neur<br>osis | E290011 | Bereavement reaction                          | anxiety&neur<br>osis |
| E283000 | Acute situational disturbance                               | anxiety&neur<br>osis | E20y011 | Briquet's disorder                            | anxiety&neur<br>osis |
| E28z.00 | Acute stress reaction NOS                                   | anxiety&neur<br>osis | E26y000 | Bruxism (teeth grinding)                      | anxiety&neur<br>osis |
| E282.00 | Acute stupor state due to acute stress reaction             | anxiety&neur<br>osis | E202B00 | Cancer phobia                                 | anxiety&neur<br>osis |
| E29..00 | Adjustment reaction                                         | anxiety&neur<br>osis | E262000 | Cardiac neurosis                              | anxiety&neur<br>osis |
| E29z.00 | Adjustment reaction NOS                                     | anxiety&neur<br>osis | E200400 | Chronic anxiety                               | anxiety&neur<br>osis |
| E29y400 | Adjustment reaction due to hospitalisation                  | anxiety&neur<br>osis | E202800 | Claustrophobia                                | anxiety&neur<br>osis |
| E293000 | Adjustment reaction with aggression                         | anxiety&neur<br>osis | E28..11 | Combat fatigue                                | anxiety&neur<br>osis |
| E293100 | Adjustment reaction with antisocial behaviour               | anxiety&neur<br>osis | E201B00 | Compensation neurosis                         | anxiety&neur<br>osis |
| E292400 | Adjustment reaction with anxious mood                       | anxiety&neur<br>osis | E203000 | Compulsive neurosis                           | anxiety&neur<br>osis |
| E293200 | Adjustment reaction with destructiveness                    | anxiety&neur<br>osis | E29y000 | Concentration camp syndrome                   | anxiety&neur<br>osis |
| E294.00 | Adjustment reaction with disturbance emotion and conduct    | anxiety&neur<br>osis | E292500 | Culture shock                                 | anxiety&neur<br>osis |
| E292z00 | Adjustment reaction with disturbance of other emotion NOS   | anxiety&neur<br>osis | E202C00 | Dental phobia                                 | anxiety&neur<br>osis |
| E292y00 | Adjustment reaction with mixed disturbance of emotion       | anxiety&neur<br>osis | E206.00 | Depersonalisation syndrome                    | anxiety&neur<br>osis |
| E29y200 | Adjustment reaction with physical symptoms                  | anxiety&neur<br>osis | Z522400 | Desensitisation - phobia                      | anxiety&neur<br>osis |
| E293.00 | Adjustment reaction with predominant disturbance of conduct | anxiety&neur<br>osis | E201A00 | Dissociative reaction unspecified             | anxiety&neur<br>osis |
| E292.00 | Adjustment reaction, predominant disturbance other emotions | anxiety&neur<br>osis | E292200 | Early adult emancipation disorder             | anxiety&neur<br>osis |
| E292100 | Adolescent emancipation disorder                            | anxiety&neur<br>osis | E29y300 | Elective mutism due to an adjustment reaction | anxiety&neur<br>osis |
| E202100 | Agoraphobia with panic attacks                              | anxiety&neur<br>osis | E28z.11 | Examination fear                              | anxiety&neur<br>osis |
| E202200 | Agoraphobia without mention of panic attacks                | anxiety&neur<br>osis | E202900 | Fear of crowds                                | anxiety&neur<br>osis |
| E264011 | Air swallowing - excessive                                  | anxiety&neur<br>osis | E202D00 | Fear of death                                 | anxiety&neur<br>osis |
| E203.11 | Anancastic neurosis                                         | anxiety&neur<br>osis | E202A00 | Fear of flying                                | anxiety&neur<br>osis |
| E202700 | Animal phobia                                               | anxiety&neur<br>osis | E202E00 | Fear of pregnancy                             | anxiety&neur<br>osis |
| 8G52.00 | Antiphobic therapy                                          | anxiety&neur<br>osis | E201511 | Fit - hysterical                              | anxiety&neur<br>osis |
| Z4L1.00 | Anxiety counselling                                         | anxiety&neur<br>osis | Z522600 | Flooding - obsessional compulsive disorder    | anxiety&neur<br>osis |
| 8G94.00 | Anxiety management training                                 | anxiety&neur<br>osis | E28z.12 | Flying phobia                                 | anxiety&neur<br>osis |
|         |                                                             |                      | E201z13 | Ganser's syndrome - hysterical                | anxiety&neur<br>osis |
|         |                                                             |                      | E200200 | Generalised anxiety disorder                  | anxiety&neur<br>osis |
|         |                                                             |                      | E264.11 | Globus abdominalis                            | anxiety&neur<br>osis |



|         |                                              |                      |         |                                                          |                      |
|---------|----------------------------------------------|----------------------|---------|----------------------------------------------------------|----------------------|
| E201612 | Globus hystericus                            | anxiety&neur<br>osis | E29y100 | Other post-traumatic stress<br>disorder                  | anxiety&neur<br>osis |
| E290000 | Grief reaction                               | anxiety&neur<br>osis | E26y.00 | Other psychogenic<br>malfunction                         | anxiety&neur<br>osis |
| 146G.00 | H/O: agoraphobia                             | anxiety&neur<br>osis | E26yz00 | Other psychogenic<br>malfunction NOS                     | anxiety&neur<br>osis |
| E207.00 | Hypochondriasis                              | anxiety&neur<br>osis | E2y..00 | Other specified neuroses or<br>other mental disorders    | anxiety&neur<br>osis |
| E201.00 | Hysteria                                     | anxiety&neur<br>osis | E200111 | Panic attack                                             | anxiety&neur<br>osis |
| E201z00 | Hysteria NOS                                 | anxiety&neur<br>osis | E200100 | Panic disorder                                           | anxiety&neur<br>osis |
| E201000 | Hysteria unspecified                         | anxiety&neur<br>osis | 8CAZ000 | Patient given advice about<br>management of anxiety      | anxiety&neur<br>osis |
| E201700 | Hysterical amnesia                           | anxiety&neur<br>osis | E201C00 | Phantom pregnancy                                        | anxiety&neur<br>osis |
| E201100 | Hysterical blindness                         | anxiety&neur<br>osis | Z481.00 | Phobia counselling                                       | anxiety&neur<br>osis |
| E201200 | Hysterical deafness                          | anxiety&neur<br>osis | E202000 | Phobia unspecified                                       | anxiety&neur<br>osis |
| E201800 | Hysterical fugue                             | anxiety&neur<br>osis | E202.12 | Phobic anxiety                                           | anxiety&neur<br>osis |
| E201400 | Hysterical paralysis                         | anxiety&neur<br>osis | E202z00 | Phobic disorder NOS                                      | anxiety&neur<br>osis |
| E201500 | Hysterical seizures                          | anxiety&neur<br>osis | E202.00 | Phobic disorders                                         | anxiety&neur<br>osis |
| E201300 | Hysterical tremor                            | anxiety&neur<br>osis | F481700 | Photophobia                                              | anxiety&neur<br>osis |
| E278111 | Muscular headache                            | anxiety&neur<br>osis | E26..00 | Physiological malfunction<br>arising from mental factors | anxiety&neur<br>osis |
| E20z.11 | Nervous breakdown                            | anxiety&neur<br>osis | ZS7C700 | Post-traumatic mutism                                    | anxiety&neur<br>osis |
| E205.11 | Nervous exhaustion                           | anxiety&neur<br>osis | E278.00 | Psychalgia                                               | anxiety&neur<br>osis |
| E205.00 | Neurasthenia - nervous<br>debility           | anxiety&neur<br>osis | E278z00 | Psychalgia NOS                                           | anxiety&neur<br>osis |
| E262200 | Neurocirculatory asthenia                    | anxiety&neur<br>osis | E20y300 | Psychasthenic neurosis                                   | anxiety&neur<br>osis |
| E2z..00 | Neuroses or other mental<br>disorder NOS     | anxiety&neur<br>osis | E264000 | Psychogenic aerophagy                                    | anxiety&neur<br>osis |
| E20z.00 | Neurotic disorder NOS                        | anxiety&neur<br>osis | E261000 | Psychogenic air hunger                                   | anxiety&neur<br>osis |
| E20..00 | Neurotic disorders                           | anxiety&neur<br>osis | E261500 | Psychogenic aphonia                                      | anxiety&neur<br>osis |
| 225J.00 | O/E - panic attack                           | anxiety&neur<br>osis | E278200 | Psychogenic backache                                     | anxiety&neur<br>osis |
| E203100 | Obsessional neurosis                         | anxiety&neur<br>osis | E262300 | Psychogenic cardiovascular<br>disorder                   | anxiety&neur<br>osis |
| 1Ba0.00 | Obsessional thoughts                         | anxiety&neur<br>osis | E262z00 | Psychogenic cardiovascular<br>symptom NOS                | anxiety&neur<br>osis |
| E203z00 | Obsessive-compulsive<br>disorder NOS         | anxiety&neur<br>osis | E262.00 | Psychogenic cardiovascular<br>symptoms                   | anxiety&neur<br>osis |
| E203.00 | Obsessive-compulsive<br>disorders            | anxiety&neur<br>osis | E264500 | Psychogenic constipation                                 | anxiety&neur<br>osis |
| E283z00 | Other acute stress reaction<br>NOS           | anxiety&neur<br>osis | E261100 | Psychogenic cough                                        | anxiety&neur<br>osis |
| E283.00 | Other acute stress reactions                 | anxiety&neur<br>osis | E264300 | Psychogenic diarrhoea                                    | anxiety&neur<br>osis |
| E29y500 | Other adjustment reaction<br>with withdrawal | anxiety&neur<br>osis | E265200 | Psychogenic dysmenorrhea                                 | anxiety&neur<br>osis |
| E29y.00 | Other adjustment reactions                   | anxiety&neur<br>osis | E264400 | Psychogenic dyspepsia                                    | anxiety&neur<br>osis |
| E29yz00 | Other adjustment reactions<br>NOS            | anxiety&neur<br>osis | E265300 | Psychogenic dysuria                                      | anxiety&neur<br>osis |
| E201600 | Other conversion disorder                    | anxiety&neur<br>osis | E264z00 | Psychogenic gastrointestinal<br>tract symptom NOS        | anxiety&neur<br>osis |
| E20yz00 | Other neurotic disorder NOS                  | anxiety&neur<br>osis | E264.00 | Psychogenic gastrointestinal<br>tract symptoms           | anxiety&neur<br>osis |
| E20y.00 | Other neurotic disorders                     | anxiety&neur<br>osis | E265z00 | Psychogenic genitourinary<br>tract symptom NOS           | anxiety&neur<br>osis |
| E20y200 | Other occupational neurosis                  | anxiety&neur<br>osis | E265.00 | Psychogenic genitourinary<br>tract symptoms              | anxiety&neur<br>osis |

|         |                                                              |                      |         |                                                              |                      |
|---------|--------------------------------------------------------------|----------------------|---------|--------------------------------------------------------------|----------------------|
| E261200 | Psychogenic hiccough                                         | anxiety&neur<br>osis | E20y100 | Writer's cramp neurosis                                      | anxiety&neur<br>osis |
| E261300 | Psychogenic hyperventilation                                 | anxiety&neur<br>osis | Eu40211 | [X]Acrophobia                                                | anxiety&neur<br>osis |
| E260.00 | Psychogenic musculoskeletal symptoms                         | anxiety&neur<br>osis | Eu43011 | [X]Acute crisis reaction                                     | anxiety&neur<br>osis |
| E260z00 | Psychogenic musculoskeletal symptoms NOS                     | anxiety&neur<br>osis | Eu43300 | [X]Acute post-traumatic stress disorder follow military comb | anxiety&neur<br>osis |
| E278000 | Psychogenic pain unspecified                                 | anxiety&neur<br>osis | Eu43012 | [X]Acute reaction to stress                                  | anxiety&neur<br>osis |
| E260000 | Psychogenic paralysis                                        | anxiety&neur<br>osis | Eu43000 | [X]Acute stress reaction                                     | anxiety&neur<br>osis |
| E263000 | Psychogenic pruritus                                         | anxiety&neur<br>osis | Eu43200 | [X]Adjustment disorders                                      | anxiety&neur<br>osis |
| E261z00 | Psychogenic respiratory symptom NOS                          | anxiety&neur<br>osis | Eu40000 | [X]Agoraphobia                                               | anxiety&neur<br>osis |
| E261.00 | Psychogenic respiratory symptoms                             | anxiety&neur<br>osis | Eu40011 | [X]Agoraphobia without history of panic disorder             | anxiety&neur<br>osis |
| E263.00 | Psychogenic skin symptoms                                    | anxiety&neur<br>osis | Eu42.11 | [X]Anankastic neurosis                                       | anxiety&neur<br>osis |
| E263z00 | Psychogenic skin symptoms NOS                                | anxiety&neur<br>osis | Eu40212 | [X]Animal phobias                                            | anxiety&neur<br>osis |
| E267.00 | Psychogenic symptom of special sense organ                   | anxiety&neur<br>osis | Eu41z11 | [X]Anxiety NOS                                               | anxiety&neur<br>osis |
| E260100 | Psychogenic torticollis                                      | anxiety&neur<br>osis | Eu41z00 | [X]Anxiety disorder, unspecified                             | anxiety&neur<br>osis |
| E265100 | Psychogenic vaginismus                                       | anxiety&neur<br>osis | Eu41y11 | [X]Anxiety hysteria                                          | anxiety&neur<br>osis |
| E261400 | Psychogenic yawning                                          | anxiety&neur<br>osis | Eu41111 | [X]Anxiety neurosis                                          | anxiety&neur<br>osis |
| E26z.00 | Psychosomatic disorder NOS                                   | anxiety&neur<br>osis | Eu41112 | [X]Anxiety reaction                                          | anxiety&neur<br>osis |
| Z4I7100 | Recognising anxiety                                          | anxiety&neur<br>osis | Eu41113 | [X]Anxiety state                                             | anxiety&neur<br>osis |
| E200500 | Recurrent anxiety                                            | anxiety&neur<br>osis | Eu45211 | [X]Body dysmorphic disorder                                  | anxiety&neur<br>osis |
| 8HHp.00 | Referral for guided self-help for anxiety                    | anxiety&neur<br>osis | Eu46y11 | [X]Briquet's disorder                                        | anxiety&neur<br>osis |
| 8IH5300 | Referral for guided self-help for anxiety declined           | anxiety&neur<br>osis | Eu45012 | [X]Briquet's syndrome                                        | anxiety&neur<br>osis |
| E292000 | Separation anxiety disorder                                  | anxiety&neur<br>osis | Eu45311 | [X]Cardiac neurosis                                          | anxiety&neur<br>osis |
| E202300 | Social phobia, fear of eating in public                      | anxiety&neur<br>osis | Eu93y12 | [X]Childhood overanxious disorder                            | anxiety&neur<br>osis |
| E202400 | Social phobia, fear of public speaking                       | anxiety&neur<br>osis | Eu43400 | [X]Chron post-traumatic stress disorder follow military comb | anxiety&neur<br>osis |
| E202500 | Social phobia, fear of public washing                        | anxiety&neur<br>osis | Eu40213 | [X]Claustrophobia                                            | anxiety&neur<br>osis |
| E202.11 | Social phobic disorders                                      | anxiety&neur<br>osis | Eu43013 | [X]Combat fatigue                                            | anxiety&neur<br>osis |
| E20y000 | Somatization disorder                                        | anxiety&neur<br>osis | Eu44.11 | [X]Conversion hysteria                                       | anxiety&neur<br>osis |
| E292311 | Specific academic or work inhibition                         | anxiety&neur<br>osis | Eu44.12 | [X]Conversion reaction                                       | anxiety&neur<br>osis |
| E292300 | Specific academic or work inhibition                         | anxiety&neur<br>osis | Eu43014 | [X]Crisis state                                              | anxiety&neur<br>osis |
| E292312 | Specific work inhibition                                     | anxiety&neur<br>osis | Eu43211 | [X]Culture shock                                             | anxiety&neur<br>osis |
| E264311 | Spurious diarrhoea                                           | anxiety&neur<br>osis | Eu45312 | [X]Da Costa's syndrome                                       | anxiety&neur<br>osis |
| E28z.13 | Stage fright                                                 | anxiety&neur<br>osis | Eu43500 | [X]Delayed post-traumat stress disorder follow military comb | anxiety&neur<br>osis |
| E284.00 | Stress reaction causing mixed disturbance of emotion/conduct | anxiety&neur<br>osis | Eu46100 | [X]Depersonalization - derealization syndrome                | anxiety&neur<br>osis |
| E278100 | Tension headache                                             | anxiety&neur<br>osis | Eu46y12 | [X]Dhat syndrome                                             | anxiety&neur<br>osis |
| E205.12 | Tired all the time                                           | anxiety&neur<br>osis | Eu44z00 | [X]Dissociative [conversion] disorder, unspecified           | anxiety&neur<br>osis |
| E202z11 | Weight fixation                                              | anxiety&neur<br>osis | Eu44.00 | [X]Dissociative [conversion] disorders                       | anxiety&neur<br>osis |

|         |                                                         |                      |         |                                                              |                      |
|---------|---------------------------------------------------------|----------------------|---------|--------------------------------------------------------------|----------------------|
| Eu44000 | [X]Dissociative amnesia                                 | anxiety&neur<br>osis | Eu46y13 | [X]Occupational neurosis,<br>including writer's cramp        | anxiety&neur<br>osis |
| Eu44600 | [X]Dissociative anaesthesia<br>and sensory loss         | anxiety&neur<br>osis | Eu05400 | [X]Organic anxiety disorder                                  | anxiety&neur<br>osis |
| Eu44500 | [X]Dissociative convulsions                             | anxiety&neur<br>osis | Eu41.00 | [X]Other anxiety disorders                                   | anxiety&neur<br>osis |
| Eu44100 | [X]Dissociative fugue                                   | anxiety&neur<br>osis | Eu44y00 | [X]Other dissociative<br>[conversion] disorders              | anxiety&neur<br>osis |
| Eu44400 | [X]Dissociative motor<br>disorders                      | anxiety&neur<br>osis | Eu41300 | [X]Other mixed anxiety<br>disorders                          | anxiety&neur<br>osis |
| Eu44200 | [X]Dissociative stupor                                  | anxiety&neur<br>osis | Eu46.00 | [X]Other neurotic disorders                                  | anxiety&neur<br>osis |
| Eu51511 | [X]Dream anxiety disorder                               | anxiety&neur<br>osis | Eu42y00 | [X]Other obsessive-<br>compulsive disorders                  | anxiety&neur<br>osis |
| Eu45212 | [X]Dysmorphophobia<br>nondelusional                     | anxiety&neur<br>osis | Eu40y00 | [X]Other phobic anxiety<br>disorders                         | anxiety&neur<br>osis |
| Eu46011 | [X]Fatigue syndrome                                     | anxiety&neur<br>osis | Eu43y00 | [X]Other reactions to severe<br>stress                       | anxiety&neur<br>osis |
| Eu44y11 | [X]Ganser's syndrome                                    | anxiety&neur<br>osis | Eu45y00 | [X]Other somatoform<br>disorders                             | anxiety&neur<br>osis |
| Eu45313 | [X]Gastric neurosis                                     | anxiety&neur<br>osis | Eu41y00 | [X]Other specified anxiety<br>disorders                      | anxiety&neur<br>osis |
| Eu41100 | [X]Generalized anxiety<br>disorder                      | anxiety&neur<br>osis | Eu46y00 | [X]Other specified neurotic<br>disorders                     | anxiety&neur<br>osis |
| Eu45511 | [X]Globus hystericus                                    | anxiety&neur<br>osis | Eu41011 | [X]Panic attack                                              | anxiety&neur<br>osis |
| Eu45y12 | [X]Globus hystericus                                    | anxiety&neur<br>osis | Eu41000 | [X]Panic disorder [episodic<br>paroxysmal anxiety]           | anxiety&neur<br>osis |
| Eu45500 | [X]Globus pharyngeus                                    | anxiety&neur<br>osis | Eu40012 | [X]Panic disorder with<br>agoraphobia                        | anxiety&neur<br>osis |
| Eu43212 | [X]Grief reaction                                       | anxiety&neur<br>osis | Eu41012 | [X]Panic state                                               | anxiety&neur<br>osis |
| Eu43213 | [X]Hospitalism in children                              | anxiety&neur<br>osis | Eu34114 | [X]Persistant anxiety<br>depression                          | anxiety&neur<br>osis |
| Eu45200 | [X]Hypochondriacal disorder                             | anxiety&neur<br>osis | Eu45400 | [X]Persistent somatoform<br>pain disorder                    | anxiety&neur<br>osis |
| Eu45213 | [X]Hypochondriacal neurosis                             | anxiety&neur<br>osis | Eu40z11 | [X]Phobia NOS                                                | anxiety&neur<br>osis |
| Eu45214 | [X]Hypochondriasis                                      | anxiety&neur<br>osis | Eu93100 | [X]Phobic anxiety disorder of<br>childhood                   | anxiety&neur<br>osis |
| Eu44.13 | [X]Hysteria                                             | anxiety&neur<br>osis | Eu40z00 | [X]Phobic anxiety disorder,<br>unspecified                   | anxiety&neur<br>osis |
| Eu41211 | [X]Mild anxiety depression                              | anxiety&neur<br>osis | Eu40.00 | [X]Phobic anxiety disorders                                  | anxiety&neur<br>osis |
| Eu41200 | [X]Mixed anxiety and<br>depressive disorder             | anxiety&neur<br>osis | Eu40z12 | [X]Phobic state NOS                                          | anxiety&neur<br>osis |
| Eu44700 | [X]Mixed dissociative<br>[conversion] disorders         | anxiety&neur<br>osis | Eu43100 | [X]Post - traumatic stress<br>disorder                       | anxiety&neur<br>osis |
| Eu42200 | [X]Mixed obsessional<br>thoughts and acts               | anxiety&neur<br>osis | Eu42100 | [X]Predominantly<br>compulsive acts<br>[obsessional rituals] | anxiety&neur<br>osis |
| Eu45011 | [X]Multiple psychosomatic<br>disorder                   | anxiety&neur<br>osis | Eu42000 | [X]Predominantly<br>obsessional thoughts or<br>ruminations   | anxiety&neur<br>osis |
| Eu40300 | [X]Needle phobia                                        | anxiety&neur<br>osis | Eu44511 | [X]Pseudoseizures                                            | anxiety&neur<br>osis |
| Eu46000 | [X]Neurasthenia                                         | anxiety&neur<br>osis | Eu45411 | [X]Psychalgia                                                | anxiety&neur<br>osis |
| Eu45314 | [X]Neurocirculatory asthenia                            | anxiety&neur<br>osis | Eu46y14 | [X]Psychasthenia                                             | anxiety&neur<br>osis |
| Eu46z11 | [X]Neurosis NOS                                         | anxiety&neur<br>osis | Eu46y15 | [X]Psychasthenia neurosis                                    | anxiety&neur<br>osis |
| Eu46z00 | [X]Neurotic disorder,<br>unspecified                    | anxiety&neur<br>osis | Eu43015 | [X]Psychic shock                                             | anxiety&neur<br>osis |
| Eu4.00  | [X]Neurotic, stress - related<br>and somoform disorders | anxiety&neur<br>osis | Eu45324 | [X]Psychogenic IBS                                           | anxiety&neur<br>osis |
| Eu45215 | [X]Nosophobia                                           | anxiety&neur<br>osis | Eu44411 | [X]Psychogenic aphonia                                       | anxiety&neur<br>osis |
| Eu42.00 | [X]Obsessive - compulsive<br>disorder                   | anxiety&neur<br>osis | Eu45412 | [X]Psychogenic backache                                      | anxiety&neur<br>osis |
| Eu42z00 | [X]Obsessive-compulsive<br>disorder, unspecified        | anxiety&neur<br>osis | Eu44y13 | [X]Psychogenic confusion                                     | anxiety&neur<br>osis |
| Eu42.12 | [X]Obsessive-compulsive<br>neurosis                     | anxiety&neur<br>osis |         |                                                              |                      |

|         |                                                           |                      |         |                                                        |                     |
|---------|-----------------------------------------------------------|----------------------|---------|--------------------------------------------------------|---------------------|
| Eu45316 | [X]Psychogenic cough                                      | anxiety&neur<br>osis | E271.00 | Anorexia nervosa                                       | eating<br>disorders |
| Eu44611 | [X]Psychogenic deafness                                   | anxiety&neur<br>osis | 1612.11 | Anorexia symptom                                       | eating<br>disorders |
| Eu45317 | [X]Psychogenic diarrhoea                                  | anxiety&neur<br>osis | 1612.00 | Appetite loss - anorexia                               | eating<br>disorders |
| Eu45y11 | [X]Psychogenic<br>dysmenorrhoea                           | anxiety&neur<br>osis | 1FF..00 | Binge eating                                           | eating<br>disorders |
| Eu45318 | [X]Psychogenic dyspepsia                                  | anxiety&neur<br>osis | E275100 | Bulimia (non-organic<br>overeating)                    | eating<br>disorders |
| Eu44412 | [X]Psychogenic dysphonia                                  | anxiety&neur<br>osis | E275111 | Compulsive eating disorder                             | eating<br>disorders |
| Eu45319 | [X]Psychogenic dysuria                                    | anxiety&neur<br>osis | E264200 | Cyclical vomiting -<br>psychogenic                     | eating<br>disorders |
| Eu45320 | [X]Psychogenic flatulence                                 | anxiety&neur<br>osis | ZC2CD00 | Dietary advice for eating<br>disorder                  | eating<br>disorders |
| Eu45323 | [X]Psychogenic freq micturit                              | anxiety&neur<br>osis | 1G2..00 | Dissatisfied with body image                           | eating<br>disorders |
| Eu45413 | [X]Psychogenic headache                                   | anxiety&neur<br>osis | Z7D1200 | Distorted body image                                   | eating<br>disorders |
| Eu45321 | [X]Psychogenic hiccough                                   | anxiety&neur<br>osis | Z4B5.00 | Eating disorder counselling                            | eating<br>disorders |
| Eu45322 | [X]Psychogenic<br>hyperventilat                           | anxiety&neur<br>osis | 1614.00 | Excessive eating -<br>polyphagia                       | eating<br>disorders |
| Eu45y13 | [X]Psychogenic pruritis                                   | anxiety&neur<br>osis | 1467.00 | H/O: anorexia nervosa                                  | eating<br>disorders |
| Eu45325 | [X]Psychogenic<br>pylorospasm                             | anxiety&neur<br>osis | 1614.11 | Hyperalimentation -<br>symptom                         | eating<br>disorders |
| Eu46y16 | [X]Psychogenic syncope                                    | anxiety&neur<br>osis | Fy05.00 | Nocturnal sleep-related<br>eating disorder             | eating<br>disorders |
| Eu45y14 | [X]Psychogenic torticollis                                | anxiety&neur<br>osis | E275z00 | Non-organic eating disorder<br>NOS                     | eating<br>disorders |
| Eu44y14 | [X]Psychogenic twilight state                             | anxiety&neur<br>osis | E275.00 | Other and unspecified non-<br>organic eating disorders | eating<br>disorders |
| Eu45z11 | [X]Psychosomatic disorder<br>NOS                          | anxiety&neur<br>osis | E275y00 | Other specified non-organic<br>eating disorder         | eating<br>disorders |
| Eu43.00 | [X]Reaction to severe stress,<br>and adjustment disorders | anxiety&neur<br>osis | 1614.12 | Polyphagia symptom                                     | eating<br>disorders |
| Eu43z00 | [X]Reaction to severe stress,<br>unspecified              | anxiety&neur<br>osis | 8HTN.00 | Referral to eating disorders<br>clinic                 | eating<br>disorders |
| Eu93000 | [X]Separation anxiety<br>disorder of childhood            | anxiety&neur<br>osis | 9Nk9.00 | Seen in eating disorder clinic                         | eating<br>disorders |
| Eu40214 | [X]Simple phobia                                          | anxiety&neur<br>osis | SN42100 | Starvation                                             | eating<br>disorders |
| Eu93200 | [X]Social anxiety disorder of<br>childhood                | anxiety&neur<br>osis | 1JZ..00 | Suspected binge eating<br>disorder                     | eating<br>disorders |
| Eu40112 | [X]Social neurosis                                        | anxiety&neur<br>osis | E275000 | Unspecified non-organic<br>eating disorder             | eating<br>disorders |
| Eu40100 | [X]Social phobias                                         | anxiety&neur<br>osis | R030.00 | [D]Anorexia                                            | eating<br>disorders |
| Eu45000 | [X]Somatization disorder                                  | anxiety&neur<br>osis | R030z00 | [D]Anorexia NOS                                        | eating<br>disorders |
| Eu45300 | [X]Somatoform autonomic<br>dysfunction                    | anxiety&neur<br>osis | R036011 | [D]Bulimia NOS                                         | eating<br>disorders |
| Eu45z00 | [X]Somatoform disorder,<br>unspecified                    | anxiety&neur<br>osis | R036000 | [D]Excessive eating                                    | eating<br>disorders |
| Eu45.00 | [X]Somatoform disorders                                   | anxiety&neur<br>osis | R036100 | [D]Hyperalimentation                                   | eating<br>disorders |
| Eu45414 | [X]Somatoform pain disorder                               | anxiety&neur<br>osis | R036.00 | [D]Polyphagia                                          | eating<br>disorders |
| Eu40200 | [X]Specific (isolated)<br>phobias                         | anxiety&neur<br>osis | R036z00 | [D]Polyphagia NOS                                      | eating<br>disorders |
| Eu45y15 | [X]Teeth-grinding                                         | anxiety&neur<br>osis | Eu50000 | [X]Anorexia nervosa                                    | eating<br>disorders |
| Eu44300 | [X]Trance and possession<br>disorders                     | anxiety&neur<br>osis | Eu50100 | [X]Atypical anorexia nervosa                           | eating<br>disorders |
| Eu43111 | [X]Traumatic neurosis                                     | anxiety&neur<br>osis | Eu50300 | [X]Atypical bulimia nervosa                            | eating<br>disorders |
| Eu45111 | [X]Undifferentiated<br>psychosomatic disorder             | anxiety&neur<br>osis | Eu50211 | [X]Bulimia NOS                                         | eating<br>disorders |
| Eu45100 | [X]Undifferentiated<br>somatoform disorder                | anxiety&neur<br>osis | Eu50200 | [X]Bulimia nervosa                                     | eating<br>disorders |

|         |                                                              |                       |         |                                             |                       |
|---------|--------------------------------------------------------------|-----------------------|---------|---------------------------------------------|-----------------------|
| Eu50z00 | [X]Eating disorder, unspecified                              | eating disorders      | E2C4.00 | Mixed disturbance of conduct and emotion    | personality disorders |
| Eu50.00 | [X]Eating disorders                                          | eating disorders      | E215100 | Munchausen's syndrome                       | personality disorders |
| Eu50212 | [X]Hyperorexia nervosa                                       | eating disorders      | E21y000 | Narcissistic personality disorder           | personality disorders |
| Eu50y00 | [X]Other eating disorders                                    | eating disorders      | E21y711 | Neurotic personality                        | personality disorders |
| Eu50400 | [X]Overeating associated with other psychological disturbncs | eating disorders      | E21..11 | Neurotic personality disorder               | personality disorders |
| Eu50y11 | [X]Pica in adults                                            | eating disorders      | E214100 | Obsessional personality                     | personality disorders |
| Eu50411 | [X]Psychogenic overeating                                    | eating disorders      | E21yz00 | Other personality disorder NOS              | personality disorders |
| U1B3.11 | [X]Starvation                                                | eating disorders      | E21y.00 | Other personality disorders                 | personality disorders |
| E211.00 | Affective personality disorder                               | personality disorders | E210.00 | Paranoid personality disorder               | personality disorders |
| E211z00 | Affective personality disorder NOS                           | personality disorders | E21y300 | Passive-aggressive personality disorder     | personality disorders |
| E213.11 | Aggressive personality                                       | personality disorders | E2C3100 | Pathological gambling                       | personality disorders |
| E2C0.00 | Aggressive unsocial conduct disorder                         | personality disorders | E21z.00 | Personality disorder NOS                    | personality disorders |
| E217.11 | Amoral personality                                           | personality disorders | E21..00 | Personality disorders                       | personality disorders |
| E214.11 | Anancastic personality                                       | personality disorders | E21y700 | Psychoneurotic personality disorder         | personality disorders |
| E214000 | Anankastic personality                                       | personality disorders | E21z.11 | Psychopathic personality                    | personality disorders |
| E217.00 | Antisocial or sociopathic personality disorder               | personality disorders | E212.00 | Schizoid personality disorder               | personality disorders |
| E216.11 | Asthenic personality                                         | personality disorders | E212z00 | Schizoid personality disorder NOS           | personality disorders |
| E21y100 | Avoidant personality disorder                                | personality disorders | E212200 | Schizotypal personality                     | personality disorders |
| E21y200 | Borderline personality disorder                              | personality disorders | E211000 | Unspecified affective personality disorder  | personality disorders |
| E214z00 | Compulsive personality disorder NOS                          | personality disorders | E215000 | Unspecified histrionic personality disorder | personality disorders |
| E214.00 | Compulsive personality disorders                             | personality disorders | E212000 | Unspecified schizoid personality disorder   | personality disorders |
| E211300 | Cyclothymic personality disorder                             | personality disorders | Eu6y111 | [X] Munchausens syndrome                    | personality disorders |
| E216.12 | Dependent personality                                        | personality disorders | Eu60800 | [X]Addictive personality                    | personality disorders |
| E211200 | Depressive personality disorder                              | personality disorders | Eu94211 | [X]Affectionless psychopathy                | personality disorders |
| E2C..00 | Disturbance of conduct NEC                                   | personality disorders | Eu34011 | [X]Affective personality disorder           | personality disorders |
| E21y400 | Eccentric personality disorder                               | personality disorders | Eu60311 | [X]Aggressive personality disorder          | personality disorders |
| E215200 | Emotionally unstable personality                             | personality disorders | Eu60211 | [X]Amoral personality disorder              | personality disorders |
| E213.00 | Explosive personality disorder                               | personality disorders | Eu60500 | [X]Anankastic personality disorder          | personality disorders |
| E215z00 | Histrionic personality disorder NOS                          | personality disorders | Eu60212 | [X]Antisocial personality disorder          | personality disorders |
| E215.00 | Histrionic personality disorders                             | personality disorders | Eu60600 | [X]Anxious [avoidant] personality disorder  | personality disorders |
| E211100 | Hypomanic personality disorder                               | personality disorders | Eu60213 | [X]Asocial personality disorder             | personality disorders |
| E215.11 | Hysterical personality disorders                             | personality disorders | Eu60711 | [X]Asthenic personality disorder            | personality disorders |
| E21y500 | Immature personality disorder                                | personality disorders | Eu84511 | [X]Autistic psychopathy                     | personality disorders |
| E216.00 | Inadequate personality disorder                              | personality disorders | Eu60312 | [X]Borderline personality disorder          | personality disorders |
| E216.13 | Labile personality                                           | personality disorders | Eu60z11 | [X]Character neurosis NOS                   | personality disorders |
| E21y600 | Masochistic personality disorder                             | personality disorders | Eu62y11 | [X]Chronic pain personality syndrome        | personality disorders |

|         |                                                              |                       |         |                                                                |                        |
|---------|--------------------------------------------------------------|-----------------------|---------|----------------------------------------------------------------|------------------------|
| Eu63011 | [X]Compulsive gambling                                       | personality disorders | Eu6y.00 | [X]Other disorders of adult personality and behaviour          | personality disorders  |
| Eu60511 | [X]Compulsive personality disorder                           | personality disorders | Eu62y00 | [X]Other enduring personality changes                          | personality disorders  |
| Eu34012 | [X]Cycloid personality                                       | personality disorders | Eu63y00 | [X]Other habit and impulse disorders                           | personality disorders  |
| Eu34013 | [X]Cyclothymic personality                                   | personality disorders | Eu60y00 | [X]Other specific personality disorders                        | personality disorders  |
| Eu60700 | [X]Dependent personality disorder                            | personality disorders | Eu6yy00 | [X]Other specified disorders of adult personality/behaviour    | personality disorders  |
| Eu34112 | [X]Depressive personality disorder                           | personality disorders | Eu60000 | [X]Paranoid personality disorder                               | personality disorders  |
| Eu6..00 | [X]Disorders of adult personality and behaviour              | personality disorders | Eu60713 | [X]Passive personality disorder                                | personality disorders  |
| Eu60200 | [X]Dissocial personality disorder                            | personality disorders | Eu63100 | [X]Pathological fire-setting                                   | personality disorders  |
| Eu60y11 | [X]Eccentric personality disorder                            | personality disorders | Eu63000 | [X]Pathological gambling                                       | personality disorders  |
| Eu6y000 | [X]Elaboration of physical symptoms for psychological reason | personality disorders | Eu60z12 | [X]Pathological personality NOS                                | personality disorders  |
| Eu60300 | [X]Emotionally unstable personality disorder                 | personality disorders | Eu63200 | [X]Pathological stealing                                       | personality disorders  |
| Eu62000 | [X]Enduring personality change after catastrophic experience | personality disorders | Eu62013 | [X]Personality change aft prolong captiv+possib/being killed   | personality disorders  |
| Eu62100 | [X]Enduring personality change after psychiatric illness     | personality disorders | Eu62011 | [X]Personality change after concentration camp experiences     | personality disorders  |
| Eu62.00 | [X]Enduring personality change not attrib to brain damag/dis | personality disorders | Eu62012 | [X]Personality change after disasters                          | personality disorders  |
| Eu62z00 | [X]Enduring personality change, unspecified                  | personality disorders | Eu62015 | [X]Personality change after torture                            | personality disorders  |
| Eu60011 | [X]Expansive paranoid personality disorder                   | personality disorders | Eu60z00 | [X]Personality disorder, unspecified                           | personality disorders  |
| Eu60313 | [X]Explosive personality disorder                            | personality disorders | Eu62014 | [X]Personlity chang aft expos life-threat sit/victim/terrorism | personality disorders  |
| Eu6y300 | [X]Factitious disorder                                       | personality disorders | Eu60412 | [X]Psychoinfantile personality disorder                        | personality disorders  |
| Eu63z00 | [X]Habit and impulse disorder, unspecified                   | personality disorders | Eu60y16 | [X]Psychoneurotic personality disorder                         | personality disorders  |
| Eu63.00 | [X]Habit and impulse disorders                               | personality disorders | Eu60214 | [X]Psychopathic personality disorder                           | personality disorders  |
| Eu60y12 | [X]Haltlose type personality disorder                        | personality disorders | Eu60013 | [X]Querulant personality disorder                              | personality disorders  |
| Eu60400 | [X]Histrionic personality disorder                           | personality disorders | Eu60100 | [X]Schizoid personality disorder                               | personality disorders  |
| Eu60411 | [X]Hysterical personality disorder                           | personality disorders | Eu21.18 | [X]Schizotypal personality disorder                            | personality disorders  |
| Eu60y13 | [X]Immature personality disorder                             | personality disorders | Eu60714 | [X]Self defeating personality disorder                         | personality disorders  |
| Eu60712 | [X]Inadequate personality disorder                           | personality disorders | Eu60014 | [X]Sensitive paranoid personality disorder                     | personality disorders  |
| Eu6y100 | [X]Intent product/feign of symptom/disab eith physical/psych | personality disorders | Eu60215 | [X]Sociopathic personality disorder                            | personality disorders  |
| Eu61.00 | [X]Mixed and other personality disorders                     | personality disorders | Eu60.00 | [X]Specific personality disorders                              | personality disorders  |
| Eu6y200 | [X]Munchausen's by proxy                                     | personality disorders | Eu63300 | [X]Trichotillomania                                            | personality disorders  |
| Eu60y14 | [X]Narcissistic personality disorder                         | personality disorders | Eu6z.00 | [X]Unspecified disorder of adult personality and behaviour     | personality disorders  |
| Eu60512 | [X]Obsessional personality disorder                          | personality disorders | E102400 | Acute exacerbation of chronic catatonic schizophrenia          | schizophrenia spectrum |
| Eu60513 | [X]Obsessive-compulsive personality disorder                 | personality disorders | E101400 | Acute exacerbation of chronic hebephrenic schizophrenia        | schizophrenia spectrum |
| Eu60600 | [X]Organic personality disorder                              | personality disorders | E103400 | Acute exacerbation of chronic paranoid schizophrenia           | schizophrenia spectrum |
| Eu60611 | [X]Organic pseudopsychopathic personality                    | personality disorders | E107400 | Acute exacerbation of chronic schizo-affective schizophrenia   | schizophrenia spectrum |

|         |                                                              |                        |         |                                                  |                        |
|---------|--------------------------------------------------------------|------------------------|---------|--------------------------------------------------|------------------------|
| E100400 | Acute exacerbation of chronic schizophrenia                  | schizophrenia spectrum | E105z00 | Latent schizophrenia NOS                         | schizophrenia spectrum |
| E103300 | Acute exacerbation of subchronic paranoid schizophrenia      | schizophrenia spectrum | E105500 | Latent schizophrenia in remission                | schizophrenia spectrum |
| E100300 | Acute exacerbation of subchronic schizophrenia               | schizophrenia spectrum | E1...00 | Non-organic psychoses                            | schizophrenia spectrum |
| E107300 | Acute exacerbation subchronic schizo-affective schizophrenia | schizophrenia spectrum | E1z..00 | Non-organic psychosis NOS                        | schizophrenia spectrum |
| E131.00 | Acute hysterical psychosis                                   | schizophrenia spectrum | E13z.00 | Nonorganic psychosis NOS                         | schizophrenia spectrum |
| E133.00 | Acute paranoid reaction                                      | schizophrenia spectrum | 225F.00 | O/E - delusion of persecution                    | schizophrenia spectrum |
| E104.00 | Acute schizophrenic episode                                  | schizophrenia spectrum | 225E.00 | O/E - paranoid delusions                         | schizophrenia spectrum |
| E10y000 | Atypical schizophrenia                                       | schizophrenia spectrum | E104.11 | Oneirophrenia                                    | schizophrenia spectrum |
| E133.11 | Bouffee delirante                                            | schizophrenia spectrum | E11zz00 | Other affective psychosis NOS                    | schizophrenia spectrum |
| E13y100 | Brief reactive psychosis                                     | schizophrenia spectrum | E11z.00 | Other and unspecified affective psychoses        | schizophrenia spectrum |
| E102.00 | Catatonic schizophrenia                                      | schizophrenia spectrum | E13..00 | Other nonorganic psychoses                       | schizophrenia spectrum |
| E102z00 | Catatonic schizophrenia NOS                                  | schizophrenia spectrum | E12y.00 | Other paranoid states                            | schizophrenia spectrum |
| E102500 | Catatonic schizophrenia in remission                         | schizophrenia spectrum | E12yz00 | Other paranoid states NOS                        | schizophrenia spectrum |
| E10y.11 | Cenesthopathic schizophrenia                                 | schizophrenia spectrum | E13y.00 | Other reactive psychoses                         | schizophrenia spectrum |
| E105200 | Chronic latent schizophrenia                                 | schizophrenia spectrum | E13yz00 | Other reactive psychoses NOS                     | schizophrenia spectrum |
| E121.00 | Chronic paranoid psychosis                                   | schizophrenia spectrum | E10y.00 | Other schizophrenia                              | schizophrenia spectrum |
| E103200 | Chronic paranoid schizophrenia                               | schizophrenia spectrum | E10yz00 | Other schizophrenia NOS                          | schizophrenia spectrum |
| E107200 | Chronic schizo-affective schizophrenia                       | schizophrenia spectrum | E1y..00 | Other specified non-organic psychoses            | schizophrenia spectrum |
| E100200 | Chronic schizophrenic                                        | schizophrenia spectrum | E12y000 | Paranoia querulans                               | schizophrenia spectrum |
| E10y100 | Coenesthopathic schizophrenia                                | schizophrenia spectrum | 1BH3.00 | Paranoid ideation                                | schizophrenia spectrum |
| E107.11 | Cyclic schizophrenia                                         | schizophrenia spectrum | E12z.00 | Paranoid psychosis NOS                           | schizophrenia spectrum |
| 1BH..11 | Delusion                                                     | schizophrenia spectrum | E103.00 | Paranoid schizophrenia                           | schizophrenia spectrum |
| 1BH0.00 | Delusion of persecution                                      | schizophrenia spectrum | E103z00 | Paranoid schizophrenia NOS                       | schizophrenia spectrum |
| 1BH..00 | Delusions                                                    | schizophrenia spectrum | E103500 | Paranoid schizophrenia in remission              | schizophrenia spectrum |
| E141.00 | Disintegrative psychosis                                     | schizophrenia spectrum | E12..00 | Paranoid states                                  | schizophrenia spectrum |
| E123.11 | Folie a deux                                                 | schizophrenia spectrum | E122.00 | Paraphrenia                                      | schizophrenia spectrum |
| 1BH1.00 | Grandiose delusions                                          | schizophrenia spectrum | 286..11 | Poor insight into psychotic condition            | schizophrenia spectrum |
| 146H.00 | H/O: psychosis                                               | schizophrenia spectrum | E134.00 | Psychogenic paranoid psychosis                   | schizophrenia spectrum |
| 1464.00 | H/O: schizophrenia                                           | schizophrenia spectrum | E14..00 | Psychoses with origin in childhood               | schizophrenia spectrum |
| 1B1E.00 | Hallucinations                                               | schizophrenia spectrum | 212X.00 | Psychosis resolved                               | schizophrenia spectrum |
| E101.00 | Hebephrenic schizophrenia                                    | schizophrenia spectrum | 285..11 | Psychotic condition, insight present             | schizophrenia spectrum |
| E101z00 | Hebephrenic schizophrenia NOS                                | schizophrenia spectrum | E13z.11 | Psychotic episode NOS                            | schizophrenia spectrum |
| E101500 | Hebephrenic schizophrenia in remission                       | schizophrenia spectrum | E130.11 | Psychotic reactive depression                    | schizophrenia spectrum |
| 1BH2.00 | Ideas of reference                                           | schizophrenia spectrum | E132.00 | Reactive confusion                               | schizophrenia spectrum |
| E105.00 | Latent schizophrenia                                         | schizophrenia spectrum | E13..11 | Reactive psychoses                               | schizophrenia spectrum |
|         |                                                              |                        | 8HHs.00 | Referral to psychosis early intervention service | schizophrenia spectrum |

|         |                                             |                        |         |                                                                           |                        |
|---------|---------------------------------------------|------------------------|---------|---------------------------------------------------------------------------|------------------------|
| E141100 | Residual disintegrative psychoses           | schizophrenia spectrum | Eu23z00 | [X]Acute and transient psychotic disorder, unspecified                    | schizophrenia spectrum |
| E106.00 | Residual schizophrenia                      | schizophrenia spectrum | Eu23.00 | [X]Acute and transient psychotic disorders                                | schizophrenia spectrum |
| E107.00 | Schizo-affective schizophrenia              | schizophrenia spectrum | Eu23100 | [X]Acute polymorphic psychotic disorder with symptoms of schizophrenia    | schizophrenia spectrum |
| E107z00 | Schizo-affective schizophrenia NOS          | schizophrenia spectrum | Eu23000 | [X]Acute polymorphic psychotic disorder without symptoms of schizophrenia | schizophrenia spectrum |
| E107500 | Schizo-affective schizophrenia in remission | schizophrenia spectrum | Eu23200 | [X]Acute schizophrenia-like psychotic disorder                            | schizophrenia spectrum |
| E10z.00 | Schizophrenia NOS                           | schizophrenia spectrum | Eu20311 | [X]Atypical schizophrenia                                                 | schizophrenia spectrum |
| E100500 | Schizophrenia in remission                  | schizophrenia spectrum | Eu21.12 | [X]Borderline schizophrenia                                               | schizophrenia spectrum |
| 212W.00 | Schizophrenia resolved                      | schizophrenia spectrum | Eu23011 | [X]Bouffée délirante                                                      | schizophrenia spectrum |
| E100.11 | Schizophrenia simplex                       | schizophrenia spectrum | Eu23z11 | [X]Brief reactive psychosis NOS                                           | schizophrenia spectrum |
| E10..00 | Schizophrenic disorders                     | schizophrenia spectrum | Eu23211 | [X]Brief schizophreniform disorder                                        | schizophrenia spectrum |
| ZS7C611 | Schizophrenic language                      | schizophrenia spectrum | Eu23212 | [X]Brief schizophreniform psychosis                                       | schizophrenia spectrum |
| E123.00 | Shared paranoid disorder                    | schizophrenia spectrum | Eu22111 | [X]Capgras syndrome                                                       | schizophrenia spectrum |
| E120.00 | Simple paranoid state                       | schizophrenia spectrum | Eu20200 | [X]Catatonic schizophrenia                                                | schizophrenia spectrum |
| E100.00 | Simple schizophrenia                        | schizophrenia spectrum | Eu20211 | [X]Catatonic stupor                                                       | schizophrenia spectrum |
| E100z00 | Simple schizophrenia NOS                    | schizophrenia spectrum | Eu2y.11 | [X]Chronic hallucinatory psychosis                                        | schizophrenia spectrum |
| E102100 | Subchronic catatonic schizophrenia          | schizophrenia spectrum | Eu20511 | [X]Chronic undifferentiated schizophrenia                                 | schizophrenia spectrum |
| E103100 | Subchronic paranoid schizophrenia           | schizophrenia spectrum | Eu22200 | [X]Cotard syndrome                                                        | schizophrenia spectrum |
| E107100 | Subchronic schizo-affective schizophrenia   | schizophrenia spectrum | Eu25211 | [X]Cyclic schizophrenia                                                   | schizophrenia spectrum |
| E100100 | Subchronic schizophrenia                    | schizophrenia spectrum | Eu23012 | [X]Cycloid psychosis                                                      | schizophrenia spectrum |
| E11z000 | Unspecified affective psychoses NOS         | schizophrenia spectrum | Eu23112 | [X]Cycloid psychosis with symptoms of schizophrenia                       | schizophrenia spectrum |
| E102000 | Unspecified catatonic schizophrenia         | schizophrenia spectrum | Eu22000 | [X]Delusional disorder                                                    | schizophrenia spectrum |
| E101000 | Unspecified hebephrenic schizophrenia       | schizophrenia spectrum | Eu22y11 | [X]Delusional dysmorphophobia                                             | schizophrenia spectrum |
| E105000 | Unspecified latent schizophrenia            | schizophrenia spectrum | Eu22100 | [X]Delusional misidentification syndrome                                  | schizophrenia spectrum |
| E103000 | Unspecified paranoid schizophrenia          | schizophrenia spectrum | Eu84312 | [X]Disintegrative psychosis                                               | schizophrenia spectrum |
| E107000 | Unspecified schizo-affective schizophrenia  | schizophrenia spectrum | Eu20111 | [X]Disorganized schizophrenia                                             | schizophrenia spectrum |
| E100000 | Unspecified schizophrenia                   | schizophrenia spectrum | Eu24.11 | [X]Folie à deux                                                           | schizophrenia spectrum |
| F481K00 | Visual hallucinations                       | schizophrenia spectrum | Eu20100 | [X]Hebephrenic schizophrenia                                              | schizophrenia spectrum |
| R001.00 | [D]Hallucinations                           | schizophrenia spectrum | Eu44.14 | [X]Hysterical psychosis                                                   | schizophrenia spectrum |
| R001z00 | [D]Hallucinations NOS                       | schizophrenia spectrum | Eu24.00 | [X]Induced delusional disorder                                            | schizophrenia spectrum |
| R001000 | [D]Hallucinations, auditory                 | schizophrenia spectrum | Eu24.12 | [X]Induced paranoid disorder                                              | schizophrenia spectrum |
| R001100 | [D]Hallucinations, gustatory                | schizophrenia spectrum | Eu24.13 | [X]Induced psychotic disorder                                             | schizophrenia spectrum |
| R001200 | [D]Hallucinations, olfactory                | schizophrenia spectrum | Eu22y12 | [X]Involutional paranoid state                                            | schizophrenia spectrum |
| R001300 | [D]Hallucinations, tactile                  | schizophrenia spectrum | Eu21.13 | [X]Latent schizophrenia                                                   | schizophrenia spectrum |
| R001400 | [D]Visual hallucinations                    | schizophrenia spectrum | Eu21.11 | [X]Latent schizophrenic reaction                                          | schizophrenia spectrum |
| ZV11000 | [V]Personal history of schizophrenia        | schizophrenia spectrum | Eu25212 | [X]Mixed schizophrenic and affective psychosis                            | schizophrenia spectrum |
| Eu02z12 | [X] Presenile psychosis NOS                 | schizophrenia spectrum |         |                                                                           |                        |



|         |                                                             |                        |         |                                                        |                        |
|---------|-------------------------------------------------------------|------------------------|---------|--------------------------------------------------------|------------------------|
| Eu26.00 | [X]Nonorganic psychosis in remission                        | schizophrenia spectrum | Eu20.00 | [X]Schizophrenia                                       | schizophrenia spectrum |
| Eu23y00 | [X]Other acute and transient psychotic disorders            | schizophrenia spectrum | Eu2.00  | [X]Schizophrenia, schizotypal and delusional disorders | schizophrenia spectrum |
| Eu23300 | [X]Other acute predominantly delusional psychotic disorders | schizophrenia spectrum | Eu20z00 | [X]Schizophrenia, unspecified                          | schizophrenia spectrum |
| Ryu5300 | [X]Other hallucinations                                     | schizophrenia spectrum | Eu20212 | [X]Schizophrenic cataplexy                             | schizophrenia spectrum |
| Eu2y.00 | [X]Other nonorganic psychotic disorders                     | schizophrenia spectrum | Eu20213 | [X]Schizophrenic catatonia                             | schizophrenia spectrum |
| Eu22y00 | [X]Other persistent delusional disorders                    | schizophrenia spectrum | Eu20214 | [X]Schizophrenic flexibilis cerea                      | schizophrenia spectrum |
| Eu25y00 | [X]Other schizoaffective disorders                          | schizophrenia spectrum | Eu23214 | [X]Schizophrenic reaction                              | schizophrenia spectrum |
| Eu20y00 | [X]Other schizophrenia                                      | schizophrenia spectrum | Eu20y12 | [X]Schizophreniform disorder NOS                       | schizophrenia spectrum |
| Eu22015 | [X]Paranoia                                                 | schizophrenia spectrum | Eu25112 | [X]Schizophreniform psychosis, depressive type         | schizophrenia spectrum |
| Eu22y13 | [X]Paranoia querulans                                       | schizophrenia spectrum | Eu25012 | [X]Schizophreniform psychosis, manic type              | schizophrenia spectrum |
| Eu22011 | [X]Paranoid psychosis                                       | schizophrenia spectrum | Eu20y13 | [X]Schizophreniform psychosis NOS                      | schizophrenia spectrum |
| Eu20000 | [X]Paranoid schizophrenia                                   | schizophrenia spectrum | Eu21.00 | [X]Schizotypal disorder                                | schizophrenia spectrum |
| Eu22012 | [X]Paranoid state                                           | schizophrenia spectrum | Eu22014 | [X]Sensitiver Beziehungswahn                           | schizophrenia spectrum |
| Eu22300 | [X]Paranoid state in remission                              | schizophrenia spectrum | Eu20600 | [X]Simple schizophrenia                                | schizophrenia spectrum |
| Eu22013 | [X]Paraphrenia - late                                       | schizophrenia spectrum | Eu84314 | [X]Symbiotic psychosis                                 | schizophrenia spectrum |
| Eu20011 | [X]Paraphrenic schizophrenia                                | schizophrenia spectrum | Eu0z.12 | [X]Symptomatic psychosis NOS                           | schizophrenia spectrum |
| Eu22z00 | [X]Persistent delusional disorder, unspecified              | schizophrenia spectrum | Eu20300 | [X]Undifferentiated schizophrenia                      | schizophrenia spectrum |
| Eu22.00 | [X]Persistent delusional disorders                          | schizophrenia spectrum | Eu2z.00 | [X]Unspecified nonorganic psychosis                    | schizophrenia spectrum |
| Eu20400 | [X]Post-schizophrenic depression                            | schizophrenia spectrum | E274E00 | 'Short-sleeper'                                        | sleep disorders        |
| Eu21.14 | [X]Prepsychotic schizophrenia                               | schizophrenia spectrum | 1B1B.11 | C/O - insomnia                                         | sleep disorders        |
| Eu21.15 | [X]Prodromal schizophrenia                                  | schizophrenia spectrum | 1B1D.00 | C/O nightmares                                         | sleep disorders        |
| Eu21.16 | [X]Pseudoneurotic schizophrenia                             | schizophrenia spectrum | 1B1B.00 | Cannot sleep - insomnia                                | sleep disorders        |
| Eu21.17 | [X]Pseudopsychopathic schizophrenia                         | schizophrenia spectrum | F270.00 | Cataplexy                                              | sleep disorders        |
| Eu23312 | [X]Psychogenic paranoid psychosis                           | schizophrenia spectrum | F27.00  | Cataplexy and narcolepsy                               | sleep disorders        |
| Eu2z.11 | [X]Psychosis NOS                                            | schizophrenia spectrum | F27z.00 | Cataplexy or narcolepsy NOS                            | sleep disorders        |
| Eu53111 | [X]Puerperal psychosis NOS                                  | schizophrenia spectrum | 1BX0.00 | Delayed onset of sleep                                 | sleep disorders        |
| Eu23z12 | [X]Reactive psychosis                                       | schizophrenia spectrum | Fy00.00 | Disorders of initiating and maintaining sleep          | sleep disorders        |
| Eu20500 | [X]Residual schizophrenia                                   | schizophrenia spectrum | Fy02.00 | Disorders of the sleep-wake schedule                   | sleep disorders        |
| Eu25100 | [X]Schizoaffective disorder, depressive type                | schizophrenia spectrum | Z1M1.00 | Disturbing sleep                                       | sleep disorders        |
| Eu25000 | [X]Schizoaffective disorder, manic type                     | schizophrenia spectrum | 1BX1.00 | Excessive sleep                                        | sleep disorders        |
| Eu25200 | [X]Schizoaffective disorder, mixed type                     | schizophrenia spectrum | E274311 | Hypersomnia NOS                                        | sleep disorders        |
| Eu25z00 | [X]Schizoaffective disorder, unspecified                    | schizophrenia spectrum | E274.11 | Hypersomnia of non-organic origin                      | sleep disorders        |
| Eu25.00 | [X]Schizoaffective disorders                                | schizophrenia spectrum | 1B1B000 | Initial insomnia                                       | sleep disorders        |
| Eu25z11 | [X]Schizoaffective psychosis NOS                            | schizophrenia spectrum | E274111 | Insomnia NOS                                           | sleep disorders        |
| Eu25111 | [X]Schizoaffective psychosis, depressive type               | schizophrenia spectrum | E274.12 | Insomnia due to nonorganic sleep disorder              | sleep disorders        |
| Eu25011 | [X]Schizoaffective psychosis, manic type                    | schizophrenia spectrum | E274F00 | Inversion of sleep rhythm                              | sleep disorders        |

|         |                                                 |                 |         |                                                          |                  |
|---------|-------------------------------------------------|-----------------|---------|----------------------------------------------------------|------------------|
| 1B1B200 | Late insomnia                                   | sleep disorders | R005200 | [D]Insomnia NOS                                          | sleep disorders  |
| 1BX9.00 | Light sleep                                     | sleep disorders | R005100 | [D]Insomnia with sleep apnoea                            | sleep disorders  |
| K5A2100 | Menopausal sleeplessness                        | sleep disorders | R005311 | [D]Sleep apnoea syndrome                                 | sleep disorders  |
| 1B1B100 | Middle insomnia                                 | sleep disorders | R005000 | [D]Sleep disturbance, unspecified                        | sleep disorders  |
| F271.00 | Narcolepsy                                      | sleep disorders | R005.00 | [D]Sleep disturbances                                    | sleep disorders  |
| E274900 | Nightmares                                      | sleep disorders | R005z00 | [D]Sleep dysfunction NOS                                 | sleep disorders  |
| 1B1D.11 | Nightmares - symptom                            | sleep disorders | R005900 | [D]Sleep dysfunction with arousal disturbance            | sleep disorders  |
| E274z00 | Non-organic sleep disorder NOS                  | sleep disorders | R005800 | [D]Sleep dysfunction with sleep stage disturbance        | sleep disorders  |
| E274.00 | Non-organic sleep disorders                     | sleep disorders | R005500 | [D]Sleep rhythm inversion                                | sleep disorders  |
| H5B0.00 | Obstructive sleep apnoea                        | sleep disorders | R005600 | [D]Sleep rhythm irregular                                | sleep disorders  |
| Fy03.11 | Obstructive sleep apnoea                        | sleep disorders | R005.12 | [D]Sleep rhythm problems                                 | sleep disorders  |
| 9Ngt.00 | On melatonin for sleep disorder                 | sleep disorders | R005700 | [D]Sleep-wake rhythm non-24-hour cycle                   | sleep disorders  |
| E274y00 | Other non-organic sleep disorder                | sleep disorders | R005312 | [D]Syndrome sleep apnoea                                 | sleep disorders  |
| E274C00 | Other sleep stage or arousal dysfunction        | sleep disorders | ZV1B100 | [V]Personal history of unhealthy sleep-wake schedule     | sleep disorders  |
| E274400 | Persistent hypersomnia                          | sleep disorders | Eu51z11 | [X]Emotional sleep disorder NOS                          | sleep disorders  |
| E274200 | Persistent insomnia                             | sleep disorders | Eu51500 | [X]Nightmares                                            | sleep disorders  |
| 1B1Q.00 | Poor sleep pattern                              | sleep disorders | Eu51200 | [X]Nonorganic disorder of the sleep-wake schedule        | sleep disorders  |
| 8HTn.00 | Referral to sleep clinic                        | sleep disorders | Eu51100 | [X]Nonorganic hypersomnia                                | sleep disorders  |
| E274B00 | Repeated rapid eye movement sleep interruptions | sleep disorders | Eu51000 | [X]Nonorganic insomnia                                   | sleep disorders  |
| E274D00 | Repetitive intrusions of sleep                  | sleep disorders | Eu51z00 | [X]Nonorganic sleep disorder, unspecified                | sleep disorders  |
| F13z200 | Restless legs syndrome                          | sleep disorders | Eu51.00 | [X]Nonorganic sleep disorders                            | sleep disorders  |
| E274D11 | Restless sleep                                  | sleep disorders | Eu51y00 | [X]Other nonorganic sleep disorders                      | sleep disorders  |
| 9Nk0.00 | Seen in sleep clinic                            | sleep disorders | Fyu5800 | [X]Other sleep disorders                                 | sleep disorders  |
| Fy03.00 | Sleep apnoea                                    | sleep disorders | Eu51211 | [X]Psychogenic inversion of circadian rhythm             | sleep disorders  |
| H5B..00 | Sleep apnoea                                    | sleep disorders | Eu51213 | [X]Psychogenic inversion of sleep rhythm                 | sleep disorders  |
| Fy0..00 | Sleep disorders                                 | sleep disorders | Eu51400 | [X]Sleep terrors                                         | sleep disorders  |
| 8G9B.00 | Sleep hygiene behaviour education               | sleep disorders | Eu51300 | [X]Sleepwalking                                          | sleep disorders  |
| 8Q0..00 | Sleep management                                | sleep disorders | J611.00 | Acute alcoholic hepatitis                                | substance misuse |
| A86..11 | Sleeping sickness                               | sleep disorders | E230.00 | Acute alcoholic intoxication in alcoholism               | substance misuse |
| E274700 | Somnambulism - sleep walking                    | sleep disorders | E230z00 | Acute alcoholic intoxication in alcoholism NOS           | substance misuse |
| E274300 | Transient hypersomnia                           | sleep disorders | E230300 | Acute alcoholic intoxication in remission, in alcoholism | substance misuse |
| E274100 | Transient insomnia                              | sleep disorders | E230000 | Acute alcoholic intoxication, unspecified, in alcoholism | substance misuse |
| E274000 | Unspecified non-organic sleep disorder          | sleep disorders | 8Hq..00 | Admission to substance misuse detoxification centre      | substance misuse |
| R005400 | [D]Hypersomnia NOS                              | sleep disorders | 66e0.00 | Alcohol abuse monitoring                                 | substance misuse |
| R005300 | [D]Hypersomnia with sleep apnoea                | sleep disorders | E011.00 | Alcohol amnestic syndrome                                | substance misuse |
| R005.11 | [D]Insomnia - symptom                           | sleep disorders | E011z00 | Alcohol amnestic syndrome NOS                            | substance misuse |

|         |                                                        |                  |         |                                                        |                  |
|---------|--------------------------------------------------------|------------------|---------|--------------------------------------------------------|------------------|
| E23.00  | Alcohol dependence syndrome                            | substance misuse | E244.00 | Amphetamine or other psychostimulant dependence        | substance misuse |
| E23z.00 | Alcohol dependence syndrome NOS                        | substance misuse | E244z00 | Amphetamine or psychostimulant dependence NOS          | substance misuse |
| E230.11 | Alcohol dependence with acute alcoholic intoxication   | substance misuse | E244300 | Amphetamine or psychostimulant dependence in remission | substance misuse |
| Z191.00 | Alcohol detoxification                                 | substance misuse | E244100 | Amphetamine or psychostimulant dependence, continuous  | substance misuse |
| 8BA8.00 | Alcohol detoxification                                 | substance misuse | E244200 | Amphetamine or psychostimulant dependence, episodic    | substance misuse |
| 66e..00 | Alcohol disorder monitoring                            | substance misuse | E244000 | Amphetamine or psychostimulant dependence, unspecified | substance misuse |
| 1B1c.00 | Alcohol induced hallucinations                         | substance misuse | SL97011 | Amphetamine poisoning                                  | substance misuse |
| 136W.00 | Alcohol misuse                                         | substance misuse | 8G32.00 | Aversion therapy - alcoholism                          | substance misuse |
| E010.00 | Alcohol withdrawal delirium                            | substance misuse | E241.13 | Benzodiazepine dependence                              | substance misuse |
| E013.00 | Alcohol withdrawal hallucinosis                        | substance misuse | 136R.00 | Binge drinker                                          | substance misuse |
| E01y000 | Alcohol withdrawal syndrome                            | substance misuse | E243300 | Cannabis dependence in remission                       | substance misuse |
| J671000 | Alcohol-induced chronic pancreatitis                   | substance misuse | E243100 | Cannabis dependence, continuous                        | substance misuse |
| F25B.00 | Alcohol-induced epilepsy                               | substance misuse | E243200 | Cannabis dependence, episodic                          | substance misuse |
| C150500 | Alcohol-induced pseudo-Cushing's syndrome              | substance misuse | E243000 | Cannabis dependence, unspecified                       | substance misuse |
| G555.00 | Alcoholic cardiomyopathy                               | substance misuse | E243z00 | Cannabis drug dependence NOS                           | substance misuse |
| J612.00 | Alcoholic cirrhosis of liver                           | substance misuse | E243.00 | Cannabis type drug dependence                          | substance misuse |
| E012.11 | Alcoholic dementia NOS                                 | substance misuse | F144000 | Cerebellar ataxia due to alcoholism                    | substance misuse |
| F11x011 | Alcoholic encephalopathy                               | substance misuse | F11x000 | Cerebral degeneration due to alcoholism                | substance misuse |
| J610.00 | Alcoholic fatty liver                                  | substance misuse | 1V0A.00 | Chases the dragon                                      | substance misuse |
| J612000 | Alcoholic fibrosis and sclerosis of liver              | substance misuse | E012000 | Chronic alcoholic brain syndrome                       | substance misuse |
| J153.00 | Alcoholic gastritis                                    | substance misuse | J617000 | Chronic alcoholic hepatitis                            | substance misuse |
| J613000 | Alcoholic hepatic failure                              | substance misuse | E231.00 | Chronic alcoholism                                     | substance misuse |
| J617.00 | Alcoholic hepatitis                                    | substance misuse | E231z00 | Chronic alcoholism NOS                                 | substance misuse |
| J613.00 | Alcoholic liver damage unspecified                     | substance misuse | E231300 | Chronic alcoholism in remission                        | substance misuse |
| F394100 | Alcoholic myopathy                                     | substance misuse | E242100 | Cocaine dependence, continuous                         | substance misuse |
| E015.00 | Alcoholic paranoia                                     | substance misuse | E242200 | Cocaine dependence, episodic                           | substance misuse |
| F375.00 | Alcoholic polyneuropathy                               | substance misuse | E242000 | Cocaine dependence, unspecified                        | substance misuse |
| E01..00 | Alcoholic psychoses                                    | substance misuse | E242z00 | Cocaine drug dependence NOS                            | substance misuse |
| E01z.00 | Alcoholic psychosis NOS                                | substance misuse | SL85000 | Cocaine poisoning                                      | substance misuse |
| 13Y8.00 | Alcoholics anonymous                                   | substance misuse | E242.00 | Cocaine type drug dependence                           | substance misuse |
| E23..11 | Alcoholism                                             | substance misuse | E249z00 | Combined drug dependence, excluding opioid, NOS        | substance misuse |
| Z4B1.00 | Alcoholism counselling                                 | substance misuse | E249100 | Combined drug dependence, excluding opioid, continuous | substance misuse |
| E244z11 | Amphetamine or psychostimulant dependence NOS          | substance misuse |         |                                                        |                  |
| E244011 | Amphetamine or psychostimulant dependence, unspecified | substance misuse |         |                                                        |                  |
| SL97000 | Amphetamine poisoning                                  | substance misuse |         |                                                        |                  |

|         |                                                         |                  |         |                                                              |                  |
|---------|---------------------------------------------------------|------------------|---------|--------------------------------------------------------------|------------------|
| E249200 | Combined drug dependence, excluding opioid, episodic    | substance misuse | E24z.00 | Drug dependence NOS                                          | substance misuse |
| E249000 | Combined drug dependence, excluding opioid, unspecified | substance misuse | L183100 | Drug dependence during pregnancy - baby delivered            | substance misuse |
| E249.00 | Combined drug dependence, excluding opioids             | substance misuse | L183300 | Drug dependence during pregnancy - baby not yet delivered    | substance misuse |
| E248.00 | Combined opioid with other drug dependence              | substance misuse | L183z00 | Drug dependence during pregnancy/childbirth/puerperium NOS   | substance misuse |
| E248z00 | Combined opioid with other drug dependence NOS          | substance misuse | 8BAX.00 | Drug dependence home detoxification                          | substance misuse |
| E248100 | Combined opioid with other drug dependence, continuous  | substance misuse | 8I2N.00 | Drug dependence home detoxification contraindicated          | substance misuse |
| E248200 | Combined opioid with other drug dependence, episodic    | substance misuse | L183.00 | Drug dependence in pregnancy, childbirth and the puerperium  | substance misuse |
| E248000 | Combined opioid with other drug dependence, unspecified | substance misuse | 8BAW.00 | Drug dependence self detoxification                          | substance misuse |
| E230100 | Continuous acute alcoholic intoxication in alcoholism   | substance misuse | 8B23.13 | Drug dependence therapy                                      | substance misuse |
| E231100 | Continuous chronic alcoholism                           | substance misuse | 9k50.00 | Drug misuse - enhanced service completed                     | substance misuse |
| E240100 | Continuous opioid dependence                            | substance misuse | 9k5..00 | Drug misuse - enhanced services administration               | substance misuse |
| 13c7.00 | Current drug user                                       | substance misuse | 9kS..00 | Drug misuse assessment declined - enhanced services administ | substance misuse |
| 9N4i.00 | DNA - Did not attend substance misuse clinic            | substance misuse | 9s..00  | Drug misuse clinic administration                            | substance misuse |
| 7P22100 | Delivery of rehabilitation for alcohol addiction        | substance misuse | 9k52.11 | Drug misuse treatment in primary care                        | substance misuse |
| 7P22000 | Delivery of rehabilitation for drug addiction           | substance misuse | 9k52.00 | Drug misuse treatment primary care - enhanced services admin | substance misuse |
| Z192.00 | Dependent drug detoxification                           | substance misuse | E02..00 | Drug psychoses                                               | substance misuse |
| 1TF..00 | Does not use heroin on top of substitution therapy      | substance misuse | E02z.00 | Drug psychosis NOS                                           | substance misuse |
| 8AA..00 | Drug abuse monitoring                                   | substance misuse | 13c..00 | Drug user                                                    | substance misuse |
| 1V0C.00 | Drug addict                                             | substance misuse | E02y400 | Drug-induced personality disorder                            | substance misuse |
| 9G2..11 | Drug addict notific admin                               | substance misuse | 1V6..00 | Drug-related offending behaviour                             | substance misuse |
| 9G21.00 | Drug addict notific to CMO                              | substance misuse | SL97200 | Ecstasy poisoning                                            | substance misuse |
| 9G23.00 | Drug addict re-notif to CMO                             | substance misuse | E24A.00 | Ecstasy type drug dependence                                 | substance misuse |
| 9G22.00 | Drug addict re-notific due                              | substance misuse | E230200 | Episodic acute alcoholic intoxication in alcoholism          | substance misuse |
| 9G24.00 | Drug addict-notify local SMR22                          | substance misuse | E231200 | Episodic chronic alcoholism                                  | substance misuse |
| E24..11 | Drug addiction                                          | substance misuse | E240200 | Episodic opioid dependence                                   | substance misuse |
| 8B2R.00 | Drug addiction detoxification therapy - buprenorphine   | substance misuse | 1283.00 | FH: Drug dependency                                          | substance misuse |
| 8B2N.00 | Drug addiction detoxification therapy - methadone       | substance misuse | 146C.00 | Failed heroin detoxification                                 | substance misuse |
| 8B2Q.00 | Drug addiction maintenance therapy - buprenorphine      | substance misuse | 9HC1.00 | Follow up substance misuse assessment                        | substance misuse |
| 8B2P.00 | Drug addiction maintenance therapy - methadone          | substance misuse | E246.00 | Glue sniffing dependence                                     | substance misuse |
| 9G2Z.00 | Drug addiction notif NOS                                | substance misuse | E246z00 | Glue sniffing dependence NOS                                 | substance misuse |
| 9G2..00 | Drug addiction notification                             | substance misuse | E246100 | Glue sniffing dependence, continuous                         | substance misuse |
| 8B23.00 | Drug addiction therapy                                  | substance misuse | E246200 | Glue sniffing dependence, episodic                           | substance misuse |
| 8B23.11 | Drug addictn therap-methadone                           | substance misuse | E246000 | Glue sniffing dependence, unspecified                        | substance misuse |
| E24..00 | Drug dependence                                         | substance misuse |         |                                                              |                  |

|         |                                         |                  |         |                                                             |                  |
|---------|-----------------------------------------|------------------|---------|-------------------------------------------------------------|------------------|
| 1T00.00 | H/O daily heroin misuse                 | substance misuse | E241200 | Hypnotic or anxiolytic dependence, episodic                 | substance misuse |
| 1TD0.00 | H/O daily opiate misuse                 | substance misuse | 9NX2.00 | In-house substance misuse treatment                         | substance misuse |
| 1T90.00 | H/O daily solvent misuse                | substance misuse | 9HC0.00 | Initial substance misuse assessment                         | substance misuse |
| 1T0..00 | H/O heroin misuse                       | substance misuse | 13c0.00 | Injecting drug user                                         | substance misuse |
| 1T42.00 | H/O infrequent amphetamine misuse       | substance misuse | 1V30.00 | Injects drugs subcutaneously                                | substance misuse |
| 1T52.00 | H/O infrequent cocaine misuse           | substance misuse | E250.14 | Intoxication - alcohol                                      | substance misuse |
| 1T62.00 | H/O infrequent crack cocaine misuse     | substance misuse | 13c1.00 | Intravenous drug user                                       | substance misuse |
| 1T03.00 | H/O infrequent heroin misuse            | substance misuse | E011000 | Korsakov's alcoholic psychosis                              | substance misuse |
| 1TD2.00 | H/O infrequent opiate misuse            | substance misuse | E011100 | Korsakov's alcoholic psychosis with peripheral neuritis     | substance misuse |
| 1T92.00 | H/O infrequent solvent misuse           | substance misuse | E245.11 | LSD dependence                                              | substance misuse |
| 1TG..00 | H/O novel psychoactive substance misuse | substance misuse | E253.12 | LSD reaction                                                | substance misuse |
| 1TD..00 | H/O opiate misuse                       | substance misuse | 1V01.00 | Long-term drug misuser                                      | substance misuse |
| 1T9..00 | H/O solvent misuse                      | substance misuse | E245.12 | Lysergic acid diethylamide dependence                       | substance misuse |
| 1T41.00 | H/O weekly amphetamine misuse           | substance misuse | E243.13 | Marihuana dependence                                        | substance misuse |
| 1T51.00 | H/O weekly cocaine misuse               | substance misuse | E240.12 | Methadone dependence                                        | substance misuse |
| 1T61.00 | H/O weekly crack cocaine misuse         | substance misuse | Z1Q6200 | Methadone maintenance                                       | substance misuse |
| 1T01.00 | H/O weekly heroin misuse                | substance misuse | Z1Q6212 | Methadone therapy                                           | substance misuse |
| 1TD1.00 | H/O weekly opiate misuse                | substance misuse | E259400 | Misuse of prescription only drugs                           | substance misuse |
| 1T91.00 | H/O weekly solvent misuse               | substance misuse | 13cB.00 | Misuses drugs orally                                        | substance misuse |
| 1462.00 | H/O: alcoholism                         | substance misuse | SL50500 | Morphine poisoning                                          | substance misuse |
| 146F.00 | H/O: drug abuse                         | substance misuse | E25..00 | Nondependent abuse of drugs                                 | substance misuse |
| 1463.00 | H/O: drug dependency                    | substance misuse | E250.00 | Nondependent alcohol abuse                                  | substance misuse |
| E245.00 | Hallucinogen dependence                 | substance misuse | E250z00 | Nondependent alcohol abuse NOS                              | substance misuse |
| E245z00 | Hallucinogen dependence NOS             | substance misuse | E250300 | Nondependent alcohol abuse in remission                     | substance misuse |
| E245100 | Hallucinogen dependence, continuous     | substance misuse | E250100 | Nondependent alcohol abuse, continuous                      | substance misuse |
| E245200 | Hallucinogen dependence, episodic       | substance misuse | E250200 | Nondependent alcohol abuse, episodic                        | substance misuse |
| E245000 | Hallucinogen dependence, unspecified    | substance misuse | E250000 | Nondependent alcohol abuse, unspecified                     | substance misuse |
| 136T.00 | Harmful alcohol use                     | substance misuse | E257.00 | Nondependent amphetamine or other psychostimulant abuse     | substance misuse |
| E243.11 | Hashish dependence                      | substance misuse | E257z00 | Nondependent amphetamine or psychostimulant abuse NOS       | substance misuse |
| 136S.00 | Hazardous alcohol use                   | substance misuse | E257200 | Nondependent amphetamine or psychostimulant abuse, episodic | substance misuse |
| 1V0E.00 | Health problem secondary to drug misuse | substance misuse | E257300 | Nondependent amphetamine/psychostimulant abuse in remission | substance misuse |
| E240.11 | Heroin dependence                       | substance misuse | E257100 | Nondependent amphetamine/psychostimulant abuse, continuous  | substance misuse |
| Z1Q6214 | Heroin maintenance                      | substance misuse | E257000 | Nondependent amphetamine/psychostimulant abuse, unspecified | substance misuse |
| 1V65.00 | Heroin misuse                           | substance misuse |         |                                                             |                  |
| SL50100 | Heroin poisoning                        | substance misuse |         |                                                             |                  |
| 1T...00 | History of substance misuse             | substance misuse |         |                                                             |                  |

|         |                                                 |                  |         |                                                             |                  |
|---------|-------------------------------------------------|------------------|---------|-------------------------------------------------------------|------------------|
| E258.00 | Nondependent antidepressant type drug abuse     | substance misuse | E25y200 | Nondependent other drug abuse, episodic                     | substance misuse |
| E258z00 | Nondependent antidepressant type drug abuse NOS | substance misuse | E25y000 | Nondependent other drug abuse, unspecified                  | substance misuse |
| E252.00 | Nondependent cannabis abuse                     | substance misuse | 1V07.00 | Notified addict                                             | substance misuse |
| E252z00 | Nondependent cannabis abuse NOS                 | substance misuse | 13cM000 | Novel psychoactive substance misuse                         | substance misuse |
| E252100 | Nondependent cannabis abuse, continuous         | substance misuse | 2577.11 | O/E - alcoholic breath                                      | substance misuse |
| E252200 | Nondependent cannabis abuse, episodic           | substance misuse | G852300 | Oesophageal varices in alcoholic cirrhosis of the liver     | substance misuse |
| E252000 | Nondependent cannabis abuse, unspecified        | substance misuse | 9HCC.00 | On substance misuse programme                               | substance misuse |
| E256.00 | Nondependent cocaine abuse                      | substance misuse | SL50.00 | Opiate and narcotic poisoning                               | substance misuse |
| E256z00 | Nondependent cocaine abuse NOS                  | substance misuse | SL50.12 | Opiate poisoning                                            | substance misuse |
| E256300 | Nondependent cocaine abuse in remission         | substance misuse | 8B2S.00 | Opioid agonist substitution therapy                         | substance misuse |
| E256100 | Nondependent cocaine abuse, continuous          | substance misuse | 8B2T.00 | Opioid antagonist therapy                                   | substance misuse |
| E256200 | Nondependent cocaine abuse, episodic            | substance misuse | E240z00 | Opioid drug dependence NOS                                  | substance misuse |
| E256000 | Nondependent cocaine abuse, unspecified         | substance misuse | E240.00 | Opioid type drug dependence                                 | substance misuse |
| E253.00 | Nondependent hallucinogen abuse                 | substance misuse | E240.14 | Opium dependence                                            | substance misuse |
| E253z00 | Nondependent hallucinogen abuse NOS             | substance misuse | E012.00 | Other alcoholic dementia                                    | substance misuse |
| E253300 | Nondependent hallucinogen abuse in remission    | substance misuse | E01y.00 | Other alcoholic psychosis                                   | substance misuse |
| E253100 | Nondependent hallucinogen abuse, continuous     | substance misuse | E02y.00 | Other drug psychoses                                        | substance misuse |
| E253200 | Nondependent hallucinogen abuse, episodic       | substance misuse | E02yz00 | Other drug psychoses NOS                                    | substance misuse |
| E253000 | Nondependent hallucinogen abuse, unspecified    | substance misuse | E247.00 | Other specified drug dependence                             | substance misuse |
| E259.00 | Nondependent mixed drug abuse                   | substance misuse | E247z00 | Other specified drug dependence NOS                         | substance misuse |
| E259z00 | Nondependent mixed drug abuse NOS               | substance misuse | E247100 | Other specified drug dependence, continuous                 | substance misuse |
| E259300 | Nondependent mixed drug abuse in remission      | substance misuse | E247200 | Other specified drug dependence, episodic                   | substance misuse |
| E259100 | Nondependent mixed drug abuse, continuous       | substance misuse | E247000 | Other specified drug dependence, unspecified                | substance misuse |
| E259200 | Nondependent mixed drug abuse, episodic         | substance misuse | E014.00 | Pathological alcohol intoxication                           | substance misuse |
| E259000 | Nondependent mixed drug abuse, unspecified      | substance misuse | 13cH.00 | Persistent substance misuse                                 | substance misuse |
| E255.00 | Nondependent opioid abuse                       | substance misuse | 9k53.11 | Pharmacy attended for drug misuse                           | substance misuse |
| E255z00 | Nondependent opioid abuse NOS                   | substance misuse | 9k53.00 | Pharmacy attended for drug misuse - enhanced services admin | substance misuse |
| E255300 | Nondependent opioid abuse in remission          | substance misuse | 1V02.00 | Poly-drug misuser                                           | substance misuse |
| E255100 | Nondependent opioid abuse, continuous           | substance misuse | L183.11 | Pregnancy and drug dependence                               | substance misuse |
| E255200 | Nondependent opioid abuse, episodic             | substance misuse | 13cF.00 | Preoccupied with substance misuse                           | substance misuse |
| E255000 | Nondependent opioid abuse, unspecified          | substance misuse | 1T43.00 | Previous history of amphetamine misuse                      | substance misuse |
| E25y.00 | Nondependent other drug abuse                   | substance misuse | 1T53.00 | Previous history of cocaine misuse                          | substance misuse |
| E25yz00 | Nondependent other drug abuse NOS               | substance misuse | 1T63.00 | Previous history of crack cocaine misuse                    | substance misuse |
| E25y300 | Nondependent other drug abuse in remission      | substance misuse | 1T02.00 | Previous history of heroin misuse                           | substance misuse |
| E25y100 | Nondependent other drug abuse, continuous       | substance misuse | 1TD3.00 | Previous history of opiate misuse                           | substance misuse |
|         |                                                 |                  | 1T93.00 | Previous history of solvent misuse                          | substance misuse |

|         |                                                             |                  |         |                                                                      |                  |
|---------|-------------------------------------------------------------|------------------|---------|----------------------------------------------------------------------|------------------|
| 13cE.00 | Prolonged high dose use of cannabis                         | substance misuse | 9HC9.00 | Substance misuse treatment programme del other healththcare provider | substance misuse |
| E257.11 | Psychostimulant abuse                                       | substance misuse | 1369.00 | Suspect alcohol abuse - denied                                       | substance misuse |
| E244.11 | Psychostimulant dependence                                  | substance misuse | 1J11.00 | Suspected abuse hard drugs                                           | substance misuse |
| 8W2.00  | Refer to MH services deferred until alcohol misuse resolved | substance misuse | 1J10.00 | Suspected abuse soft drugs                                           | substance misuse |
| 8H7p.00 | Referral to community alcohol team                          | substance misuse | 1J1.00  | Suspected drug abuse                                                 | substance misuse |
| 8IEA.00 | Referral to community alcohol team declined                 | substance misuse | E231000 | Unspecified chronic alcoholism                                       | substance misuse |
| 8HHe.00 | Referral to community drug and alcohol team                 | substance misuse | E240000 | Unspecified opioid dependence                                        | substance misuse |
| 8HHL.00 | Referral to community drug dependency team                  | substance misuse | 1TE.00  | Uses heroin on top of substitution therapy                           | substance misuse |
| 8H7x.00 | Referral to drug abuse counsellor                           | substance misuse | E011200 | Wernicke-Korsakov syndrome                                           | substance misuse |
| 8HI5.00 | Referral to drugs therapist                                 | substance misuse | R10B200 | [D]Finding of psychotropic drug in blood                             | substance misuse |
| 8HkG.00 | Referral to specialist alcohol treatment service            | substance misuse | ZV6D600 | [V]Alcohol abuse counselling and surveillance                        | substance misuse |
| 8HkF.00 | Referral to substance misuse service                        | substance misuse | ZV6D700 | [V]Drug abuse counselling and surveillance                           | substance misuse |
| 8BE0.00 | Reinduction to methadone maintenance therapy                | substance misuse | ZV11300 | [V]Personal history of alcoholism                                    | substance misuse |
| 9N1yJ00 | Seen in drug misuse clinic                                  | substance misuse | ZV11500 | [V]Personal history of drug abuse by injection                       | substance misuse |
| 9No5.00 | Seen in substance misuse clinic                             | substance misuse | ZV11400 | [V]Personal history of psychoactive substance abuse                  | substance misuse |
| 8Hh1.00 | Self referral to substance misuse service                   | substance misuse | U1A5.11 | [X]Accidental poisoning with heroin                                  | substance misuse |
| 9k51.11 | Shared care drug misuse treatment                           | substance misuse | Eu10211 | [X]Alcohol addiction                                                 | substance misuse |
| 9k51.00 | Shared care drug misuse treatment - enhanced services admin | substance misuse | Eu10800 | [X]Alcohol withdrawal-induced seizure                                | substance misuse |
| 1V35.00 | Shares drug equipment                                       | substance misuse | Eu10711 | [X]Alcoholic dementia NOS                                            | substance misuse |
| 1V08.00 | Smokes drugs in cigarette form                              | substance misuse | Eu10511 | [X]Alcoholic hallucinosis                                            | substance misuse |
| 1V09.00 | Smokes drugs through a pipe                                 | substance misuse | Eu10512 | [X]Alcoholic jealousy                                                | substance misuse |
| 1V0B.00 | Sniffs drugs                                                | substance misuse | Eu10513 | [X]Alcoholic paranoia                                                | substance misuse |
| E257.12 | Stimulant abuse                                             | substance misuse | Eu10514 | [X]Alcoholic psychosis NOS                                           | substance misuse |
| E244.12 | Stimulant dependence                                        | substance misuse | Eu10712 | [X]Chronic alcoholic brain syndrome                                  | substance misuse |
| 13cM.00 | Substance misuse                                            | substance misuse | Eu10212 | [X]Chronic alcoholism                                                | substance misuse |
| 9HC2.00 | Substance misuse clinical management plan agreed            | substance misuse | Eu11311 | [X]Cold turkey, opiate withdrawal                                    | substance misuse |
| 9HC3.00 | Substance misuse clinical management plan reviewed          | substance misuse | Eu10411 | [X]Delirium tremens, alcohol induced                                 | substance misuse |
| 8BAc.00 | Substance misuse management stopped - self withdrawal       | substance misuse | Eu12211 | [X]Drug addiction - cannabis                                         | substance misuse |
| 9HC.00  | Substance misuse monitoring                                 | substance misuse | Eu14211 | [X]Drug addiction - cocaine                                          | substance misuse |
| 9HCA.00 | Substance misuse monitoring 6 month review                  | substance misuse | Eu16211 | [X]Drug addiction - hallucinogen                                     | substance misuse |
| 677T.00 | Substance misuse structured counselling                     | substance misuse | Eu11211 | [X]Drug addiction - opioids                                          | substance misuse |
| 9HC6.00 | Substance misuse treatment declined                         | substance misuse | Eu18211 | [X]Drug addiction - solvent                                          | substance misuse |
| 9HC5.00 | Substance misuse treatment programme completed              | substance misuse | Eu19211 | [X]Drug addiction NOS                                                | substance misuse |
| 9HC4.00 | Substance misuse treatment withdrawn                        | substance misuse | Eu13211 | [X]Drug addiction- sedative / hypnotics                              | substance misuse |
|         |                                                             |                  | Eu15211 | [X]Drug addiction-other stimulant                                    | substance misuse |

|         |                                                               |                  |         |                                                              |                  |
|---------|---------------------------------------------------------------|------------------|---------|--------------------------------------------------------------|------------------|
| U81..00 | [X]Evid of alcohol involv determind by level of intoxication  | substance misuse | Eu16500 | [X]Mental & behav dis due to hallucinogens: psychotic disord | substance misuse |
| Eu11212 | [X]Heroin addiction                                           | substance misuse | Eu13500 | [X]Mental & behav dis due to seds/hypntcs: psychotic disordr | substance misuse |
| Eu10611 | [X]Korsakov's psychosis, alcohol induced                      | substance misuse | Eu10000 | [X]Mental & behav dis due to use alcohol: acute intoxication | substance misuse |
| Eu14700 | [X]Men & beh dis due cocaine: resid & late-onset psychot dis  | substance misuse | Eu10500 | [X]Mental & behav dis due to use alcohol: psychotic disorder | substance misuse |
| Eu11700 | [X]Men & beh dis due opioids: resid & late-onset psychot dis  | substance misuse | Eu14500 | [X]Mental & behav dis due to use cocaine: psychotic disorder | substance misuse |
| Eu18400 | [X]Men & beh dis vol solvents: withdrawal state wth delirium  | substance misuse | Eu11500 | [X]Mental & behav dis due to use opioids: psychotic disorder | substance misuse |
| Eu10700 | [X]Men & behav dis due alcoh: resid & late-onset psychot dis  | substance misuse | Eu18500 | [X]Mental & behav dis due to vol solvents: psychotic disordr | substance misuse |
| Eu10400 | [X]Men & behav dis due alcoh: withdrawal state with delirium  | substance misuse | Eu15.00 | [X]Mental & behav disorder due other stimulants inc caffein  | substance misuse |
| Eu11400 | [X]Men & behav dis due opioid: withdrawal state with delirium | substance misuse | Eu18.00 | [X]Mental & behav disorders due to use of volatile solvents  | substance misuse |
| Eu10y00 | [X]Men & behav dis due to use alcohol: oth men & behav dis    | substance misuse | Eu12300 | [X]Mental and behav dis due cannabinoids: withdrawal state   | substance misuse |
| Eu11y00 | [X]Men & behav dis due to use opioids: oth men & behav dis    | substance misuse | Eu16300 | [X]Mental and behav dis due hallucinogens: withdrawal state  | substance misuse |
| Eu19.00 | [X]Men & behav disorder multiple drug use/psychoactive subst  | substance misuse | Eu13300 | [X]Mental and behav dis due seds/hypntcs: withdrawal state   | substance misuse |
| Eu19y00 | [X]Men/beh dis mlt drg use/oth psy sbs: oth men & behav dis   | substance misuse | Eu12200 | [X]Mental and behav dis due to cannabinoids: dependence synd | substance misuse |
| Eu19700 | [X]Men/beh dis mlt drg use/oth subs: resid/late psychot dis   | substance misuse | Eu16200 | [X]Mental and behav dis due to hallucinogens: dependence syn | substance misuse |
| Eu12y00 | [X]Men/behav dis due to use cannabinoids: oth men/behav disd  | substance misuse | Eu13200 | [X]Mental and behav dis due to seds/hypntcs: dependence synd | substance misuse |
| Eu10z00 | [X]Ment & behav dis due use alcohol: unsp ment & behav dis    | substance misuse | Eu10600 | [X]Mental and behav dis due to use alcohol: amnesic syndrome | substance misuse |
| Eu11z00 | [X]Ment & behav dis due use opioids: unsp ment & behav dis    | substance misuse | Eu10200 | [X]Mental and behav dis due to use alcohol: dependence syndr | substance misuse |
| Eu1Az00 | [X]Ment behav dis due crack cocaine: unsp ment and behav dis  | substance misuse | Eu10300 | [X]Mental and behav dis due to use alcohol: withdrawal state | substance misuse |
| Eu19z00 | [X]Ment/beh dis multi drug use/oth psy sbs unsp mnt/beh dis   | substance misuse | Eu12600 | [X]Mental and behav dis due to use cannabinoids: amnesic syn | substance misuse |
| Eu15z00 | [X]Ment/beh dis oth stims inc caffeine: unsp ment/behav disd  | substance misuse | Eu12100 | [X]Mental and behav dis due to use cannabinoids: harmful use | substance misuse |
| Eu12z00 | [X]Ment/behav dis due use cannabinoids: unsp ment/behav disd  | substance misuse | Eu14200 | [X]Mental and behav dis due to use cocaine: dependence syndr | substance misuse |
| Eu16z00 | [X]Ment/behav dis due use hallucinogens: unsp ment/behav dis  | substance misuse | Eu14300 | [X]Mental and behav dis due to use cocaine: withdrawal state | substance misuse |
| Eu18z00 | [X]Ment/behav dis due use vol solvents: unsp ment/behav dis   | substance misuse | Eu16100 | [X]Mental and behav dis due to use hallucinogens: harmfl use | substance misuse |
| Eu19500 | [X]Ment/behav dis mlti drug use/oth psyc sbs: psychotc dis    | substance misuse | Eu10100 | [X]Mental and behav dis due to use of alcohol: harmful use   | substance misuse |
| Eu12500 | [X]Mental & behav dis due to cannabinoids: psychotic disordr  | substance misuse |         |                                                              |                  |



|         |                                                               |                  |         |                                                              |                  |
|---------|---------------------------------------------------------------|------------------|---------|--------------------------------------------------------------|------------------|
| Eu14100 | [X]Mental and behav dis due to use of cocaine: harmful use    | substance misuse | Eu12.00 | [X]Mental and behavioural disorders due to use cannabinoids  | substance misuse |
| Eu11100 | [X]Mental and behav dis due to use of opioids: harmful use    | substance misuse | Eu16.00 | [X]Mental and behavioural disorders due to use hallucinogens | substance misuse |
| Eu11600 | [X]Mental and behav dis due to use opioids: amnesic syndrome  | substance misuse | Eu10.00 | [X]Mental and behavioural disorders due to use of alcohol    | substance misuse |
| Eu11200 | [X]Mental and behav dis due to use opioids: dependence syndr  | substance misuse | Eu14.00 | [X]Mental and behavioural disorders due to use of cocaine    | substance misuse |
| Eu11300 | [X]Mental and behav dis due to use opioids: withdrawal state  | substance misuse | Eu11.00 | [X]Mental and behavioural disorders due to use of opioids    | substance misuse |
| Eu13100 | [X]Mental and behav dis due to use sedts/hypntcs: harmful use | substance misuse | Eu1A.00 | [X]Mental and behavioural disorders due use of crack cocaine | substance misuse |
| Eu18200 | [X]Mental and behav dis due to vol solvents: dependence synd  | substance misuse | Eu1A500 | [X]Mental behav disord due crack cocaine: psychotic disorder | substance misuse |
| Eu18100 | [X]Mental and behav dis due volatile solvents: harmful use    | substance misuse | Eu1A300 | [X]Mental behav disord due crack cocaine: withdrawal state   | substance misuse |
| Eu19100 | [X]Mental and behav dis mlti drg/oth psychoa sbs: harmfl use  | substance misuse | Eu1A200 | [X]Mental behav disorders due use crack cocaine: depend synd | substance misuse |
| Eu19200 | [X]Mental and behav dis mlti/oth psych sbs: dependence syndr  | substance misuse | Eu1A100 | [X]Mental behav disorders due use crack cocaine: harmful use | substance misuse |
| Eu19300 | [X]Mental and behav dis mlti/oth psychoa sbs: withdrwl state  | substance misuse | Eu19600 | [X]Mental/behav dis multi drg use/oth psy sbs: amnesic syndr | substance misuse |
| Eu15200 | [X]Mental and behav dis oth stim inc caffen: dependnce synd   | substance misuse | Eu12700 | [X]Mnt/bh dis due cannabinds: resid & late-onset psychot dis | substance misuse |
| Eu13.00 | [X]Mental and behavioural dis due use sedatives/hypnotics     | substance misuse | Eu16700 | [X]Mnt/bh dis due hallucngns: resid & late-onset psychot dis | substance misuse |
| Eu1..00 | [X]Mental and behavioural disorders due to psychoactive subs  | substance misuse | Eu19400 | [X]Mnt/bh dis mlti drg use/oth psy sbs: wthdr state + dlrium | substance misuse |
|         |                                                               |                  | Eu16711 | [X]Post hallucinogen perception disorder                     | substance misuse |

**eTable 6. Medical Code IDs and Terms Used for Identifying Psychiatric Illnesses in CPRD**

Aurum

| Medical Code ID  | Term                                                                                | Category            |                  |                                                              |                     |
|------------------|-------------------------------------------------------------------------------------|---------------------|------------------|--------------------------------------------------------------|---------------------|
| 481850015        | Agitated                                                                            | affective disorders | 4767311000006117 | Bipolar affective disorder, current episode mixed            | affective disorders |
| 474171000006112  | Agitated depression                                                                 | affective disorders | 513751000006117  | Bipolar affective disorder, currently depressed              | affective disorders |
| 138421012        | Agitated depression                                                                 | affective disorders | 294868016        | Bipolar affective disorder, currently depressed, NOS         | affective disorders |
| 1771531000006110 | Antenatal depression                                                                | affective disorders | 294862015        | Bipolar affective disorder, currently depressed, mild        | affective disorders |
| 294655014        | Arteriosclerotic dementia with depression                                           | affective disorders | 294863013        | Bipolar affective disorder, currently depressed, moderate    | affective disorders |
| 294894013        | Atypical depressive disorder                                                        | affective disorders | 294861010        | Bipolar affective disorder, currently depressed, unspecified | affective disorders |
| 294893019        | Atypical manic disorder                                                             | affective disorders | 513801000006112  | Bipolar affective disorder, currently manic                  | affective disorders |
| 6357571000006119 | Bipolar 1 disorder                                                                  | affective disorders | 294858014        | Bipolar affective disorder, currently manic, NOS             | affective disorders |
| 3854401000006113 | Bipolar 2 disorder                                                                  | affective disorders | 513811000006110  | Bipolar affective disorder, currently manic, full remission  | affective disorders |
| 3301331000006119 | Bipolar I disorder, most recent episode depressed, in partial remission             | affective disorders | 294849019        | Bipolar affective disorder, currently manic, mild            | affective disorders |
| 3006671000006118 | Bipolar I disorder, most recent episode hypomanic                                   | affective disorders | 294850019        | Bipolar affective disorder, currently manic, moderate        | affective disorders |
| 3528681000006111 | Bipolar I disorder, most recent episode manic, in partial remission                 | affective disorders | 294848010        | Bipolar affective disorder, currently manic, unspecified     | affective disorders |
| 2761681000006119 | Bipolar I disorder, most recent episode mixed                                       | affective disorders | 513861000006113  | Bipolar affective disorder, now depressed, in full remission | affective disorders |
| 513691000006116  | Bipolar affect disord, currently manic, severe, no psychosis                        | affective disorders | 3174071000006116 | Bipolar disorder, full remission                             | affective disorders |
| 513701000006116  | Bipolar affect disord, currently manic, severe with psychosis                       | affective disorders | 3886291000006119 | Bipolar disorder, in remission                               | affective disorders |
| 513711000006118  | Bipolar affect disord, now depressed, part/unspec remission                         | affective disorders | 2590511000006116 | Bipolar disorder, partial remission                          | affective disorders |
| 513721000006114  | Bipolar affect disord, now depressed, severe with psychosis                         | affective disorders | 513871000006118  | Bipolar psychoses                                            | affective disorders |
| 513731000006112  | Bipolar affect disord, now depressed, severe, no psychosis                          | affective disorders | 525921000006119  | Brief depressive reaction                                    | affective disorders |
| 513741000006119  | Bipolar affect disord, currently manic, part/unspec remission                       | affective disorders | 295494011        | Brief depressive reaction NOS                                | affective disorders |
| 1975941000006115 | Bipolar affect disorder cur epi mild or moderate depressn, with somatic syndrome    | affective disorders | 407062014        | C/O - feeling depressed                                      | affective disorders |
| 1975931000006113 | Bipolar affect disorder cur epi mild or moderate depressn, without somatic syndrome | affective disorders | 407066012        | C/O - feeling unhappy                                        | affective disorders |
| 492761000000114  | Bipolar affective disorder resolved                                                 | affective disorders | 454064011        | C/O weepiness                                                | affective disorders |
|                  |                                                                                     |                     | 295537016        | Chronic depression                                           | affective disorders |
|                  |                                                                                     |                     | 6550791000006111 | Counseling for postnatal depression                          | affective disorders |
|                  |                                                                                     |                     | 6550801000006112 | Counselling for postnatal depression                         | affective disorders |
|                  |                                                                                     |                     | 3071801000006112 | Depressed                                                    | affective disorders |
|                  |                                                                                     |                     | 2164006016       | Depressed                                                    | affective disorders |

|                   |                                               |                     |                  |                                                              |                     |
|-------------------|-----------------------------------------------|---------------------|------------------|--------------------------------------------------------------|---------------------|
| 2164005017        | Depressed mood                                | affective disorders | 2809821000006115 | Major depression, single episode, in complete remission      | affective disorders |
| 882671000006112   | Depression                                    | affective disorders | 2809831000006117 | Major depression, single episode, in full remission          | affective disorders |
| 226411000000110   | Depression - enhanced services administration | affective disorders | 3650771000006113 | Major depression, single episode, in partial remission       | affective disorders |
| 882681000006110   | Depression NOS                                | affective disorders | 3094951000006111 | Major depressive disorder, single episode                    | affective disorders |
| 2534096013        | Depression annual review                      | affective disorders | 882321000006119  | Mania/hypomania                                              | affective disorders |
| 8245201000006115  | Depression care management                    | affective disorders | 401765010        | Manic disorder, single episode                               | affective disorders |
| 1823881000006110  | Depression confirmed                          | affective disorders | 294809010        | Manic disorder, single episode NOS                           | affective disorders |
| 2534091015        | Depression interim review                     | affective disorders | 2157096015       | Manic mood                                                   | affective disorders |
| 6649631000006118  | Depression management program                 | affective disorders | 223601000000119  | Manic psychoses                                              | affective disorders |
| 1773563015        | Depression management programme               | affective disorders | 294860011        | Manic-depressive - now depressed                             | affective disorders |
| 2534092010        | Depression medication review                  | affective disorders | 294847017        | Manic-depressive - now manic                                 | affective disorders |
| 294621000000118   | Depression resolved                           | affective disorders | 346973011        | Masked depression                                            | affective disorders |
| 295535012         | Depressive disorder NEC                       | affective disorders | 2620391000000111 | Maternal postnatal depression                                | affective disorders |
| 12727931000006110 | Depressive disorder NEC                       | affective disorders | 306153015        | Mental disorder during pregnancy - baby not yet delivered    | affective disorders |
| 8460861000006115  | Depressive personality disorder               | affective disorders | 705571000006116  | Mental disorder in puerperium - baby previously delivered    | affective disorders |
| 613791000006115   | Depressive psychoses                          | affective disorders | 306152013        | Mental disorder in the puerperium - baby delivered           | affective disorders |
| 1494612017        | Depressive symptoms                           | affective disorders | 705591000006115  | Mental disorders in pregnancy, childbirth and the puerperium | affective disorders |
| 4763361000006113  | Drug-induced depression                       | affective disorders | 6000691000006114 | Mild depression                                              | affective disorders |
| 135278017         | Elevated mood                                 | affective disorders | 882811000006119  | Mild depression                                              | affective disorders |
| 441826016         | Endogenous depression                         | affective disorders | 3789581000006112 | Mild major depression, single episode                        | affective disorders |
| 410861011         | Endogenous depression - recurrent             | affective disorders | 294869012        | Mixed bipolar affective disorder                             | affective disorders |
| 642461000006116   | Endogenous depression first episode           | affective disorders | 294877011        | Mixed bipolar affective disorder, NOS                        | affective disorders |
| 346972018         | Endogenous depression first episode           | affective disorders | 294876019        | Mixed bipolar affective disorder, in full remission          | affective disorders |
| 251629019         | H/O: depression                               | affective disorders | 8235161000006110 | Mixed bipolar affective disorder, in partial remission       | affective disorders |
| 1780205015        | H/O: manic depressive disorder                | affective disorders | 294871012        | Mixed bipolar affective disorder, mild                       | affective disorders |
| 4539961000006115  | Has had depression                            | affective disorders | 294872017        | Mixed bipolar affective disorder, moderate                   | affective disorders |
| 4539971000006110  | History of depression                         | affective disorders | 701051000006118  | Mixed bipolar affective disorder, partial/unspec remission   | affective disorders |
| 789221000006116   | Hypomanic psychoses                           | affective disorders | 294874016        | Mixed bipolar affective disorder,                            | affective disorders |
| 411890010         | Lithium monitoring                            | affective disorders |                  |                                                              |                     |
| 369972011         | Loss of capacity for enjoyment                | affective disorders |                  |                                                              |                     |
| 369974012         | Loss of hope for the future                   | affective disorders |                  |                                                              |                     |
| 2164009011        | Low mood                                      | affective disorders |                  |                                                              |                     |
| 3094941000006114  | Major depression, single episode              | affective disorders |                  |                                                              |                     |

|                  |                                                                     |                     |                  |                                                                                     |                     |
|------------------|---------------------------------------------------------------------|---------------------|------------------|-------------------------------------------------------------------------------------|---------------------|
|                  | severe, with psychosis                                              |                     | 1488771018       | Postnatal depression counselling                                                    | affective disorders |
| 701071000006111  | Mixed bipolar affective disorder, severe, without psychosis         | affective disorders | 3837121000006116 | Postoperative depression                                                            | affective disorders |
| 294870013        | Mixed bipolar affective disorder, unspecified                       | affective disorders | 295536013        | Postviral depression                                                                | affective disorders |
| 6000711000006112 | Moderate depression                                                 | affective disorders | 294642013        | Presenile dementia with depression                                                  | affective disorders |
| 882821000006110  | Moderate depression                                                 | affective disorders | 202561000006114  | Prolonged depressive reaction                                                       | affective disorders |
| 2748031000006110 | Moderate major depression, single episode                           | affective disorders | 3700911000006115 | Psychotic depression                                                                | affective disorders |
| 981181000006117  | Mood swings                                                         | affective disorders | 1231868010       | Puerperal depression                                                                | affective disorders |
| 31960011         | Mood swings                                                         | affective disorders | 882401000006115  | Reactive (neurotic) depression                                                      | affective disorders |
| 675861000006113  | Neurotic depression reactive type                                   | affective disorders | 294917018        | Reactive depressive psychosis                                                       | affective disorders |
| 253619019        | O/E - depressed                                                     | affective disorders | 294899015        | Rebound mood swings                                                                 | affective disorders |
| 253624016        | O/E - elated                                                        | affective disorders | 294844012        | Recurrent depression                                                                | affective disorders |
| 2474715017       | On depression register                                              | affective disorders | 3247081000006110 | Recurrent major depression in complete remission                                    | affective disorders |
| 1680571000006118 | On full dose long term treatment depression - enh serv admin        | affective disorders | 3247071000006112 | Recurrent major depression in full remission                                        | affective disorders |
| 681801000000113  | On full dose long term treatment for depression                     | affective disorders | 182721000006111  | Recurrent major depressive episode                                                  | affective disorders |
| 401522012        | On lithium                                                          | affective disorders | 294845013        | Recurrent major depressive episode NOS                                              | affective disorders |
| 1972101000006111 | Organic bipolar affective disorder                                  | affective disorders | 294843018        | Recurrent major depressive episodes, in full remission                              | affective disorders |
| 294891017        | Other and unspecified manic-depressive psychoses                    | affective disorders | 8237831000006115 | Recurrent major depressive episodes, in partial remission                           | affective disorders |
| 294896010        | Other and unspecified manic-depressive psychoses NOS                | affective disorders | 294837015        | Recurrent major depressive episodes, mild                                           | affective disorders |
| 294895014        | Other mixed manic-depressive psychoses                              | affective disorders | 294838013        | Recurrent major depressive episodes, moderate                                       | affective disorders |
| 1839561000006119 | PHQ9 total score 10-14 (moderate depression)                        | affective disorders | 182771000006112  | Recurrent major depressive episodes, severe, no psychosis                           | affective disorders |
| 1839581000006112 | PHQ9 total score 20-27 (severe depression)                          | affective disorders | 294840015        | Recurrent major depressive episodes, severe, with psychosis                         | affective disorders |
| 1839551000006116 | PHQ9 total score 5-9 (mild depression)                              | affective disorders | 8232591000006117 | Recurrent major depressive episodes, severe, with psychosis, psychosis in remission | affective disorders |
| 2533375017       | Patient given advice about management of depression                 | affective disorders | 1755911000006110 | Recurrent major depressive episodes, severe, with psychosis, psychosis in remission | affective disorders |
| 8035351000006117 | Positive screening for depression on Patient Health Questionnaire 9 | affective disorders | 294836012        | Recurrent major depressive episodes, unspecified                                    | affective disorders |
| 853871000006111  | Post natal depression                                               | affective disorders | 182801000006114  | Recurrent major depressive                                                          | affective disorders |
| 223651000000118  | Postnatal depression                                                | affective disorders |                  |                                                                                     |                     |
| 6550781000006113 | Postnatal depression counseling                                     | affective disorders |                  |                                                                                     |                     |

|                  |                                                                                     |                     |                   |                                                                                 |                     |
|------------------|-------------------------------------------------------------------------------------|---------------------|-------------------|---------------------------------------------------------------------------------|---------------------|
|                  | episodes,partial/unspec remission                                                   |                     | 12451451000006110 | Single major depressive episode, in full remission                              | affective disorders |
| 294818012        | Recurrent manic episode NOS                                                         | affective disorders | 294825017         | Single major depressive episode, mild                                           | affective disorders |
| 294810017        | Recurrent manic episodes                                                            | affective disorders | 294826016         | Single major depressive episode, moderate                                       | affective disorders |
| 294817019        | Recurrent manic episodes, in full remission                                         | affective disorders | 12451461000006112 | Single major depressive episode, moderate                                       | affective disorders |
| 294812013        | Recurrent manic episodes, mild                                                      | affective disorders | 142521000006110   | Single major depressive episode, partial or unspec remission                    | affective disorders |
| 294813015        | Recurrent manic episodes, moderate                                                  | affective disorders | 294828015         | Single major depressive episode, severe, with psychosis                         | affective disorders |
| 182861000006110  | Recurrent manic episodes, partial or unspecified remission                          | affective disorders | 1755901000006112  | Single major depressive episode, severe, with psychosis, psychosis in remission | affective disorders |
| 182871000006115  | Recurrent manic episodes, severe without mention psychosis                          | affective disorders | 8232571000006118  | Single major depressive episode, severe, with psychosis, psychosis in remission | affective disorders |
| 294815010        | Recurrent manic episodes, severe, with psychosis                                    | affective disorders | 142541000006115   | Single major depressive episode, severe, without psychosis                      | affective disorders |
| 294811018        | Recurrent manic episodes, unspecified                                               | affective disorders | 294824018         | Single major depressive episode, unspecified                                    | affective disorders |
| 300711000000119  | Referral for guided self-help for depression                                        | affective disorders | 294808019         | Single manic episode in full remission                                          | affective disorders |
| 2474716016       | Removed from depression register                                                    | affective disorders | 294807012         | Single manic episode in partial or unspecified remission                        | affective disorders |
| 369982012        | Seasonal affective disorder                                                         | affective disorders | 294803011         | Single manic episode, mild                                                      | affective disorders |
| 294646011        | Senile dementia with depression                                                     | affective disorders | 294804017         | Single manic episode, moderate                                                  | affective disorders |
| 3497641000006117 | Severe bipolar I disorder, most recent episode depressed without psychotic features | affective disorders | 294805016         | Single manic episode, severe without mention of psychosis                       | affective disorders |
| 2501011000006119 | Severe bipolar I disorder, most recent episode manic, without psychotic features    | affective disorders | 294806015         | Single manic episode, severe, with psychosis                                    | affective disorders |
| 6000721000006116 | Severe depression                                                                   | affective disorders | 294802018         | Single manic episode, unspecified                                               | affective disorders |
| 882831000006113  | Severe depression                                                                   | affective disorders | 401523019         | Started lithium                                                                 | affective disorders |
| 7965131000006117 | Severe major depression, single episode                                             | affective disorders | 1650771000000113  | Suspected depression                                                            | affective disorders |
| 2957311000006113 | Severe recurrent major depression with psychotic features                           | affective disorders | 1488626018        | Symptoms of depression                                                          | affective disorders |
| 3087971000006112 | Severe recurrent major depression without psychotic features                        | affective disorders | 82091000006116    | Unspecified bipolar affect disord, partial/unspec remission                     | affective disorders |
| 2809811000006111 | Single episode of major depression in full remission                                | affective disorders | 294880012         | Unspecified bipolar affective disorder                                          | affective disorders |
| 401766011        | Single major depressive episode                                                     | affective disorders | 294888017         | Unspecified bipolar affective disorder, NOS                                     | affective disorders |
| 294832014        | Single major depressive episode NOS                                                 | affective disorders |                   |                                                                                 |                     |
| 294831019        | Single major depressive episode, in full remission                                  | affective disorders |                   |                                                                                 |                     |

|                   |                                                               |                     |                  |                                                             |                     |
|-------------------|---------------------------------------------------------------|---------------------|------------------|-------------------------------------------------------------|---------------------|
| 294887010         | Unspecified bipolar affective disorder, in full remission     | affective disorders | 1785851000006110 | [X]Bipolar affective disorder type I                        | affective disorders |
| 294882016         | Unspecified bipolar affective disorder, mild                  | affective disorders | 1785861000006112 | [X]Bipolar affective disorder type II                       | affective disorders |
| 294883014         | Unspecified bipolar affective disorder, moderate              | affective disorders | 367111000006110  | [X]Bipolar affective disorder, current episode hypomanic    | affective disorders |
| 82151000006114    | Unspecified bipolar affective disorder, severe, no psychosis  | affective disorders | 367121000006119  | [X]Bipolar affective disorder, current episode mixed        | affective disorders |
| 294881011         | Unspecified bipolar affective disorder, unspecified           | affective disorders | 296130018        | [X]Bipolar affective disorder, currently in remission       | affective disorders |
| 82171000006116    | Unspecified bipolar affective disorder, severe with psychosis | affective disorders | 296135011        | [X]Bipolar affective disorder, unspecified                  | affective disorders |
| 294892012         | Unspecified manic-depressive psychoses                        | affective disorders | 367151000006111  | [X]Bipolar disorder, single manic episode                   | affective disorders |
| 12718441000006115 | Unspecified puerperal psychosis                               | affective disorders | 376291000006118  | [X]Cyclothymia                                              | affective disorders |
| 294714016         | Unspecified puerperal psychosis                               | affective disorders | 376691000006116  | [X]Depression NOS                                           | affective disorders |
| 1222477019        | [D]Postoperative depression                                   | affective disorders | 376701000006116  | [X]Depressive conduct disorder                              | affective disorders |
| 909681000006110   | [RFC] Depression                                              | affective disorders | 376711000006118  | [X]Depressive disorder NOS                                  | affective disorders |
| 908731000006114   | [RFC] Postnatal depression                                    | affective disorders | 376721000006114  | [X]Depressive episode                                       | affective disorders |
| 345141000006111   | [V]Personal history of manic-depressive psychosis             | affective disorders | 401872015        | [X]Depressive episode, unspecified                          | affective disorders |
| 1227584015        | [V]Personal history of manic-depressive psychosis             | affective disorders | 379431000006113  | [X]Dysthymia                                                | affective disorders |
| 359121000006116   | [X] Reactive depression NOS                                   | affective disorders | 379771000006116  | [X]Endogenous depression with psychotic symptoms            | affective disorders |
| 362781000006116   | [X]Affective psychosis NOS                                    | affective disorders | 379781000006118  | [X]Endogenous depression without psychotic symptoms         | affective disorders |
| 1785881000006119  | [X]Antenatal depression                                       | affective disorders | 389401000006111  | [X]Hypomania                                                | affective disorders |
| 366561000006119   | [X]Atypical depression                                        | affective disorders | 1715771000006112 | [X]Major depression, mild                                   | affective disorders |
| 367051000006112   | [X]Bipol aff disord, curr epis sev depress, no psychot symp   | affective disorders | 1715181000006114 | [X]Major depression, moderately severe                      | affective disorders |
| 367161000006113   | [X]Bipolar II disorder                                        | affective disorders | 396081000006116  | [X]Major depression, recurrent without psychotic symptoms   | affective disorders |
| 1785871000006117  | [X]Bipolar II disorder                                        | affective disorders | 1715191000006112 | [X]Major depression, severe with psychotic symptoms         | affective disorders |
| 367061000006114   | [X]Bipolar affect dis cur epi severe depress with psyc symp   | affective disorders | 1715781000006110 | [X]Major depression, severe without psychotic symptoms      | affective disorders |
| 367071000006119   | [X]Bipolar affect disorder cur epi manic with psychotic symp  | affective disorders | 396691000006111  | [X]Mania NOS                                                | affective disorders |
| 367081000006116   | [X]Bipolar affect disorder cur epi manic wout psychotic symp  | affective disorders | 396701000006111  | [X]Mania with mood-congruent psychotic symptoms             | affective disorders |
| 367091000006118   | [X]Bipolar affect disorder cur epi mild or moderate depressn  | affective disorders | 396711000006114  | [X]Mania with mood-incongruent psychotic symptoms           | affective disorders |
| 367101000006112   | [X]Bipolar affective disorder                                 | affective disorders | 401863011        | [X]Mania with psychotic symptoms                            | affective disorders |
|                   |                                                               |                     | 296110017        | [X]Mania without psychotic symptoms                         | affective disorders |
|                   |                                                               |                     | 396741000006113  | [X]Manic episode                                            | affective disorders |
|                   |                                                               |                     | 401864017        | [X]Manic episode, unspecified                               | affective disorders |
|                   |                                                               |                     | 396771000006117  | [X]Manic-depress psychosis, depressd, no psychotic symptoms | affective disorders |

|                   |                                                              |                     |                   |                                                              |                     |
|-------------------|--------------------------------------------------------------|---------------------|-------------------|--------------------------------------------------------------|---------------------|
| 396781000006119   | [X]Manic-depress psychosis,depressed type+psychotic symptoms | affective disorders | 296443010         | [X]Puerperal mental disorder, unspecified                    | affective disorders |
| 396791000006116   | [X]Manic-depressive illness                                  | affective disorders | 424531000006118   | [X]Recurr depress disorder cur epi severe without psych symp | affective disorders |
| 396801000006115   | [X]Manic-depressive psychosis                                | affective disorders | 424541000006111   | [X]Recurr severe episodes/major depression+psychotic symptom | affective disorders |
| 396071000006119   | [X]Manic-depressive reaction                                 | affective disorders | 424551000006113   | [X]Recurr severe episodes/psychogenic depressive psychosis   | affective disorders |
| 398101000006113   | [X]Mental and behav disorders assoc with the puerperium NEC  | affective disorders | 424561000006110   | [X]Recurrent brief depressive episodes                       | affective disorders |
| 398281000006112   | [X]Mental/behav disoth stims inc caffeine: psychotic dis     | affective disorders | 424571000006115   | [X]Recurrent depress disorder cur epi severe with psych symp | affective disorders |
| 213641000000111   | [X]Mild depression                                           | affective disorders | 401873013         | [X]Recurrent depressive disorder                             | affective disorders |
| 11918531000006118 | [X]Mild depressive episode                                   | affective disorders | 296180012         | [X]Recurrent depressive disorder, current episode mild       | affective disorders |
| 296137015         | [X]Mild depressive episode                                   | affective disorders | 296181011         | [X]Recurrent depressive disorder, current episode moderate   | affective disorders |
| 398421000006112   | [X]Mild mental/behav disorder assoc with the puerperium NEC  | affective disorders | 296198011         | [X]Recurrent depressive disorder, currently in remission     | affective disorders |
| 398541000006116   | [X]Mixed affective episode                                   | affective disorders | 401876017         | [X]Recurrent depressive disorder, unspecified                | affective disorders |
| 11918561000006110 | [X]Moderate depressive episode                               | affective disorders | 424631000006119   | [X]Recurrent episodes of depressive reaction                 | affective disorders |
| 296138013         | [X]Moderate depressive episode                               | affective disorders | 424641000006112   | [X]Recurrent episodes of psychogenic depression              | affective disorders |
| 398841000006119   | [X]Monopolar depression NOS                                  | affective disorders | 424651000006114   | [X]Recurrent episodes of reactive depression                 | affective disorders |
| 398851000006117   | [X]Mood - affective disorders                                | affective disorders | 424661000006111   | [X]Recurrent manic episodes                                  | affective disorders |
| 399961000006118   | [X]Neurotic depression                                       | affective disorders | 424671000006116   | [X]Recurrent severe episodes of psychotic depression         | affective disorders |
| 401865016         | [X]Other bipolar affective disorders                         | affective disorders | 424681000006118   | [X]Recurrent severe episodes/reactive depressive psychosis   | affective disorders |
| 401871010         | [X]Other depressive episodes                                 | affective disorders | 11921141000006115 | [X]Recurrent severe episodes/reactive depressive psychosis   | affective disorders |
| 296118012         | [X]Other manic episodes                                      | affective disorders | 425411000006110   | [X]SAD - Seasonal affective disorder                         | affective disorders |
| 296209016         | [X]Other mood affective disorders                            | affective disorders | 425751000006115   | [X]Seasonal depressive disorder                              | affective disorders |
| 296207019         | [X]Other persistent mood affective disorders                 | affective disorders | 401869010         | [X]Severe depressive episode with psychotic symptoms         | affective disorders |
| 296199015         | [X]Other recurrent depressive disorders                      | affective disorders | 401866015         | [X]Severe depressive episode without psychotic symptoms      | affective disorders |
| 401878016         | [X]Other recurrent mood affective disorders                  | affective disorders | 11921301000006119 | [X]Severe depressive episode                                 | affective disorders |
| 401877014         | [X]Other single mood affective disorders                     | affective disorders |                   |                                                              |                     |
| 296218019         | [X]Other specified mood affective disorders                  | affective disorders |                   |                                                              |                     |
| 296208012         | [X]Persistent mood affective disorder, unspecified           | affective disorders |                   |                                                              |                     |
| 296204014         | [X]Persistent mood affective disorders                       | affective disorders |                   |                                                              |                     |
| 423131000006113   | [X]Postnatal depression NOS                                  | affective disorders |                   |                                                              |                     |
| 423141000006115   | [X]Postpartum depression NOS                                 | affective disorders |                   |                                                              |                     |
| 423611000006111   | [X]Prolonged single episode of reactive depression           | affective disorders |                   |                                                              |                     |

|                  |                                                              |                     |                   |                                                             |                  |
|------------------|--------------------------------------------------------------|---------------------|-------------------|-------------------------------------------------------------|------------------|
|                  | without psychotic symptoms                                   |                     | 478089014         | Adjustment reaction                                         | anxiety&neurosis |
| 426581000006113  | [X]Severe mental and behav disorder assoc wth puerperium NEC | affective disorders | 295519017         | Adjustment reaction NOS                                     | anxiety&neurosis |
| 426891000006114  | [X]Single episode agitated depressn w/out psychotic symptoms | affective disorders | 461701000006114   | Adjustment reaction due to hospitalisation                  | anxiety&neurosis |
| 223741000000112  | [X]Single episode major depression w/out psychotic symptoms  | affective disorders | 295505017         | Adjustment reaction with aggression                         | anxiety&neurosis |
| 426911000006111  | [X]Single episode of depressive reaction                     | affective disorders | 295507013         | Adjustment reaction with antisocial behaviour               | anxiety&neurosis |
| 426921000006115  | [X]Single episode of major depression and psychotic symptoms | affective disorders | 1230451012        | Adjustment reaction with anxious mood                       | anxiety&neurosis |
| 426931000006117  | [X]Single episode of masked depression NOS                   | affective disorders | 295508015         | Adjustment reaction with destructiveness                    | anxiety&neurosis |
| 426941000006110  | [X]Single episode of psychogenic depression                  | affective disorders | 461761000006110   | Adjustment reaction with disturbance emotion and conduct    | anxiety&neurosis |
| 426951000006112  | [X]Single episode of psychogenic depressive psychosis        | affective disorders | 295504018         | Adjustment reaction with disturbance of other emotion NOS   | anxiety&neurosis |
| 426961000006114  | [X]Single episode of psychotic depression                    | affective disorders | 497343017         | Adjustment reaction with mixed disturbance of emotion       | anxiety&neurosis |
| 426971000006119  | [X]Single episode of reactive depression                     | affective disorders | 295513016         | Adjustment reaction with physical symptoms                  | anxiety&neurosis |
| 426981000006116  | [X]Single episode of reactive depressive psychosis           | affective disorders | 506324018         | Adjustment reaction with predominant disturbance of conduct | anxiety&neurosis |
| 426991000006118  | [X]Single episode vital depression w/out psychotic symptoms  | affective disorders | 461821000006111   | Adjustment reaction, predominant disturbance other emotions | anxiety&neurosis |
| 401879012        | [X]Unspecified mood affective disorder                       | affective disorders | 295498014         | Adolescent emancipation disorder                            | anxiety&neurosis |
| 432511000006119  | [X]Vital depression, recurrent without psychotic symptoms    | affective disorders | 882381000006115   | Agoraphobia                                                 | anxiety&neurosis |
| 972931000006117  | ** The treatment of anxiety disorders                        | anxiety&neurosis    | 988881000006118   | Agoraphobia                                                 | anxiety&neurosis |
| 4981541000006112 | AMT - Anxiety management training                            | anxiety&neurosis    | 294992011         | Agoraphobia with panic attacks                              | anxiety&neurosis |
| 97986013         | Acrophobia                                                   | anxiety&neurosis    | 294993018         | Agoraphobia without mention of panic attacks                | anxiety&neurosis |
| 295475018        | Acute fugue state due to acute stress reaction               | anxiety&neurosis    | 12716981000006115 | Agoraphobia without mention of panic attacks                | anxiety&neurosis |
| 295474019        | Acute panic state due to acute stress reaction               | anxiety&neurosis    | 484680014         | Air swallowing - excessive                                  | anxiety&neurosis |
| 459711000006119  | Acute posttrauma stress state                                | anxiety&neurosis    | 3870011000006111  | Amnesia neurosis                                            | anxiety&neurosis |
| 500650019        | Acute reaction to stress                                     | anxiety&neurosis    | 295011010         | Anancastic neurosis                                         | anxiety&neurosis |
| 295478016        | Acute situational disturbance                                | anxiety&neurosis    | 4764861000006119  | Anankastic neurosis                                         | anxiety&neurosis |
| 401810015        | Acute stress reaction NOS                                    | anxiety&neurosis    | 1231321013        | Animal phobia                                               | anxiety&neurosis |
| 295476017        | Acute stupor state due to acute stress reaction              | anxiety&neurosis    | 283464017         | Antiphobic therapy                                          | anxiety&neurosis |
| 3265831000006118 | Adjustment disorder with anxiety                             | anxiety&neurosis    | 3287741000006111  | Anxiety                                                     | anxiety&neurosis |
|                  |                                                              |                     | 2287071000000115  | Anxiety about breathlessness                                | anxiety&neurosis |
|                  |                                                              |                     | 6025531000006111  | Anxiety counseling                                          | anxiety&neurosis |
|                  |                                                              |                     | 6025521000006113  | Anxiety counselling                                         | anxiety&neurosis |



|                  |                                   |                  |                  |                                               |                  |
|------------------|-----------------------------------|------------------|------------------|-----------------------------------------------|------------------|
| 5024071000006118 | Anxiety depression                | anxiety&neurosis | 8297491000006114 | Education about anxiety                       | anxiety&neurosis |
| 342665019        | Anxiety management training       | anxiety&neurosis | 295514010        | Elective mutism due to an adjustment reaction | anxiety&neurosis |
| 3287771000006115 | Anxiety reaction                  | anxiety&neurosis | 6358151000006115 | Episodic paroxysmal anxiety disorder          | anxiety&neurosis |
| 2618241000000117 | Anxiety resolved                  | anxiety&neurosis | 346985015        | Examination fear                              | anxiety&neurosis |
| 304838011        | Anxiety state                     | anxiety&neurosis | 294998010        | Fear of crowds                                | anxiety&neurosis |
| 294963012        | Anxiety state NOS                 | anxiety&neurosis | 166341019        | Fear of death                                 | anxiety&neurosis |
| 294953016        | Anxiety state unspecified         | anxiety&neurosis | 370048011        | Fear of flying                                | anxiety&neurosis |
| 488201000006114  | Anxiety states                    | anxiety&neurosis | 295004011        | Fear of pregnancy                             | anxiety&neurosis |
| 488211000006112  | Anxiety with depression           | anxiety&neurosis | 760791000006116  | Fit - hysterical                              | anxiety&neurosis |
| 489141000006110  | Aphonia - hysterical              | anxiety&neurosis | 370049015        | Flying phobia                                 | anxiety&neurosis |
| 496061000006116  | Astasia - abasia, hysterical      | anxiety&neurosis | 2848311000006117 | GAD - Generalised anxiety disorder            | anxiety&neurosis |
| 223621000000111  | Ataxia - hysterical               | anxiety&neurosis | 2848301000006115 | GAD - Generalized anxiety disorder            | anxiety&neurosis |
| 502727013        | Bereavement reaction              | anxiety&neurosis | 798571000006111  | Ganser's syndrome - hysterical                | anxiety&neurosis |
| 1861181000006114 | Breathlessness causing anxiety    | anxiety&neurosis | 481154010        | Generalised anxiety disorder                  | anxiety&neurosis |
| 1785963019       | Briquet's disorder                | anxiety&neurosis | 566931000000114  | Generalised anxiety disorder 7 item score     | anxiety&neurosis |
| 295393016        | Bruxism (teeth grinding)          | anxiety&neurosis | 2848291000006116 | Generalized anxiety disorder                  | anxiety&neurosis |
| 1488717011       | C/O - panic attack                | anxiety&neurosis | 346997019        | Globus abdominalis                            | anxiety&neurosis |
| 485870016        | Cancer phobia                     | anxiety&neurosis | 73437013         | Globus hystericus                             | anxiety&neurosis |
| 2162219012       | Cardiac neurosis                  | anxiety&neurosis | 123751014        | Grief reaction                                | anxiety&neurosis |
| 294960010        | Chronic anxiety                   | anxiety&neurosis | 2533632018       | H/O: agoraphobia                              | anxiety&neurosis |
| 33475016         | Claustrophobia                    | anxiety&neurosis | 251630012        | H/O: anxiety state                            | anxiety&neurosis |
| 101627011        | Combat fatigue                    | anxiety&neurosis | 6857231000006117 | History of agoraphobia                        | anxiety&neurosis |
| 56251019         | Compensation neurosis             | anxiety&neurosis | 4539991000006111 | History of anxiety state                      | anxiety&neurosis |
| 6550101000006115 | Complaining of panic attack       | anxiety&neurosis | 30729012         | Hypochondriasis                               | anxiety&neurosis |
| 295015018        | Compulsive neurosis               | anxiety&neurosis | 493878012        | Hysteria                                      | anxiety&neurosis |
| 295511019        | Concentration camp syndrome       | anxiety&neurosis | 401779019        | Hysteria NOS                                  | anxiety&neurosis |
| 6025541000006118 | Counseling for anxiety            | anxiety&neurosis | 294964018        | Hysteria unspecified                          | anxiety&neurosis |
| 6025551000006116 | Counselling for anxiety           | anxiety&neurosis | 787521000006112  | Hysterical amnesia                            | anxiety&neurosis |
| 295503012        | Culture shock                     | anxiety&neurosis | 147404016        | Hysterical blindness                          | anxiety&neurosis |
| 65032014         | Dental phobia                     | anxiety&neurosis | 117876016        | Hysterical deafness                           | anxiety&neurosis |
| 3651081000006115 | Depersonalisation neurosis        | anxiety&neurosis | 3214951000006118 | Hysterical disorder                           | anxiety&neurosis |
| 1216885017       | Depersonalisation syndrome        | anxiety&neurosis | 4764661000006115 | Hysterical fit                                | anxiety&neurosis |
| 3651071000006118 | Depersonalization neurosis        | anxiety&neurosis | 7046013          | Hysterical fugue                              | anxiety&neurosis |
| 294978017        | Dissociative reaction unspecified | anxiety&neurosis | 3214941000006115 | Hysterical neurosis, conversion type          | anxiety&neurosis |
| 295499018        | Early adult emancipation disorder | anxiety&neurosis | 3214931000006113 | Hysterical neurosis, dissociative type        | anxiety&neurosis |

|                  |                                           |                  |                   |                                                       |                  |
|------------------|-------------------------------------------|------------------|-------------------|-------------------------------------------------------|------------------|
| 147537017        | Hysterical paralysis                      | anxiety&neurosis | 295483012         | Other acute stress reaction NOS                       | anxiety&neurosis |
| 882431000006111  | Hysterical personality                    | anxiety&neurosis | 295477014         | Other acute stress reactions                          | anxiety&neurosis |
| 3398571000006119 | Hysterical personality disorder           | anxiety&neurosis | 295517015         | Other adjustment reaction with withdrawal             | anxiety&neurosis |
| 294968015        | Hysterical seizures                       | anxiety&neurosis | 295510018         | Other adjustment reactions                            | anxiety&neurosis |
| 294965017        | Hysterical tremor                         | anxiety&neurosis | 295518013         | Other adjustment reactions NOS                        | anxiety&neurosis |
| 3099611000006115 | Hysterical vomiting                       | anxiety&neurosis | 401778010         | Other conversion disorder                             | anxiety&neurosis |
| 3385931000006117 | Isolated phobia                           | anxiety&neurosis | 295033012         | Other neurotic disorder NOS                           | anxiety&neurosis |
| 7663271000006111 | Management of anxiety                     | anxiety&neurosis | 295026012         | Other neurotic disorders                              | anxiety&neurosis |
| 1976491000006113 | Mixed anxiety and depressive reaction     | anxiety&neurosis | 295031014         | Other occupational neurosis                           | anxiety&neurosis |
| 1777688018       | Muscular headache                         | anxiety&neurosis | 882391000006117   | Other phobias                                         | anxiety&neurosis |
| 130538010        | Nervous breakdown                         | anxiety&neurosis | 295512014         | Other post-traumatic stress disorder                  | anxiety&neurosis |
| 677031000006115  | Nervous exhaustion                        | anxiety&neurosis | 12730101000006118 | Other post-traumatic stress disorder                  | anxiety&neurosis |
| 677321000006115  | Neurasthenia - nervous debility           | anxiety&neurosis | 295392014         | Other psychogenic malfunction                         | anxiety&neurosis |
| 295360013        | Neurocirculatory asthenia                 | anxiety&neurosis | 295394010         | Other psychogenic malfunction NOS                     | anxiety&neurosis |
| 675731000006112  | Neuroses or other mental disorder NOS     | anxiety&neurosis | 9331000006113     | Other specified neuroses or other mental disorders    | anxiety&neurosis |
| 401783019        | Neurotic disorder NOS                     | anxiety&neurosis | 3268081000006115  | PTSD - Post-traumatic stress disorder                 | anxiety&neurosis |
| 675881000006115  | Neurotic disorders                        | anxiety&neurosis | 339044013         | Panic attack                                          | anxiety&neurosis |
| 2549895012       | O/E - panic attack                        | anxiety&neurosis | 1210253015        | Panic disorder                                        | anxiety&neurosis |
| 4764871000006114 | OCD - Obsessive-compulsive disorder       | anxiety&neurosis | 1808521000006110  | Panic disorder without agoraphobia                    | anxiety&neurosis |
| 853201000006116  | Obsessional compulsive psychosis          | anxiety&neurosis | 2335571000000115  | Patient given advice about management of anxiety      | anxiety&neurosis |
| 295016017        | Obsessional neurosis                      | anxiety&neurosis | 2648186013        | Phantom pregnancy                                     | anxiety&neurosis |
| 7488401000006113 | Obsessional personality disorder          | anxiety&neurosis | 3649691000006114  | Phobia of going out                                   | anxiety&neurosis |
| 3600941000006114 | Obsessional ruminations                   | anxiety&neurosis | 294991016         | Phobia unspecified                                    | anxiety&neurosis |
| 500817017        | Obsessional thoughts                      | anxiety&neurosis | 223641000000116   | Phobic anxiety                                        | anxiety&neurosis |
| 2698661000006113 | Obsessive compulsive behavior             | anxiety&neurosis | 853241000006119   | Phobic anxiety                                        | anxiety&neurosis |
| 2698651000006111 | Obsessive compulsive behaviour            | anxiety&neurosis | 12731491000006112 | Phobic disorder NOS                                   | anxiety&neurosis |
| 4764881000006112 | Obsessive compulsive disorder             | anxiety&neurosis | 401780016         | Phobic disorder NOS                                   | anxiety&neurosis |
| 4764891000006110 | Obsessive compulsive neurosis             | anxiety&neurosis | 223631000000113   | Phobic disorders                                      | anxiety&neurosis |
| 2520371000006111 | Obsessive compulsive personality disorder | anxiety&neurosis | 882371000006118   | Phobic state                                          | anxiety&neurosis |
| 295017014        | Obsessive-compulsive disorder NOS         | anxiety&neurosis | 103848017         | Photophobia                                           | anxiety&neurosis |
| 269821000006113  | Obsessive-compulsive disorders            | anxiety&neurosis | 232501000006118   | Physiological malfunction arising from mental factors | anxiety&neurosis |
| 6910391000006112 | On examination - panic attack             | anxiety&neurosis | 3268091000006117  | Post-traumatic stress syndrome                        | anxiety&neurosis |
| 2777721000006112 | Organic anxiety disorder                  | anxiety&neurosis | 199101000006113   | Psychalgia                                            | anxiety&neurosis |
|                  |                                           |                  | 295465016         | Psychalgia NOS                                        | anxiety&neurosis |

|                  |                                                |                  |                  |                                                              |                  |
|------------------|------------------------------------------------|------------------|------------------|--------------------------------------------------------------|------------------|
| 295032019        | Psychasthenic neurosis                         | anxiety&neurosis | 108724018        | Psychogenic torticollis                                      | anxiety&neurosis |
| 1806261000006117 | Psycho-education - anxiety                     | anxiety&neurosis | 199671000006111  | Psychogenic vaginismus                                       | anxiety&neurosis |
| 484681013        | Psychogenic aerophagy                          | anxiety&neurosis | 295355014        | Psychogenic yawning                                          | anxiety&neurosis |
| 295348012        | Psychogenic air hunger                         | anxiety&neurosis | 295395011        | Psychosomatic disorder NOS                                   | anxiety&neurosis |
| 158091017        | Psychogenic aphonia                            | anxiety&neurosis | 294961014        | Recurrent anxiety                                            | anxiety&neurosis |
| 295464017        | Psychogenic backache                           | anxiety&neurosis | 1808511000006119 | Recurrent panic attacks                                      | anxiety&neurosis |
| 199321000006118  | Psychogenic cardiovascular disorder            | anxiety&neurosis | 300681000000118  | Referral for guided self-help for anxiety                    | anxiety&neurosis |
| 295362017        | Psychogenic cardiovascular symptom NOS         | anxiety&neurosis | 2391581000000111 | Referral for guided self-help for anxiety declined           | anxiety&neurosis |
| 199341000006113  | Psychogenic cardiovascular symptoms            | anxiety&neurosis | 2618361000000113 | Referral for psychological management of anxiety             | anxiety&neurosis |
| 295382018        | Psychogenic constipation                       | anxiety&neurosis | 2618401000000116 | Referral for psychological management of anxiety declined    | anxiety&neurosis |
| 295349016        | Psychogenic cough                              | anxiety&neurosis | 851351000006112  | School phobia                                                | anxiety&neurosis |
| 401804015        | Psychogenic diarrhoea                          | anxiety&neurosis | 441512015        | Separation anxiety disorder                                  | anxiety&neurosis |
| 295387012        | Psychogenic dysmenorrhea                       | anxiety&neurosis | 90724016         | Simple phobia                                                | anxiety&neurosis |
| 295381013        | Psychogenic dyspepsia                          | anxiety&neurosis | 2907991000006110 | Social anxiety disorder                                      | anxiety&neurosis |
| 295388019        | Psychogenic dysuria                            | anxiety&neurosis | 294994012        | Social phobia, fear of eating in public                      | anxiety&neurosis |
| 295383011        | Psychogenic gastrointestinal tract symptom NOS | anxiety&neurosis | 294995013        | Social phobia, fear of public speaking                       | anxiety&neurosis |
| 199441000006117  | Psychogenic gastrointestinal tract symptoms    | anxiety&neurosis | 294996014        | Social phobia, fear of public washing                        | anxiety&neurosis |
| 295389010        | Psychogenic genitourinary tract symptom NOS    | anxiety&neurosis | 138401000006119  | Social phobic disorders                                      | anxiety&neurosis |
| 295384017        | Psychogenic genitourinary tract symptoms       | anxiety&neurosis | 1774451016       | Somatization disorder                                        | anxiety&neurosis |
| 295350016        | Psychogenic hiccough                           | anxiety&neurosis | 401811016        | Specific academic or work inhibition                         | anxiety&neurosis |
| 295351017        | Psychogenic hyperventilation                   | anxiety&neurosis | 133361000006119  | Specific academic or work inhibition                         | anxiety&neurosis |
| 295342013        | Psychogenic musculoskeletal symptoms           | anxiety&neurosis | 411460011        | Specific work inhibition                                     | anxiety&neurosis |
| 295346011        | Psychogenic musculoskeletal symptoms NOS       | anxiety&neurosis | 196858012        | Spurious diarrhoea                                           | anxiety&neurosis |
| 295460014        | Psychogenic pain unspecified                   | anxiety&neurosis | 346984016        | Stage fright                                                 | anxiety&neurosis |
| 199531000006114  | Psychogenic paralysis                          | anxiety&neurosis | 121871000006118  | Stress reaction causing mixed disturbance of emotion/conduct | anxiety&neurosis |
| 295364016        | Psychogenic pruritus                           | anxiety&neurosis | 1809331000006113 | Symptoms of agoraphobia                                      | anxiety&neurosis |
| 295357018        | Psychogenic respiratory symptom NOS            | anxiety&neurosis | 1786078018       | Tension headache                                             | anxiety&neurosis |
| 199581000006110  | Psychogenic respiratory symptoms               | anxiety&neurosis | 397879018        | Tired all the time                                           | anxiety&neurosis |
| 295363010        | Psychogenic skin symptoms                      | anxiety&neurosis | 3268071000006118 | Traumatic neurosis                                           | anxiety&neurosis |
| 295366019        | Psychogenic skin symptoms NOS                  | anxiety&neurosis | 347004010        | Weight fixation                                              | anxiety&neurosis |
| 295391019        | Psychogenic symptom of special sense organ     | anxiety&neurosis | 295029017        | Writer's cramp neurosis                                      | anxiety&neurosis |
|                  |                                                |                  | 909691000006113  | [RFC] Anxiety management                                     | anxiety&neurosis |
|                  |                                                |                  | 460275012        | [V]Personal history of neurosis                              | anxiety&neurosis |

|                  |                                                              |                  |                  |                                                    |                  |
|------------------|--------------------------------------------------------------|------------------|------------------|----------------------------------------------------|------------------|
| 362181000006117  | [X]Acrophobia                                                | anxiety&neurosis | 376741000006119  | [X]Depressive neurosis                             | anxiety&neurosis |
| 362301000006112  | [X]Acute crisis reaction                                     | anxiety&neurosis | 376991000006113  | [X]Dhat syndrome                                   | anxiety&neurosis |
| 1755921000006119 | [X]Acute post-traumatic stress disorder follow military comb | anxiety&neurosis | 296298015        | [X]Dissociative [conversion] disorder, unspecified | anxiety&neurosis |
| 362401000006115  | [X]Acute reaction to stress                                  | anxiety&neurosis | 296273016        | [X]Dissociative [conversion] disorders             | anxiety&neurosis |
| 362441000006118  | [X]Acute stress reaction                                     | anxiety&neurosis | 378101000006119  | [X]Dissociative amnesia                            | anxiety&neurosis |
| 362691000006113  | [X]Adjustment disorders                                      | anxiety&neurosis | 401883012        | [X]Dissociative anaesthesia and sensory loss       | anxiety&neurosis |
| 362871000006111  | [X]Agoraphobia                                               | anxiety&neurosis | 378121000006112  | [X]Dissociative convulsions                        | anxiety&neurosis |
| 362881000006114  | [X]Agoraphobia without history of panic disorder             | anxiety&neurosis | 378131000006110  | [X]Dissociative fugue                              | anxiety&neurosis |
| 363211000006112  | [X]Anankastic neurosis                                       | anxiety&neurosis | 378141000006117  | [X]Dissociative motor disorders                    | anxiety&neurosis |
| 363281000006117  | [X]Animal phobias                                            | anxiety&neurosis | 378151000006115  | [X]Dissociative stupor                             | anxiety&neurosis |
| 363361000006117  | [X]Anthropophobia                                            | anxiety&neurosis | 378291000006117  | [X]Dream anxiety disorder                          | anxiety&neurosis |
| 363661000006113  | [X]Anxiety NOS                                               | anxiety&neurosis | 379411000006119  | [X]Dysmorphophobia a nondelusional                 | anxiety&neurosis |
| 296249012        | [X]Anxiety disorder, unspecified                             | anxiety&neurosis | 386731000006116  | [X]Fatigue syndrome                                | anxiety&neurosis |
| 363641000006114  | [X]Anxiety hysteria                                          | anxiety&neurosis | 387831000006114  | [X]Ganser's syndrome                               | anxiety&neurosis |
| 363651000006111  | [X]Anxiety neurosis                                          | anxiety&neurosis | 1494942017       | [X]Gastric neurosis                                | anxiety&neurosis |
| 363671000006118  | [X]Anxiety reaction                                          | anxiety&neurosis | 388071000006116  | [X]Generalized anxiety disorder                    | anxiety&neurosis |
| 363681000006115  | [X]Anxiety state                                             | anxiety&neurosis | 388131000006118  | [X]Globus hystericus                               | anxiety&neurosis |
| 367931000006118  | [X]Body dysmorphic disorder                                  | anxiety&neurosis | 1742861000006114 | [X]Globus hystericus                               | anxiety&neurosis |
| 368021000006119  | [X]Briquet's disorder                                        | anxiety&neurosis | 345691000000118  | [X]Globus pharyngeus                               | anxiety&neurosis |
| 215901000000115  | [X]Briquet's syndrome                                        | anxiety&neurosis | 388271000006110  | [X]Grief reaction                                  | anxiety&neurosis |
| 2162217014       | [X]Cardiac neurosis                                          | anxiety&neurosis | 389151000006118  | [X]Hospitalism in children                         | anxiety&neurosis |
| 370861000006110  | [X]Childhood overanxious disorder                            | anxiety&neurosis | 389371000006113  | [X]Hypochondriacal disorder                        | anxiety&neurosis |
| 1755931000006116 | [X]Chron post-traumatic stress disorder follow military comb | anxiety&neurosis | 389381000006111  | [X]Hypochondriacal neurosis                        | anxiety&neurosis |
| 371071000006117  | [X]Claustrophobia                                            | anxiety&neurosis | 389391000006114  | [X]Hypochondriasis                                 | anxiety&neurosis |
| 371231000006113  | [X]Combat fatigue                                            | anxiety&neurosis | 389431000006115  | [X]Hysteria                                        | anxiety&neurosis |
| 375721000006119  | [X]Conversion hysteria                                       | anxiety&neurosis | 398351000006110  | [X]Mild anxiety depression                         | anxiety&neurosis |
| 375731000006116  | [X]Conversion reaction                                       | anxiety&neurosis | 398561000006117  | [X]Mixed anxiety and depressive disorder           | anxiety&neurosis |
| 375971000006116  | [X]Crisis state                                              | anxiety&neurosis | 296289018        | [X]Mixed dissociative [conversion] disorders       | anxiety&neurosis |
| 376221000006115  | [X]Culture shock                                             | anxiety&neurosis | 296253014        | [X]Mixed obsessional thoughts and acts             | anxiety&neurosis |
| 2162210011       | [X]Da Costa's syndrome                                       | anxiety&neurosis | 399111000006118  | [X]Multiple psychosomatic disorder                 | anxiety&neurosis |
| 1755941000006114 | [X]Delayed post-traumat stress disorder follow military comb | anxiety&neurosis | 980191000006111  | [X]Needle phobia                                   | anxiety&neurosis |
| 376681000006119  | [X]Depersonalization - derealization syndrome                | anxiety&neurosis | 399841000006110  | [X]Neurasthenia                                    | anxiety&neurosis |
|                  |                                                              |                  | 2162212015       | [X]Neurocirculatory asthenia                       | anxiety&neurosis |

|                   |                                                      |                  |                 |                                                        |                  |
|-------------------|------------------------------------------------------|------------------|-----------------|--------------------------------------------------------|------------------|
| 122256015         | [X]Neurosis NOS                                      | anxiety&neurosis | 296252016       | [X]Predominantly compulsive acts [obsessional rituals] | anxiety&neurosis |
| 296358015         | [X]Neurotic disorder, unspecified                    | anxiety&neurosis | 296251011       | [X]Predominantly obsessional thoughts or ruminations   | anxiety&neurosis |
| 399981000006111   | [X]Neurotic, stress - related and somoform disorders | anxiety&neurosis | 423751000006119 | [X]Pseudoseizures                                      | anxiety&neurosis |
| 400201000006111   | [X]Nosophobia                                        | anxiety&neurosis | 423781000006110 | [X]Psychalgia                                          | anxiety&neurosis |
| 400321000006113   | [X]Obsessive - compulsive disorder                   | anxiety&neurosis | 423791000006113 | [X]Psychasthenia                                       | anxiety&neurosis |
| 296255019         | [X]Obsessive-compulsive disorder, unspecified        | anxiety&neurosis | 423801000006114 | [X]Psychasthenia neurosis                              | anxiety&neurosis |
| 400341000006118   | [X]Obsessive-compulsive neurosis                     | anxiety&neurosis | 423811000006112 | [X]Psychic shock                                       | anxiety&neurosis |
| 403531000006111   | [X]Occupational neurosis, including writer's cramp   | anxiety&neurosis | 1495560015      | [X]Psychogenic IBS                                     | anxiety&neurosis |
| 12703831000006115 | [X]Organic anxiety disorder                          | anxiety&neurosis | 423841000006111 | [X]Psychogenic aphonia                                 | anxiety&neurosis |
| 403931000006116   | [X]Organic anxiety disorder                          | anxiety&neurosis | 423851000006113 | [X]Psychogenic backache                                | anxiety&neurosis |
| 296238018         | [X]Other anxiety disorders                           | anxiety&neurosis | 423861000006110 | [X]Psychogenic confusion                               | anxiety&neurosis |
| 401885017         | [X]Other dissociative [conversion] disorders         | anxiety&neurosis | 1494938015      | [X]Psychogenic cough                                   | anxiety&neurosis |
| 296245018         | [X]Other mixed anxiety disorders                     | anxiety&neurosis | 423881000006117 | [X]Psychogenic deafness                                | anxiety&neurosis |
| 296341013         | [X]Other neurotic disorders                          | anxiety&neurosis | 1490285011      | [X]Psychogenic diarrhoea                               | anxiety&neurosis |
| 296254015         | [X]Other obsessive-compulsive disorders              | anxiety&neurosis | 215921000000112 | [X]Psychogenic dysmenorrhoea                           | anxiety&neurosis |
| 296236019         | [X]Other phobic anxiety disorders                    | anxiety&neurosis | 1494941012      | [X]Psychogenic dyspepsia                               | anxiety&neurosis |
| 296271019         | [X]Other reactions to severe stress                  | anxiety&neurosis | 215881000000118 | [X]Psychogenic dysphonia                               | anxiety&neurosis |
| 401887013         | [X]Other somatoform disorders                        | anxiety&neurosis | 1494943010      | [X]Psychogenic dysuria                                 | anxiety&neurosis |
| 401881014         | [X]Other specified anxiety disorders                 | anxiety&neurosis | 423951000006116 | [X]Psychogenic flatulence                              | anxiety&neurosis |
| 401888015         | [X]Other specified neurotic disorders                | anxiety&neurosis | 423961000006119 | [X]Psychogenic freq micturit                           | anxiety&neurosis |
| 418031000006113   | [X]Panic attack                                      | anxiety&neurosis | 423971000006114 | [X]Psychogenic headache                                | anxiety&neurosis |
| 296239014         | [X]Panic disorder [episodic paroxysmal anxiety]      | anxiety&neurosis | 1494939011      | [X]Psychogenic hiccough                                | anxiety&neurosis |
| 418051000006118   | [X]Panic disorder with agoraphobia                   | anxiety&neurosis | 1494940013      | [X]Psychogenic hyperventilat                           | anxiety&neurosis |
| 418061000006116   | [X]Panic state                                       | anxiety&neurosis | 424091000006113 | [X]Psychogenic pruritis                                | anxiety&neurosis |
| 419841000006116   | [X]Persistant anxiety depression                     | anxiety&neurosis | 1491595012      | [X]Psychogenic pylorospasm                             | anxiety&neurosis |
| 401886016         | [X]Persistent somatoform pain disorder               | anxiety&neurosis | 424111000006116 | [X]Psychogenic syncope                                 | anxiety&neurosis |
| 11920891000006113 | [X]Phobia NOS                                        | anxiety&neurosis | 424121000006112 | [X]Psychogenic torticollis                             | anxiety&neurosis |
| 420631000006114   | [X]Phobia NOS                                        | anxiety&neurosis | 424131000006110 | [X]Psychogenic twilight state                          | anxiety&neurosis |
| 420641000006116   | [X]Phobic anxiety disorder of childhood              | anxiety&neurosis | 424241000006114 | [X]Psychosomatic disorder NOS                          | anxiety&neurosis |
| 296237011         | [X]Phobic anxiety disorder, unspecified              | anxiety&neurosis | 424471000006119 | [X]Reaction to severe stress, and adjustment disorders | anxiety&neurosis |
| 296224013         | [X]Phobic anxiety disorders                          | anxiety&neurosis | 296272014       | [X]Reaction to severe stress, unspecified              | anxiety&neurosis |
| 420671000006112   | [X]Phobic state NOS                                  | anxiety&neurosis | 296722013       | [X]Separation anxiety disorder of childhood            | anxiety&neurosis |
| 423021000006114   | [X]Post - traumatic stress disorder                  | anxiety&neurosis | 426871000006113 | [X]Simple phobia                                       | anxiety&neurosis |

|                  |                                                    |                  |                  |                                                                |                       |
|------------------|----------------------------------------------------|------------------|------------------|----------------------------------------------------------------|-----------------------|
| 427051000006113  | [X]Social anxiety disorder of childhood            | anxiety&neurosis | 2308361000000115 | Suspected binge eating disorder                                | eating disorders      |
| 427061000006110  | [X]Social neurosis                                 | anxiety&neurosis | 295437018        | Unspecified non-organic eating disorder                        | eating disorders      |
| 427071000006115  | [X]Social phobias                                  | anxiety&neurosis | 317233013        | [D]Anorexia                                                    | eating disorders      |
| 215891000000116  | [X]Somatization disorder                           | anxiety&neurosis | 317235018        | [D]Anorexia NOS                                                | eating disorders      |
| 1495057015       | [X]Somatoform autonomic dysfunction                | anxiety&neurosis | 1222496015       | [D]Bulimia NOS                                                 | eating disorders      |
| 296340014        | [X]Somatoform disorder, unspecified                | anxiety&neurosis | 317257013        | [D]Excessive eating                                            | eating disorders      |
| 427131000006117  | [X]Somatoform disorders                            | anxiety&neurosis | 317258015        | [D]Hyperalimentation                                           | eating disorders      |
| 427141000006110  | [X]Somatoform pain disorder                        | anxiety&neurosis | 317255017        | [D]Polyphagia                                                  | eating disorders      |
| 427231000006111  | [X]Specific (isolated) phobias                     | anxiety&neurosis | 317259011        | [D]Polyphagia NOS                                              | eating disorders      |
| 428641000006119  | [X]Teeth-grinding                                  | anxiety&neurosis | 363321000006111  | [X]Anorexia nervosa                                            | eating disorders      |
| 296277015        | [X]Trance and possession disorders                 | anxiety&neurosis | 366521000006113  | [X]Atypical anorexia nervosa                                   | eating disorders      |
| 429421000006116  | [X]Traumatic neurosis                              | anxiety&neurosis | 366541000006118  | [X]Atypical bulimia nervosa                                    | eating disorders      |
| 429691000006116  | [X]Undifferentiated psychosomatic disorder         | anxiety&neurosis | 368061000006113  | [X]Bulimia NOS                                                 | eating disorders      |
| 429711000006118  | [X]Undifferentiated somatoform disorder            | anxiety&neurosis | 368051000006111  | [X]Bulimia nervosa                                             | eating disorders      |
| 94597012         | Anorexia nervosa                                   | eating disorders | 296379015        | [X]Eating disorder, unspecified                                | eating disorders      |
| 372208017        | Anorexia symptom                                   | eating disorders | 296361019        | [X]Eating disorders                                            | eating disorders      |
| 404431014        | Appetite loss - anorexia                           | eating disorders | 389311000006116  | [X]Hyperorexia nervosa                                         | eating disorders      |
| 370419010        | Binge eating                                       | eating disorders | 401889011        | [X]Other eating disorders                                      | eating disorders      |
| 527421000006116  | Bulimia (non-organic overeating)                   | eating disorders | 417851000006113  | [X]Overeating associated with other psychological disturbances | eating disorders      |
| 577901000006119  | Compulsive eating disorder                         | eating disorders | 420741000006110  | [X]Pica in adults                                              | eating disorders      |
| 295374018        | Cyclical vomiting - psychogenic                    | eating disorders | 424061000006117  | [X]Psychogenic overeating                                      | eating disorders      |
| 1127871000000119 | Dissatisfied with body image                       | eating disorders | 334547013        | [X]Starvation                                                  | eating disorders      |
| 397863019        | Excessive eating - polyphagia                      | eating disorders | 1495439012       | Affective personality disorder                                 | personality disorders |
| 251631011        | H/O: anorexia nervosa                              | eating disorders | 295048018        | Affective personality disorder NOS                             | personality disorders |
| 830401000006110  | Hyperalimentation - symptom                        | eating disorders | 474121000006111  | Aggressive personality                                         | personality disorders |
| 2159265012       | Nocturnal sleep-related eating disorder            | eating disorders | 295543019        | Aggressive unsocial conduct disorder                           | personality disorders |
| 295452013        | Non-organic eating disorder NOS                    | eating disorders | 480071000006112  | Amoral personality                                             | personality disorders |
| 295436010        | Other and unspecified non-organic eating disorders | eating disorders | 481471000006112  | Anancastic personality                                         | personality disorders |
| 295451018        | Other specified non-organic eating disorder        | eating disorders | 481481000006110  | Anankastic personality                                         | personality disorders |
| 407104010        | Polyphagia symptom                                 | eating disorders | 487991000006113  | Antisocial or sociopathic personality disorder                 | personality disorders |
| 1780181019       | Referral to eating disorders clinic                | eating disorders | 496091000006112  | Asthenic personality                                           | personality disorders |
| 664031000000110  | Seen in eating disorder clinic                     | eating disorders | 62962010         | Avoidant personality disorder                                  | personality disorders |
| 324685013        | Starvation                                         | eating disorders | 33677019         | Borderline personality disorder                                | personality disorders |
|                  |                                                    |                  | 295063015        | Compulsive personality disorder NOS                            | personality disorders |

|                 |                                            |                       |                 |                                                              |                       |
|-----------------|--------------------------------------------|-----------------------|-----------------|--------------------------------------------------------------|-----------------------|
| 577931000006110 | Compulsive personality disorders           | personality disorders | 295064014       | Unspecified histrionic personality disorder                  | personality disorders |
| 605901000006114 | Cyclothymic personality disorder           | personality disorders | 295049014       | Unspecified schizoid personality disorder                    | personality disorders |
| 223661000000115 | Dependent personality                      | personality disorders | 359041000006112 | [X] Munchausens syndrome                                     | personality disorders |
| 613781000006118 | Depressive personality disorder            | personality disorders | 2160091013      | [X]Addictive personality                                     | personality disorders |
| 401813018       | Disturbance of conduct NEC                 | personality disorders | 362761000006114 | [X]Affectionless psychopathy                                 | personality disorders |
| 295079019       | Eccentric personality disorder             | personality disorders | 362771000006119 | [X]Affective personality disorder                            | personality disorders |
| 640481000006113 | Emotionally unstable personality           | personality disorders | 362851000006118 | [X]Aggressive personality disorder                           | personality disorders |
| 347011014       | Explosive personality disorder             | personality disorders | 363081000006112 | [X]Amoral personality disorder                               | personality disorders |
| 295067019       | Histrionic personality disorder NOS        | personality disorders | 363221000006116 | [X]Anankastic personality disorder                           | personality disorders |
| 824751000006111 | Histrionic personality disorders           | personality disorders | 363561000006112 | [X]Antisocial personality disorder                           | personality disorders |
| 295045015       | Hypomanic personality disorder             | personality disorders | 363691000006117 | [X]Anxious [avoidant] personality disorder                   | personality disorders |
| 787571000006113 | Hysterical personality disorders           | personality disorders | 363921000006112 | [X]Asocial personality disorder                              | personality disorders |
| 295080016       | Immature personality disorder              | personality disorders | 366421000006114 | [X]Asthenic personality disorder                             | personality disorders |
| 782871000006113 | Inadequate personality disorder            | personality disorders | 366591000006110 | [X]Autistic psychopathy                                      | personality disorders |
| 735811000006119 | Labile personality                         | personality disorders | 367941000006111 | [X]Borderline personality disorder                           | personality disorders |
| 295081017       | Masochistic personality disorder           | personality disorders | 1222259010      | [X]Character neurosis NOS                                    | personality disorders |
| 701591000006118 | Mixed disturbance of conduct and emotion   | personality disorders | 371011000006114 | [X]Chronic pain personality syndrome                         | personality disorders |
| 481069014       | Munchausen's syndrome                      | personality disorders | 371331000006117 | [X]Compulsive gambling                                       | personality disorders |
| 133885012       | Narcissistic personality disorder          | personality disorders | 371341000006110 | [X]Compulsive personality disorder                           | personality disorders |
| 675901000006118 | Neurotic personality                       | personality disorders | 376261000006114 | [X]Cycloid personality                                       | personality disorders |
| 675911000006115 | Neurotic personality disorder              | personality disorders | 376301000006117 | [X]Cyclothymic personality                                   | personality disorders |
| 475487017       | Obsessional personality                    | personality disorders | 376671000006117 | [X]Dependent personality disorder                            | personality disorders |
| 401786010       | Other personality disorder NOS             | personality disorders | 376751000006117 | [X]Depressive personality disorder                           | personality disorders |
| 295077017       | Other personality disorders                | personality disorders | 296458019       | [X]Disorders of adult personality and behaviour              | personality disorders |
| 23211011        | Paranoid personality disorder              | personality disorders | 378071000006112 | [X]Dissocial personality disorder                            | personality disorders |
| 1230168015      | Passive-aggressive personality disorder    | personality disorders | 379511000006118 | [X]Eccentric personality disorder                            | personality disorders |
| 30550017        | Pathological gambling                      | personality disorders | 379571000006110 | [X]Elaboration of physical symptoms for psychological reason | personality disorders |
| 401787018       | Personality disorder NOS                   | personality disorders | 379701000006110 | [X]Emotionally unstable personality disorder                 | personality disorders |
| 230091000006118 | Personality disorders                      | personality disorders | 379811000006116 | [X]Enduring personality change after catastrophic experience | personality disorders |
| 401785014       | Psychoneurotic personality disorder        | personality disorders | 379821000006112 | [X]Enduring personality change after psychiatric illness     | personality disorders |
| 199821000006114 | Psychopathic personality                   | personality disorders | 379831000006110 | [X]Enduring personality change                               | personality disorders |
| 88108012        | Schizoid personality disorder              | personality disorders |                 |                                                              |                       |
| 295052018       | Schizoid personality disorder NOS          | personality disorders |                 |                                                              |                       |
| 155281000006119 | Schizotypal personality                    | personality disorders |                 |                                                              |                       |
| 295044016       | Unspecified affective personality disorder | personality disorders |                 |                                                              |                       |

|                  |                                                              |                       |  |                  |                                                               |                        |
|------------------|--------------------------------------------------------------|-----------------------|--|------------------|---------------------------------------------------------------|------------------------|
|                  | not attrib to brain damag/dis                                |                       |  |                  |                                                               |                        |
| 296508011        | [X]Enduring personality change, unspecified                  | personality disorders |  | 420431000006111  | [X]Personality change after concentration camp experiences    | personality disorders  |
| 380231000006114  | [X]Expansive paranoid personality disorder                   | personality disorders |  | 420441000006118  | [X]Personality change after disasters                         | personality disorders  |
| 380611000006117  | [X]Explosive personality disorder                            | personality disorders |  | 420451000006116  | [X]Personality change after torture                           | personality disorders  |
| 1870551000006113 | [X]Factitious disorder                                       | personality disorders |  | 296488011        | [X]Personality disorder, unspecified                          | personality disorders  |
| 296514016        | [X]Habit and impulse disorder, unspecified                   | personality disorders |  | 420501000006119  | [X]Personlty chang aft expos life-threat sit/victim/terrorism | personality disorders  |
| 388311000006110  | [X]Habit and impulse disorders                               | personality disorders |  | 424161000006118  | [X]Psychoinfantile personality disorder                       | personality disorders  |
| 388391000006117  | [X]Haltlose type personality disorder                        | personality disorders |  | 424201000006112  | [X]Psychoneurotic personality disorder                        | personality disorders  |
| 388871000006111  | [X]Histrionic personality disorder                           | personality disorders |  | 424211000006110  | [X]Psychopathic personality disorder                          | personality disorders  |
| 389441000006113  | [X]Hysterical personality disorder                           | personality disorders |  | 424331000006112  | [X]Querulant personality disorder                             | personality disorders  |
| 389491000006116  | [X]Immature personality disorder                             | personality disorders |  | 425591000006118  | [X]Schizoid personality disorder                              | personality disorders  |
| 389581000006115  | [X]Inadequate personality disorder                           | personality disorders |  | 425731000006110  | [X]Schizotypal personality disorder                           | personality disorders  |
| 392271000006112  | [X]Intent product/feign of symptom/disab eith physical/psych | personality disorders |  | 425841000006112  | [X]Self defeating personality disorder                        | personality disorders  |
| 296489015        | [X]Mixed and other personality disorders                     | personality disorders |  | 425911000006118  | [X]Sensitive paranoid personality disorder                    | personality disorders  |
| 850721000006111  | [X]Munchausen's by proxy                                     | personality disorders |  | 427091000006119  | [X]Sociopathic personality disorder                           | personality disorders  |
| 399451000006114  | [X]Narcissistic personality disorder                         | personality disorders |  | 296460017        | [X]Specific personality disorders                             | personality disorders  |
| 400311000006117  | [X]Obsessional personality disorder                          | personality disorders |  | 429561000006111  | [X]Trichotillomania                                           | personality disorders  |
| 400351000006116  | [X]Obsessive-compulsive personality disorder                 | personality disorders |  | 296549011        | [X]Unspecified disorder of adult personality and behaviour    | personality disorders  |
| 404021000006116  | [X]Organic personality disorder                              | personality disorders |  | 294751010        | Acute exacerbation of chronic catatonic schizophrenia         | schizophrenia spectrum |
| 404031000006118  | [X]Organic pseudopsychopathic personality                    | personality disorders |  | 4763641000006116 | Acute exacerbation of chronic disorganised schizophrenia      | schizophrenia spectrum |
| 296543012        | [X]Other disorders of adult personality and behaviour        | personality disorders |  | 4763661000006117 | Acute exacerbation of chronic disorganized schizophrenia      | schizophrenia spectrum |
| 401900011        | [X]Other enduring personality changes                        | personality disorders |  | 294739013        | Acute exacerbation of chronic hebephrenic schizophrenia       | schizophrenia spectrum |
| 296513010        | [X]Other habit and impulse disorders                         | personality disorders |  | 294769018        | Acute exacerbation of chronic latent schizophrenia            | schizophrenia spectrum |
| 401898014        | [X]Other specific personality disorders                      | personality disorders |  | 294758016        | Acute exacerbation of chronic paranoid schizophrenia          | schizophrenia spectrum |
| 414781000006118  | [X]Other specified disorders of adult personality/behaviour  | personality disorders |  | 456731000006115  | Acute exacerbation of chronic schizo-affective schizophrenia  | schizophrenia spectrum |
| 418201000006111  | [X]Paranoid personality disorder                             | personality disorders |  | 4763921000006118 | Acute exacerbation of chronic schizoaffective schizophrenia   | schizophrenia spectrum |
| 418531000006117  | [X]Passive personality disorder                              | personality disorders |  |                  |                                                               |                        |
| 418551000006112  | [X]Pathological fire-setting                                 | personality disorders |  |                  |                                                               |                        |
| 418561000006114  | [X]Pathological gambling                                     | personality disorders |  |                  |                                                               |                        |
| 418571000006119  | [X]Pathological personality NOS                              | personality disorders |  |                  |                                                               |                        |
| 418581000006116  | [X]Pathological stealing                                     | personality disorders |  |                  |                                                               |                        |
| 420421000006113  | [X]Personality change aft prolong                            | personality disorders |  |                  |                                                               |                        |



|                  |                                                                                               |                        |                  |                                                                            |                        |
|------------------|-----------------------------------------------------------------------------------------------|------------------------|------------------|----------------------------------------------------------------------------|------------------------|
| 294731011        | Acute exacerbation of chronic schizophrenia                                                   | schizophrenia spectrum |                  | without associated acute stress                                            |                        |
| 294750011        | Acute exacerbation of subchronic catatonic schizophrenia                                      | schizophrenia spectrum | 401763015        | Acute schizophrenic episode                                                | schizophrenia spectrum |
| 294738017        | Acute exacerbation of subchronic hebephrenic schizophrenia                                    | schizophrenia spectrum | 1219653018       | Atypical schizophrenia                                                     | schizophrenia spectrum |
| 294768014        | Acute exacerbation of subchronic latent schizophrenia                                         | schizophrenia spectrum | 523481000006114  | Bouffee delirante                                                          | schizophrenia spectrum |
| 294757014        | Acute exacerbation of subchronic paranoid schizophrenia                                       | schizophrenia spectrum | 10122017         | Brief reactive psychosis                                                   | schizophrenia spectrum |
| 4763911000006114 | Acute exacerbation of subchronic schizoaffective schizophrenia                                | schizophrenia spectrum | 294742019        | Catatonic schizophrenia                                                    | schizophrenia spectrum |
| 294730012        | Acute exacerbation of subchronic schizophrenia                                                | schizophrenia spectrum | 294753013        | Catatonic schizophrenia NOS                                                | schizophrenia spectrum |
| 456801000006115  | Acute exacerbation subchronic schizoaffective schizophrenia                                   | schizophrenia spectrum | 178723016        | Catatonic schizophrenia in remission                                       | schizophrenia spectrum |
| 294919015        | Acute hysterical psychosis                                                                    | schizophrenia spectrum | 1974891000006117 | Catatonic schizophrenia, complete remission                                | schizophrenia spectrum |
| 401770015        | Acute paranoid reaction                                                                       | schizophrenia spectrum | 1974751000006117 | Catatonic schizophrenia, continuous                                        | schizophrenia spectrum |
| 1975691000006115 | Acute polymorphic psychot disord with symp of schizophren, with associated acute stress       | schizophrenia spectrum | 1974921000006111 | Catatonic schizophrenia, course uncertain, period of observation too short | schizophrenia spectrum |
| 1975681000006118 | Acute polymorphic psychot disord with symp of schizophren, without associated acute stress    | schizophrenia spectrum | 1974831000006116 | Catatonic schizophrenia, episodic remittent                                | schizophrenia spectrum |
| 1975671000006116 | Acute polymorphic psychot disord without symp of schizophren, with associated acute stress    | schizophrenia spectrum | 1974781000006113 | Catatonic schizophrenia, episodic with progressive deficit                 | schizophrenia spectrum |
| 1975621000006117 | Acute polymorphic psychot disord without symp of schizophren, without associated acute stress | schizophrenia spectrum | 1974801000006112 | Catatonic schizophrenia, episodic with stable deficit                      | schizophrenia spectrum |
| 7696261000006113 | Acute polymorphic psychotic disorder with symptoms of schizophrenia                           | schizophrenia spectrum | 1974861000006113 | Catatonic schizophrenia, incomplete remission                              | schizophrenia spectrum |
| 882301000006112  | Acute schizoaffective psychosis                                                               | schizophrenia spectrum | 1976901000006114 | Catatonic schizophrenia, other                                             | schizophrenia spectrum |
| 1975731000006111 | Acute schizophrenia-like psychotic disorder, with associated acute stress                     | schizophrenia spectrum | 294788013        | Genesthopathic schizophrenia                                               | schizophrenia spectrum |
| 1975711000006117 | Acute schizophrenia-like psychotic disorder,                                                  | schizophrenia spectrum | 114616017        | Chronic catatonic schizophrenia                                            | schizophrenia spectrum |
|                  |                                                                                               |                        | 4763751000006112 | Chronic catatonic schizophrenia with acute exacerbation                    | schizophrenia spectrum |
|                  |                                                                                               |                        | 2705561000006112 | Chronic disorganized schizophrenia                                         | schizophrenia spectrum |
|                  |                                                                                               |                        | 2705571000006117 | Chronic disorganized schizophrenia                                         | schizophrenia spectrum |
|                  |                                                                                               |                        | 294737010        | Chronic hebephrenic schizophrenia                                          | schizophrenia spectrum |
|                  |                                                                                               |                        | 294767016        | Chronic latent schizophrenia                                               | schizophrenia spectrum |

|                  |                                                        |                        |                  |                                                                               |                        |
|------------------|--------------------------------------------------------|------------------------|------------------|-------------------------------------------------------------------------------|------------------------|
| 401768012        | Chronic paranoid psychosis                             | schizophrenia spectrum | 294740010        | Hebephrenic schizophrenia in remission                                        | schizophrenia spectrum |
| 52897013         | Chronic paranoid schizophrenia                         | schizophrenia spectrum | 1974691000006116 | Hebephrenic schizophrenia, complete remission                                 | schizophrenia spectrum |
| 4763791000006118 | Chronic paranoid schizophrenia with acute exacerbation | schizophrenia spectrum | 1974601000006111 | Hebephrenic schizophrenia, continuous                                         | schizophrenia spectrum |
| 556631000006116  | Chronic schizoaffective schizophrenia                  | schizophrenia spectrum | 1974721000006114 | Hebephrenic schizophrenia, course uncertain, period of observation too short  | schizophrenia spectrum |
| 3862661000006112 | Chronic schizophrenia                                  | schizophrenia spectrum | 1974641000006113 | Hebephrenic schizophrenia, episodic remittent                                 | schizophrenia spectrum |
| 1234861017       | Chronic schizophrenic                                  | schizophrenia spectrum | 1974611000006114 | Hebephrenic schizophrenia, episodic with progressive deficit                  | schizophrenia spectrum |
| 294787015        | Coenesthopathic schizophrenia                          | schizophrenia spectrum | 1974621000006118 | Hebephrenic schizophrenia, episodic with stable deficit                       | schizophrenia spectrum |
| 294773015        | Cyclic schizophrenia                                   | schizophrenia spectrum | 1974671000006117 | Hebephrenic schizophrenia, incomplete remission                               | schizophrenia spectrum |
| 4569010          | Delusion                                               | schizophrenia spectrum | 1976891000006110 | Hebephrenic schizophrenia, other                                              | schizophrenia spectrum |
| 1452014          | Delusion of persecution                                | schizophrenia spectrum | 4539931000006112 | History of schizophrenia                                                      | schizophrenia spectrum |
| 480834016        | Delusions                                              | schizophrenia spectrum | 492910018        | Ideas of reference                                                            | schizophrenia spectrum |
| 119579013        | Disintegrative psychosis                               | schizophrenia spectrum | 294764011        | Latent schizophrenia                                                          | schizophrenia spectrum |
| 3068121000006112 | Disorganised schizophrenia                             | schizophrenia spectrum | 294771018        | Latent schizophrenia NOS                                                      | schizophrenia spectrum |
| 3005591000006114 | Disorganised schizophrenia in remission                | schizophrenia spectrum | 294770017        | Latent schizophrenia in remission                                             | schizophrenia spectrum |
| 3068131000006110 | Disorganized schizophrenia                             | schizophrenia spectrum | 4763861000006116 | Latent schizophrenia, in remission                                            | schizophrenia spectrum |
| 3005601000006118 | Disorganized schizophrenia in remission                | schizophrenia spectrum | 1974651000006110 | Mental & behav dis due to use tobacco: psychotic disorder, schizophrenia-like | schizophrenia spectrum |
| 3005611000006115 | Disorganized schizophrenia, in remission               | schizophrenia spectrum | 5517971000006118 | Mixed schizophrenic and affective psychosis                                   | schizophrenia spectrum |
| 294908018        | Folie a deux                                           | schizophrenia spectrum | 294724012        | Non-organic psychoses                                                         | schizophrenia spectrum |
| 369805011        | Grandiose delusions                                    | schizophrenia spectrum | 401771016        | Non-organic psychosis NOS                                                     | schizophrenia spectrum |
| 300411000000110  | H/O: psychosis                                         | schizophrenia spectrum | 223611000000117  | Nonorganic psychosis NOS                                                      | schizophrenia spectrum |
| 251628010        | H/O: schizophrenia                                     | schizophrenia spectrum | 2549426013       | O/E - delusion of persecution                                                 | schizophrenia spectrum |
| 501492014        | Hallucinations                                         | schizophrenia spectrum | 2549129012       | O/E - paranoid delusions                                                      | schizophrenia spectrum |
| 819351000006115  | Hebephrenic schizophrenia                              | schizophrenia spectrum |                  |                                                                               |                        |
| 294741014        | Hebephrenic schizophrenia NOS                          | schizophrenia spectrum |                  |                                                                               |                        |

|                  |                                                                        |                        |                  |                                                                                  |                        |
|------------------|------------------------------------------------------------------------|------------------------|------------------|----------------------------------------------------------------------------------|------------------------|
| 450785011        | Oneirophrenia                                                          | schizophrenia spectrum | 105029017        | Paranoid schizophrenia in remission                                              | schizophrenia spectrum |
| 294902017        | Other affective psychosis NOS                                          | schizophrenia spectrum | 1974511000006113 | Paranoid schizophrenia, complete remission                                       | schizophrenia spectrum |
| 294897018        | Other and unspecified affective psychoses                              | schizophrenia spectrum | 1974351000006118 | Paranoid schizophrenia, continuous                                               | schizophrenia spectrum |
| 25461000006115   | Other nonorganic psychoses                                             | schizophrenia spectrum | 1974541000006112 | Paranoid schizophrenia, course uncertain, period of observation too short        | schizophrenia spectrum |
| 294910016        | Other paranoid states                                                  | schizophrenia spectrum | 1974451000006113 | Paranoid schizophrenia, episodic remittent                                       | schizophrenia spectrum |
| 294912012        | Other paranoid states NOS                                              | schizophrenia spectrum | 1974391000006112 | Paranoid schizophrenia, episodic with progressive deficit                        | schizophrenia spectrum |
| 294926015        | Other reactive psychoses                                               | schizophrenia spectrum | 1974431000006118 | Paranoid schizophrenia, episodic with stable deficit                             | schizophrenia spectrum |
| 294929010        | Other reactive psychoses NOS                                           | schizophrenia spectrum | 3527411000006119 | Paranoid schizophrenia, in remission                                             | schizophrenia spectrum |
| 401764014        | Other schizophrenia                                                    | schizophrenia spectrum | 1974481000006117 | Paranoid schizophrenia, incomplete remission                                     | schizophrenia spectrum |
| 294789017        | Other schizophrenia NOS                                                | schizophrenia spectrum | 1976881000006112 | Paranoid schizophrenia, other                                                    | schizophrenia spectrum |
| 1975881000006119 | Other schizophrenia, complete remission                                | schizophrenia spectrum | 243361000006117  | Paranoid states                                                                  | schizophrenia spectrum |
| 1975751000006116 | Other schizophrenia, continuous                                        | schizophrenia spectrum | 44335019         | Paraphrenia                                                                      | schizophrenia spectrum |
| 1975911000006119 | Other schizophrenia, course uncertain, period of observation too short | schizophrenia spectrum | 3555731000006114 | Paraphrenic schizophrenia                                                        | schizophrenia spectrum |
| 1975831000006115 | Other schizophrenia, episodic remittent                                | schizophrenia spectrum | 215691000006112  | Poor insight into psychotic condition                                            | schizophrenia spectrum |
| 1975771000006114 | Other schizophrenia, episodic with progressive deficit                 | schizophrenia spectrum | 5023901000006110 | Post-schizophrenic depression                                                    | schizophrenia spectrum |
| 1975801000006111 | Other schizophrenia, episodic with stable deficit                      | schizophrenia spectrum | 1975301000006116 | Post-schizophrenic depression, complete remission                                | schizophrenia spectrum |
| 1975841000006113 | Other schizophrenia, incomplete remission                              | schizophrenia spectrum | 1975191000006114 | Post-schizophrenic depression, continuous                                        | schizophrenia spectrum |
| 1976951000006113 | Other schizophrenia, other                                             | schizophrenia spectrum | 1975321000006114 | Post-schizophrenic depression, course uncertain, period of observation too short | schizophrenia spectrum |
| 294949018        | Other specified non-organic psychoses                                  | schizophrenia spectrum | 1975261000006113 | Post-schizophrenic depression, episodic remittent                                | schizophrenia spectrum |
| 294911017        | Paranoia querulans                                                     | schizophrenia spectrum | 1975211000006110 | Post-schizophrenic depression, episodic with progressive deficit                 | schizophrenia spectrum |
| 2548181016       | Paranoid ideation                                                      | schizophrenia spectrum | 1975231000006116 | Post-schizophrenic depression, episodic with stable deficit                      | schizophrenia spectrum |
| 294913019        | Paranoid psychosis NOS                                                 | schizophrenia spectrum |                  |                                                                                  |                        |
| 107878010        | Paranoid schizophrenia                                                 | schizophrenia spectrum |                  |                                                                                  |                        |
| 294760019        | Paranoid schizophrenia NOS                                             | schizophrenia spectrum |                  |                                                                                  |                        |

|                  |                                                                           |                        |                  |                                                                               |                        |
|------------------|---------------------------------------------------------------------------|------------------------|------------------|-------------------------------------------------------------------------------|------------------------|
| 1975281000006115 | Post-schizophrenic depression, incomplete remission                       | schizophrenia spectrum | 169061000006112  | Restzustand - schizophrenia                                                   | schizophrenia spectrum |
| 1976921000006116 | Post-schizophrenic depression, other                                      | schizophrenia spectrum | 155141000006116  | Schizo-affective schizophrenia                                                | schizophrenia spectrum |
| 294924017        | Psychogenic paranoid psychosis                                            | schizophrenia spectrum | 155161000006117  | Schizo-affective schizophrenia NOS                                            | schizophrenia spectrum |
| 294933015        | Psychoses with origin in childhood                                        | schizophrenia spectrum | 155151000006119  | Schizo-affective schizophrenia in remission                                   | schizophrenia spectrum |
| 492881000000114  | Psychosis resolved                                                        | schizophrenia spectrum | 4763941000006113 | Schizoaffective schizophrenia, in remission                                   | schizophrenia spectrum |
| 996171000006114  | Psychosis, schizophrenia + bipolar affective disord resolved              | schizophrenia spectrum | 294790014        | Schizophrenia NOS                                                             | schizophrenia spectrum |
| 402504012        | Psychotic condition, insight present                                      | schizophrenia spectrum | 4538451000006117 | Schizophrenia assoc'n member                                                  | schizophrenia spectrum |
| 346895011        | Psychotic episode NOS                                                     | schizophrenia spectrum | 9225016          | Schizophrenia in remission                                                    | schizophrenia spectrum |
| 294918011        | Psychotic reactive depression                                             | schizophrenia spectrum | 492821000000113  | Schizophrenia resolved                                                        | schizophrenia spectrum |
| 294920014        | Reactive confusion                                                        | schizophrenia spectrum | 294726014        | Schizophrenia simplex                                                         | schizophrenia spectrum |
| 346896012        | Reactive psychoses                                                        | schizophrenia spectrum | 4763691000006113 | Schizophrenia, catatonic                                                      | schizophrenia spectrum |
| 300931000000113  | Referral to psychosis early intervention service                          | schizophrenia spectrum | 4196171000006118 | Schizophrenia, catatonic, in remission                                        | schizophrenia spectrum |
| 294939016        | Residual disintegrative psychoses                                         | schizophrenia spectrum | 2577941000006118 | Schizophrenia, in remission                                                   | schizophrenia spectrum |
| 43595011         | Residual schizophrenia                                                    | schizophrenia spectrum | 4763951000006110 | Schizophrenia, schizoaffective, in remission                                  | schizophrenia spectrum |
| 1975471000006119 | Residual schizophrenia, complete remission                                | schizophrenia spectrum | 1976151000006111 | Schizophrenia, unspecified, complete remission                                | schizophrenia spectrum |
| 1975351000006117 | Residual schizophrenia, continuous                                        | schizophrenia spectrum | 1976001000006113 | Schizophrenia, unspecified, continuous                                        | schizophrenia spectrum |
| 1975481000006116 | Residual schizophrenia, course uncertain, period of observation too short | schizophrenia spectrum | 1976171000006118 | Schizophrenia, unspecified, course uncertain, period of observation too short | schizophrenia spectrum |
| 1975431000006117 | Residual schizophrenia, episodic remittent                                | schizophrenia spectrum | 1976121000006119 | Schizophrenia, unspecified, episodic remittent                                | schizophrenia spectrum |
| 1975381000006113 | Residual schizophrenia, episodic with progressive deficit                 | schizophrenia spectrum | 1976061000006114 | Schizophrenia, unspecified, episodic with progressive deficit                 | schizophrenia spectrum |
| 1975401000006113 | Residual schizophrenia, episodic with stable deficit                      | schizophrenia spectrum | 1976101000006112 | Schizophrenia, unspecified, episodic with stable deficit                      | schizophrenia spectrum |
| 1975441000006110 | Residual schizophrenia, incomplete remission                              | schizophrenia spectrum | 1976141000006114 | Schizophrenia, unspecified, incomplete remission                              | schizophrenia spectrum |
| 1976931000006118 | Residual schizophrenia, other                                             | schizophrenia spectrum | 1976961000006110 | Schizophrenia, unspecified, other                                             | schizophrenia spectrum |
|                  |                                                                           |                        | 294725013        | Schizophrenic disorders                                                       | schizophrenia spectrum |

|                  |                                                                         |                        |                  |                                                                                   |                        |
|------------------|-------------------------------------------------------------------------|------------------------|------------------|-----------------------------------------------------------------------------------|------------------------|
| 4763701000006113 | Schizophrenic flexibilitas cerea                                        | schizophrenia spectrum | 2938961000006110 | Subchronic disorganized schizophrenia                                             | schizophrenia spectrum |
| 5248961000006113 | Schizophrenic prodrome                                                  | schizophrenia spectrum | 2726271000006118 | Subchronic disorganized schizophrenia with acute exacerbations                    | schizophrenia spectrum |
| 882291000006111  | Schizophrenic psychoses                                                 | schizophrenia spectrum | 294736018        | Subchronic hebephrenic schizophrenia                                              | schizophrenia spectrum |
| 882281000006113  | Schizophrenic psychoses NOS                                             | schizophrenia spectrum | 294766013        | Subchronic latent schizophrenia                                                   | schizophrenia spectrum |
| 3878611000006116 | Schizophreniform psychosis, depressive type                             | schizophrenia spectrum | 132503015        | Subchronic paranoid schizophrenia                                                 | schizophrenia spectrum |
| 5524571000006112 | Schizophreniform psychosis, manic type                                  | schizophrenia spectrum | 4763771000006119 | Subchronic paranoid schizophrenia with acute exacerbation                         | schizophrenia spectrum |
| 294909014        | Shared paranoid disorder                                                | schizophrenia spectrum | 123611000006110  | Subchronic schizoaffective schizophrenia                                          | schizophrenia spectrum |
| 294904016        | Simple paranoid state                                                   | schizophrenia spectrum | 4763891000006112 | Subchronic schizoaffective schizophrenia                                          | schizophrenia spectrum |
| 294727017        | Simple schizophrenia                                                    | schizophrenia spectrum | 28758018         | Subchronic schizophrenia                                                          | schizophrenia spectrum |
| 294734015        | Simple schizophrenia NOS                                                | schizophrenia spectrum | 4196151000006111 | Subchronic schizophrenia with acute exacerbations                                 | schizophrenia spectrum |
| 1975601000006110 | Simple schizophrenia, complete remission                                | schizophrenia spectrum | 1975081000006110 | Undifferentiated schizophrenia, complete remission                                | schizophrenia spectrum |
| 1975491000006118 | Simple schizophrenia, continuous                                        | schizophrenia spectrum | 1974951000006119 | Undifferentiated schizophrenia, continuous                                        | schizophrenia spectrum |
| 1975641000006112 | Simple schizophrenia, course uncertain, period of observation too short | schizophrenia spectrum | 1975161000006118 | Undifferentiated schizophrenia, course uncertain, period of observation too short | schizophrenia spectrum |
| 1975551000006113 | Simple schizophrenia, episodic remittent                                | schizophrenia spectrum | 1975021000006111 | Undifferentiated schizophrenia, episodic remittent                                | schizophrenia spectrum |
| 1975501000006114 | Simple schizophrenia, episodic with progressive deficit                 | schizophrenia spectrum | 1974971000006112 | Undifferentiated schizophrenia, episodic with progressive deficit                 | schizophrenia spectrum |
| 1975521000006116 | Simple schizophrenia, episodic with stable deficit                      | schizophrenia spectrum | 1975001000006118 | Undifferentiated schizophrenia, episodic with stable deficit                      | schizophrenia spectrum |
| 1975571000006115 | Simple schizophrenia, incomplete remission                              | schizophrenia spectrum | 1975051000006119 | Undifferentiated schizophrenia, incomplete remission                              | schizophrenia spectrum |
| 1976941000006111 | Simple schizophrenia, other                                             | schizophrenia spectrum | 1976911000006112 | Undifferentiated schizophrenia, other                                             | schizophrenia spectrum |
| 71539017         | Subchronic catatonic schizophrenia                                      | schizophrenia spectrum | 294898011        | Unspecified affective psychoses NOS                                               | schizophrenia spectrum |
| 4763731000006117 | Subchronic catatonic schizophrenia with acute exacerbation              | schizophrenia spectrum | 294744018        | Unspecified catatonic schizophrenia                                               | schizophrenia spectrum |
| 2938951000006113 | Subchronic disorganized schizophrenia                                   | schizophrenia spectrum | 294735019        | Unspecified hebephrenic schizophrenia                                             | schizophrenia spectrum |
| 2726261000006113 | Subchronic disorganized schizophrenia with acute exacerbations          | schizophrenia spectrum | 294765012        | Unspecified latent schizophrenia                                                  | schizophrenia spectrum |

|                 |                                                              |                        |                 |                                                     |                        |
|-----------------|--------------------------------------------------------------|------------------------|-----------------|-----------------------------------------------------|------------------------|
| 294754019       | Unspecified paranoid schizophrenia                           | schizophrenia spectrum | 368011000006110 | [X]Brief schizophreniform psych                     | schizophrenia spectrum |
| 78531000006116  | Unspecified schizoaffective schizophrenia                    | schizophrenia spectrum | 914461000006118 | [X]Capgras syndrome                                 | schizophrenia spectrum |
| 294728010       | Unspecified schizophrenia                                    | schizophrenia spectrum | 370451000006110 | [X]Catatonic schizophrenia                          | schizophrenia spectrum |
| 499799011       | Visual hallucinations                                        | schizophrenia spectrum | 370461000006112 | [X]Catatonic stupor                                 | schizophrenia spectrum |
| 317003012       | [D]Hallucinations                                            | schizophrenia spectrum | 370631000006117 | [X]Cenesthopathic schizophrenia                     | schizophrenia spectrum |
| 317009011       | [D]Hallucinations NOS                                        | schizophrenia spectrum | 370981000006112 | [X]Chronic hallucinatory psychosis                  | schizophrenia spectrum |
| 317004018       | [D]Hallucinations, auditory                                  | schizophrenia spectrum | 371031000006115 | [X]Chronic undifferentiated schizophrenia           | schizophrenia spectrum |
| 317005017       | [D]Hallucinations, gustatory                                 | schizophrenia spectrum | 967791000006111 | [X]Cotard syndrome                                  | schizophrenia spectrum |
| 317006016       | [D]Hallucinations, olfactory                                 | schizophrenia spectrum | 376251000006112 | [X]Cyclic schizophrenia                             | schizophrenia spectrum |
| 317007013       | [D]Hallucinations, tactile                                   | schizophrenia spectrum | 376271000006119 | [X]Cycloid psychosis                                | schizophrenia spectrum |
| 317008015       | [D]Visual hallucinations                                     | schizophrenia spectrum | 376281000006116 | [X]Cycloid psychosis with symptoms of schizophrenia | schizophrenia spectrum |
| 460273017       | [V]Personal history of schizophrenia                         | schizophrenia spectrum | 215841000000114 | [X]Delusional disorder                              | schizophrenia spectrum |
| 359091000006115 | [X] Presenile psychosis NOS                                  | schizophrenia spectrum | 376501000006110 | [X]Delusional dysmorphophobia                       | schizophrenia spectrum |
| 401860014       | [X]Acute and transient psychotic disorder, unspecified       | schizophrenia spectrum | 914471000006113 | [X]Delusional misidentification syndrome            | schizophrenia spectrum |
| 362271000006110 | [X]Acute and transient psychotic disorders                   | schizophrenia spectrum | 377461000006113 | [X]Disintegrative psychosis                         | schizophrenia spectrum |
| 362381000006115 | [X]Acute polymorphic psychot disord with symp of schizophren | schizophrenia spectrum | 378051000006119 | [X]Disorganised schizophrenia                       | schizophrenia spectrum |
| 362391000006117 | [X]Acute polymorphic psychot disord without symp of schizoph | schizophrenia spectrum | 387071000006117 | [X]Folie a deux                                     | schizophrenia spectrum |
| 362421000006113 | [X]Acute schizophrenia-like psychotic disorder               | schizophrenia spectrum | 388741000006110 | [X]Hebephrenic schizophrenia                        | schizophrenia spectrum |
| 366571000006114 | [X]Atypical schizophrenia                                    | schizophrenia spectrum | 389451000006110 | [X]Hysterical psychosis                             | schizophrenia spectrum |
| 367951000006113 | [X]Borderline schizophrenia                                  | schizophrenia spectrum | 389641000006110 | [X]Induced delusional disorder                      | schizophrenia spectrum |
| 367961000006110 | [X]Bouffee delirante                                         | schizophrenia spectrum | 389651000006112 | [X]Induced paranoid disorder                        | schizophrenia spectrum |
| 367971000006115 | [X]Bouffee delirante with symptoms of schizophrenia          | schizophrenia spectrum | 389661000006114 | [X]Induced psychotic disorder                       | schizophrenia spectrum |
| 367991000006119 | [X]Brief reactive psychosis NOS                              | schizophrenia spectrum | 394461000006110 | [X]Involuntal paranoid state                        | schizophrenia spectrum |
| 368001000006112 | [X]Brief schizophreniform disorder                           | schizophrenia spectrum | 395021000006111 | [X]Latent schizophrenia                             | schizophrenia spectrum |

|                  |                                                             |                        |                   |                                                        |                        |
|------------------|-------------------------------------------------------------|------------------------|-------------------|--------------------------------------------------------|------------------------|
| 395031000006114  | [X]Latent schizophrenic reaction                            | schizophrenia spectrum | 423731000006114   | [X]Pseudoneurotic schizophrenia                        | schizophrenia spectrum |
| 398631000006113  | [X]Mixed schizophrenic and affective psychosis              | schizophrenia spectrum | 423741000006116   | [X]Pseudopsychopathic schizophrenia                    | schizophrenia spectrum |
| 1667591000000111 | [X]Nonorganic psychosis in remission                        | schizophrenia spectrum | 424071000006112   | [X]Psychogenic paranoid psychosis                      | schizophrenia spectrum |
| 403961000006113  | [X]Organic delusional [schizophrenia-like] disorder         | schizophrenia spectrum | 424231000006116   | [X]Psychosis NOS                                       | schizophrenia spectrum |
| 296083012        | [X]Other acute and transient psychotic disorders            | schizophrenia spectrum | 424281000006115   | [X]Puerperal psychosis NOS                             | schizophrenia spectrum |
| 401859016        | [X]Other acute predominantly delusional psychotic disorders | schizophrenia spectrum | 424511000006112   | [X]Reactive psychosis                                  | schizophrenia spectrum |
| 318027012        | [X]Other hallucinations                                     | schizophrenia spectrum | 424841000006113   | [X]Residual schizophrenia                              | schizophrenia spectrum |
| 412201000006113  | [X]Other nonorganic psychotic disorders                     | schizophrenia spectrum | 424931000006113   | [X]Restzustand schizophrenic                           | schizophrenia spectrum |
| 401857019        | [X]Other persistent delusional disorders                    | schizophrenia spectrum | 425501000006113   | [X]Schizoaffective disorder, depressive type           | schizophrenia spectrum |
| 296095012        | [X]Other schizoaffective disorders                          | schizophrenia spectrum | 425511000006111   | [X]Schizoaffective disorder, manic type                | schizophrenia spectrum |
| 401855010        | [X]Other schizophrenia                                      | schizophrenia spectrum | 425521000006115   | [X]Schizoaffective disorder, mixed type                | schizophrenia spectrum |
| 215871000000115  | [X]Paranoia                                                 | schizophrenia spectrum | 296096013         | [X]Schizoaffective disorder, unspecified               | schizophrenia spectrum |
| 418181000006110  | [X]Paranoia querulans                                       | schizophrenia spectrum | 425541000006110   | [X]Schizoaffective disorders                           | schizophrenia spectrum |
| 215851000000112  | [X]Paranoid psychosis                                       | schizophrenia spectrum | 425551000006112   | [X]Schizoaffective psychosis NOS                       | schizophrenia spectrum |
| 418221000006118  | [X]Paranoid schizophrenia                                   | schizophrenia spectrum | 425561000006114   | [X]Schizoaffective psychosis, depressive type          | schizophrenia spectrum |
| 418231000006115  | [X]Paranoid state                                           | schizophrenia spectrum | 425571000006119   | [X]Schizoaffective psychosis, manic type               | schizophrenia spectrum |
| 1667581000000114 | [X]Paranoid state in remission                              | schizophrenia spectrum | 425601000006114   | [X]Schizophrenia                                       | schizophrenia spectrum |
| 418251000006110  | [X]Paraphrenia - late                                       | schizophrenia spectrum | 12480451000006112 | [X]Schizophrenia, schizotypal and delusional disorders | schizophrenia spectrum |
| 418261000006112  | [X]Paraphrenic schizophrenia                                | schizophrenia spectrum | 296022017         | [X]Schizophrenia, schizotypal and delusional disorders | schizophrenia spectrum |
| 296066015        | [X]Persistent delusional disorder, unspecified              | schizophrenia spectrum | 296040018         | [X]Schizophrenia, unspecified                          | schizophrenia spectrum |
| 419861000006117  | [X]Persistent delusional disorders                          | schizophrenia spectrum | 425641000006111   | [X]Schizophrenic catalepsy                             | schizophrenia spectrum |
| 423041000006119  | [X]Post-schizophrenic depression                            | schizophrenia spectrum | 425651000006113   | [X]Schizophrenic catatonia                             | schizophrenia spectrum |
| 423271000006116  | [X]Prepsychotic schizophrenia                               | schizophrenia spectrum | 294743012         | [X]Schizophrenic flexibilatis cerea                    | schizophrenia spectrum |
| 423471000006117  | [X]Prodromal schizophrenia                                  | schizophrenia spectrum | 425671000006115   | [X]Schizophrenic reaction                              | schizophrenia spectrum |

|                  |                                                             |                        |                  |                                                        |                 |
|------------------|-------------------------------------------------------------|------------------------|------------------|--------------------------------------------------------|-----------------|
| 425681000006117  | [X]Schizophreniform disord NOS                              | schizophrenia spectrum | 2558681000006115 | Circadian rhythm sleep disorder                        | sleep disorders |
| 425691000006119  | [X]Schizophreniform psychosis, depressive type              | schizophrenia spectrum | 5008741000006111 | Circadian rhythm sleep disorder, free-running type     | sleep disorders |
| 425701000006119  | [X]Schizophreniform psychosis, manic type                   | schizophrenia spectrum | 841621000006110  | Delayed Onset Of Sleep                                 | sleep disorders |
| 425711000006116  | [X]Schizophreniform psychos NOS                             | schizophrenia spectrum | 1780361011       | Delayed onset of sleep                                 | sleep disorders |
| 401856011        | [X]Schizotypal disorder                                     | schizophrenia spectrum | 917101000006119  | Delayed onset of sleep                                 | sleep disorders |
| 425921000006114  | [X]Sensitiver Beziehungswahn                                | schizophrenia spectrum | 3459321000006115 | Difficulty falling asleep                              | sleep disorders |
| 426881000006111  | [X]Simple schizophrenia                                     | schizophrenia spectrum | 3459341000006110 | Difficulty getting to sleep                            | sleep disorders |
| 428441000006116  | [X]Symbiotic psychosis                                      | schizophrenia spectrum | 3459331000006117 | Difficulty in sleep initiation                         | sleep disorders |
| 428451000006119  | [X]Symptomatic psychosis NOS                                | schizophrenia spectrum | 3593451000006117 | Difficulty in sleep maintenance                        | sleep disorders |
| 296031017        | [X]Undifferentiated schizophrenia                           | schizophrenia spectrum | 1806241000006116 | Difficulty sleeping                                    | sleep disorders |
| 401862018        | [X]Unspecified nonorganic psychosis                         | schizophrenia spectrum | 3593391000006118 | Difficulty staying asleep                              | sleep disorders |
| 295427011        | 'Short-sleeper'                                             | sleep disorders        | 5529451000006119 | Disorder of sleep-wake cycle                           | sleep disorders |
| 3191221000006119 | Acute sleeping sickness                                     | sleep disorders        | 5529491000006113 | Disorder of sleep-wake schedule                        | sleep disorders |
| 3593421000006114 | Broken sleep                                                | sleep disorders        | 299274011        | Disorders of initiating and maintaining sleep          | sleep disorders |
| 407067015        | C/O - insomnia                                              | sleep disorders        | 406739012        | Disorders of the sleep-wake schedule                   | sleep disorders |
| 252940010        | C/O nightmares                                              | sleep disorders        | 1234153012       | Excessive sleep                                        | sleep disorders |
| 8058301000006110 | COPD (chronic obstructive pulmonary disease) disturbs sleep | sleep disorders        | 3764071000006116 | Excessive sleepiness                                   | sleep disorders |
| 2939291000006118 | CSA - Central sleep apnea                                   | sleep disorders        | 5008721000006116 | Free-running sleep-wake cycle disorder                 | sleep disorders |
| 2939271000006119 | CSA - Central sleep apnoea                                  | sleep disorders        | 1994261000006118 | History of rough sleeping                              | sleep disorders |
| 3459351000006112 | Cannot get off to sleep                                     | sleep disorders        | 1772801000006112 | Hypersomnia                                            | sleep disorders |
| 217721000000117  | Cannot sleep - insomnia                                     | sleep disorders        | 3764081000006118 | Hypersomnia (excessive sleeping)                       | sleep disorders |
| 77147016         | Cataplexy                                                   | sleep disorders        | 345379011        | Hypersomnia NOS                                        | sleep disorders |
| 297357017        | Cataplexy and narcolepsy                                    | sleep disorders        | 345382018        | Hypersomnia of non-organic origin                      | sleep disorders |
| 297358010        | Cataplexy or narcolepsy NOS                                 | sleep disorders        | 3789311000006111 | Hypersomnia with sleep apnea                           | sleep disorders |
| 2939301000006117 | Central sleep apnea                                         | sleep disorders        | 5008591000006110 | Hypersomnia, nonorganic                                | sleep disorders |
| 2939261000006114 | Central sleep apnea syndrome                                | sleep disorders        | 1772821000006119 | Idiopathic hypersomnia associated with long sleep time | sleep disorders |
| 1772651000006110 | Central sleep apnoea                                        | sleep disorders        | 7263971000006116 | Idiopathic hypersomnia with long sleep time            | sleep disorders |
| 2939251000006112 | Central sleep apnoea syndrome                               | sleep disorders        | 1772831000006116 | Idiopathic hypersomnia without long sleep time         | sleep disorders |
| 299001000000116  | Chronic obstructive pulmonary disease disturbs sleep        | sleep disorders        | 2562371000006117 | Idiopathic insomnia                                    | sleep disorders |
| 3732591000006114 | Chronic sleeping sickness                                   | sleep disorders        | 98133013         | Initial insomnia                                       | sleep disorders |
|                  |                                                             |                        | 960621000006117  | Insomnia                                               | sleep disorders |
|                  |                                                             |                        | 345377013        | Insomnia NOS                                           | sleep disorders |
|                  |                                                             |                        | 772561000006111  | Insomnia due to nonorganic sleep disorder              | sleep disorders |



|                  |                                                         |                 |                   |                                                                          |                 |
|------------------|---------------------------------------------------------|-----------------|-------------------|--------------------------------------------------------------------------|-----------------|
| 3176551000006111 | Insomnia with sleep apnea                               | sleep disorders | 295412011         | Persistent insomnia                                                      | sleep disorders |
| 960641000006112  | Insufficient sleep/rest for age/physical condition      | sleep disorders | 3887451000006112  | Poisoning by sleeping drug                                               | sleep disorders |
| 3593431000006112 | Interrupted sleep                                       | sleep disorders | 3887461000006114  | Poisoning by sleeping pill                                               | sleep disorders |
| 295430016        | Inversion of sleep rhythm                               | sleep disorders | 3887471000006119  | Poisoning caused by sleeping drug                                        | sleep disorders |
| 252935019        | Late insomnia                                           | sleep disorders | 3887491000006118  | Poisoning caused by sleeping pill                                        | sleep disorders |
| 49145012         | Light sleep                                             | sleep disorders | 3887481000006116  | Poisoning caused by sleeping tablet                                      | sleep disorders |
| 305092019        | Menopausal sleeplessness                                | sleep disorders | 5892471000006112  | Poor sleep                                                               | sleep disorders |
| 111701012        | Middle insomnia                                         | sleep disorders | 459355013         | Poor sleep pattern                                                       | sleep disorders |
| 100304016        | Narcolepsy                                              | sleep disorders | 1772811000006110  | Primary hypersomnia                                                      | sleep disorders |
| 3480591000006112 | Narcoleptic syndrome                                    | sleep disorders | 1806231000006114  | Primary insomnia                                                         | sleep disorders |
| 675161000006119  | Nightmares                                              | sleep disorders | 1806271000006112  | Psycho-education - sleep                                                 | sleep disorders |
| 252939013        | Nightmares - symptom                                    | sleep disorders | 6872511000006113  | REM sleep behavior disorder                                              | sleep disorders |
| 5506811000006116 | Non-organic disorder of the sleep-wake schedule         | sleep disorders | 1772851000006111  | REM sleep behaviour disorder                                             | sleep disorders |
| 295435014        | Non-organic sleep disorder NOS                          | sleep disorders | 6872521000006117  | REM sleep disorder                                                       | sleep disorders |
| 223701000000114  | Non-organic sleep disorders                             | sleep disorders | 6872531000006119  | Rapid eye movement sleep behavior disorder                               | sleep disorders |
| 3773281000006119 | OSA - Obstructive sleep apnea                           | sleep disorders | 6872541000006112  | Rapid eye movement sleep behaviour disorder                              | sleep disorders |
| 3773271000006117 | OSA - Obstructive sleep apnoea                          | sleep disorders | 1856301000006117  | Rcp difficulty sleeping                                                  | sleep disorders |
| 3773291000006116 | Obstructive sleep apnea                                 | sleep disorders | 1777001000006116  | Reason for referral: Sleep Problems                                      | sleep disorders |
| 3773261000006112 | Obstructive sleep apnea syndrome                        | sleep disorders | 11639631000006119 | Recommendation to use digital cognitive behavioural therapy for insomnia | sleep disorders |
| 267911000006119  | Obstructive sleep apnoea                                | sleep disorders | 1951091000006113  | Referral to rough sleeper outreach team                                  | sleep disorders |
| 219501000000111  | Obstructive sleep apnoea                                | sleep disorders | 634561000000115   | Referral to sleep clinic                                                 | sleep disorders |
| 3773251000006110 | Obstructive sleep apnoea syndrome                       | sleep disorders | 295422017         | Repeated rapid eye movement sleep interruptions                          | sleep disorders |
| 2287351000000110 | On melatonin for sleep disorder                         | sleep disorders | 401807010         | Repetitive intrusions of sleep                                           | sleep disorders |
| 401808017        | Other non-organic sleep disorder                        | sleep disorders | 5506631000006111  | Repetitive sleep intrusions                                              | sleep disorders |
| 295423010        | Other sleep stage or arousal dysfunction                | sleep disorders | 54936019          | Restless legs syndrome                                                   | sleep disorders |
| 1820971000006110 | PCL-C - Trouble falling or staying asleep: A little bit | sleep disorders | 21110011          | Restless sleep                                                           | sleep disorders |
| 1821001000006112 | PCL-C - Trouble falling or staying asleep: Extremely    | sleep disorders | 4766561000006111  | Reversed sleep-wake cycle                                                | sleep disorders |
| 1820981000006113 | PCL-C - Trouble falling or staying asleep: Moderately   | sleep disorders | 3693971000006113  | SAS - Sleep apnea syndrome                                               | sleep disorders |
| 1820991000006111 | PCL-C - Trouble falling or staying asleep: Quite a bit  | sleep disorders | 3694001000006117  | SAS - Sleep apnoea syndrome                                              | sleep disorders |
| 3453391000006116 | Parasomnia (sleep disorder)                             | sleep disorders | 2694806018        | Seen in sleep clinic                                                     | sleep disorders |
| 3480571000006111 | Paroxysmal sleep                                        | sleep disorders | 981761000006114   | Sleep apnea                                                              | sleep disorders |
| 1772781000006113 | Periodic leg movements of sleep                         | sleep disorders | 3693961000006118  | Sleep apnea                                                              | sleep disorders |
| 295416014        | Persistent hypersomnia                                  | sleep disorders | 3847221000006110  | Sleep apnea monitoring with alarm                                        | sleep disorders |

|                   |                                    |                 |                  |                                                      |                 |
|-------------------|------------------------------------|-----------------|------------------|------------------------------------------------------|-----------------|
| 3693991000006114  | Sleep apnea syndrome               | sleep disorders | 2695291000006112 | Tossing and turning during sleep                     | sleep disorders |
| 200354014         | Sleep apnoea                       | sleep disorders | 401806018        | Transient hypersomnia                                | sleep disorders |
| 136581000006114   | Sleep apnoea                       | sleep disorders | 401805019        | Transient insomnia                                   | sleep disorders |
| 3847211000006119  | Sleep apnoea monitoring with alarm | sleep disorders | 295408017        | Unspecified non-organic sleep disorder               | sleep disorders |
| 11989401000006115 | Sleep apnoea syndrome              | sleep disorders | 317048011        | [D]Hypersomnia NOS                                   | sleep disorders |
| 12702791000006116 | Sleep apnoea syndrome              | sleep disorders | 405691012        | [D]Hypersomnia with sleep apnoea                     | sleep disorders |
| 136601000006116   | Sleep disorders                    | sleep disorders | 1222474014       | [D]Insomnia - symptom                                | sleep disorders |
| 643141000000111   | Sleep hygiene behaviour education  | sleep disorders | 317035012        | [D]Insomnia NOS                                      | sleep disorders |
| 3693981000006111  | Sleep hypopnea                     | sleep disorders | 317034011        | [D]Insomnia with sleep apnoea                        | sleep disorders |
| 3694011000006119  | Sleep hypopnoea                    | sleep disorders | 457106016        | [D]Sleep apnoea syndrome                             | sleep disorders |
| 1488768014        | Sleep management                   | sleep disorders | 317032010        | [D]Sleep disturbance, unspecified                    | sleep disorders |
| 1772791000006111  | Sleep paralysis                    | sleep disorders | 317031015        | [D]Sleep disturbances                                | sleep disorders |
| 6649641000006111  | Sleep pattern                      | sleep disorders | 317054012        | [D]Sleep dysfunction NOS                             | sleep disorders |
| 3211751000006118  | Sleep problem                      | sleep disorders | 317053018        | [D]Sleep dysfunction with arousal disturbance        | sleep disorders |
| 7282631000006117  | Sleep related hypoventilation      | sleep disorders | 317052011        | [D]Sleep dysfunction with sleep stage disturbance    | sleep disorders |
| 4766571000006116  | Sleep rhythm inversion             | sleep disorders | 317049015        | [D]Sleep rhythm inversion                            | sleep disorders |
| 2558691000006117  | Sleep rhythm problem               | sleep disorders | 317050015        | [D]Sleep rhythm irregular                            | sleep disorders |
| 3957671000006117  | Sleep terror disorder              | sleep disorders | 1222473015       | [D]Sleep rhythm problems                             | sleep disorders |
| 3957681000006119  | Sleep terrors                      | sleep disorders | 317051016        | [D]Sleep-wake rhythm non-24-hour cycle               | sleep disorders |
| 3809191000006116  | Sleep walking                      | sleep disorders | 303181000006112  | [D]Syndrome sleep apnoea                             | sleep disorders |
| 3809171000006117  | Sleep walking disorder             | sleep disorders | 460422010        | [V]Personal history of unhealthy sleep-wake schedule | sleep disorders |
| 5008031000006115  | Sleep-related epilepsy             | sleep disorders | 357711000006119  | [X] Adverse reaction to sleeping pill NOS            | sleep disorders |
| 345396012         | Sleep-related respiratory failure  | sleep disorders | 334363016        | [X]Accidental poisoning with sleeping tablets        | sleep disorders |
| 2558671000006118  | Sleep-wake schedule disorder       | sleep disorders | 379691000006110  | [X]Emotional sleep disorder NOS                      | sleep disorders |
| 5529331000006119  | Sleepiness                         | sleep disorders | 399991000006114  | [X]Nightmares                                        | sleep disorders |
| 841611000006119   | Sleeping Pattern                   | sleep disorders | 400071000006111  | [X]Nonorganic disorder of the sleep-wake schedule    | sleep disorders |
| 503961011         | Sleeping sickness                  | sleep disorders | 400111000006115  | [X]Nonorganic hypersomnia                            | sleep disorders |
| 2932791000006119  | Sleeping sickness                  | sleep disorders | 400121000006111  | [X]Nonorganic insomnia                               | sleep disorders |
| 4771851000006111  | Sleeplessness                      | sleep disorders | 296396019        | [X]Nonorganic sleep disorder, unspecified            | sleep disorders |
| 3764061000006111  | Sleeps too much                    | sleep disorders | 400141000006116  | [X]Nonorganic sleep disorders                        | sleep disorders |
| 960611000006113   | Sleepwalking                       | sleep disorders | 296394016        | [X]Other nonorganic sleep disorders                  | sleep disorders |
| 3809201000006118  | Sleepwalking disorder              | sleep disorders | 299344018        | [X]Other sleep disorders                             | sleep disorders |
| 5529361000006111  | Sleepy                             | sleep disorders |                  |                                                      |                 |
| 139641000006114   | Somnambulism - sleep walking       | sleep disorders |                  |                                                      |                 |
| 5529351000006114  | Somnolence (sleepiness)            | sleep disorders |                  |                                                      |                 |
| 2695301000006113  | Tosses and turns in sleep          | sleep disorders |                  |                                                      |                 |

|                  |                                                          |                  |                 |                                                        |                  |
|------------------|----------------------------------------------------------|------------------|-----------------|--------------------------------------------------------|------------------|
| 334643017        | [X]Overdose - sleeping tabs                              | sleep disorders  | 83834016        | Alcoholic fatty liver                                  | substance misuse |
| 424021000006111  | [X]Psychogenic inversion of circadian rhythm             | sleep disorders  | 353594015       | Alcoholic fibrosis and sclerosis of liver              | substance misuse |
| 424041000006116  | [X]Psychogenic inversion of sleep rhythm                 | sleep disorders  | 4525015         | Alcoholic gastritis                                    | substance misuse |
| 427011000006112  | [X]Sleep terrors                                         | sleep disorders  | 353595019       | Alcoholic hepatic failure                              | substance misuse |
| 427021000006116  | [X]Sleepwalking                                          | sleep disorders  | 353587018       | Alcoholic hepatitis                                    | substance misuse |
| 17390014         | Acute alcoholic hepatitis                                | substance misuse | 303399018       | Alcoholic liver damage unspecified                     | substance misuse |
| 295127018        | Acute alcoholic intoxication in alcoholism               | substance misuse | 476701000006114 | Alcoholic myopathy                                     | substance misuse |
| 295132017        | Acute alcoholic intoxication in alcoholism NOS           | substance misuse | 294672019       | Alcoholic paranoia                                     | substance misuse |
| 295131012        | Acute alcoholic intoxication in remission, in alcoholism | substance misuse | 14103017        | Alcoholic polyneuropathy                               | substance misuse |
| 295128011        | Acute alcoholic intoxication, unspecified, in alcoholism | substance misuse | 476741000006111 | Alcoholic psychoses                                    | substance misuse |
| 1550291000000111 | Admission to substance misuse detoxification centre      | substance misuse | 294676016       | Alcoholic psychosis NOS                                | substance misuse |
| 405461000000114  | Alcohol abuse monitoring                                 | substance misuse | 251195015       | Alcoholics anonymous                                   | substance misuse |
| 476361000006114  | Alcohol amnestic syndrome                                | substance misuse | 12878014        | Alcoholism                                             | substance misuse |
| 294664016        | Alcohol amnestic syndrome NOS                            | substance misuse | 2475575018      | Amphetamine or psychostimulant dependence NOS          | substance misuse |
| 500478011        | Alcohol dependence syndrome                              | substance misuse | 2475571010      | Amphetamine or psychostimulant dependence, unspecified | substance misuse |
| 295144019        | Alcohol dependence syndrome NOS                          | substance misuse | 2478714011      | Amphetamine poisoning                                  | substance misuse |
| 295126010        | Alcohol dependence with acute alcoholic intoxication     | substance misuse | 401794015       | Amphetamine or other psychostimulant dependence        | substance misuse |
| 106878015        | Alcohol detoxification                                   | substance misuse | 295201013       | Amphetamine or psychostimulant dependence NOS          | substance misuse |
| 2474678017       | Alcohol disorder monitoring                              | substance misuse | 295200014       | Amphetamine or psychostimulant dependence in remission | substance misuse |
| 2549849017       | Alcohol induced hallucinations                           | substance misuse | 295198015       | Amphetamine or psychostimulant dependence, continuous  | substance misuse |
| 606991000000117  | Alcohol misuse                                           | substance misuse | 295199011       | Amphetamine or psychostimulant dependence, episodic    | substance misuse |
| 15243013         | Alcohol withdrawal delirium                              | substance misuse | 295197013       | Amphetamine or psychostimulant dependence, unspecified | substance misuse |
| 294669014        | Alcohol withdrawal hallucinosis                          | substance misuse | 1230261015      | Amphetamine poisoning                                  | substance misuse |
| 294674018        | Alcohol withdrawal syndrome                              | substance misuse | 283451018       | Aversion therapy - alcoholism                          | substance misuse |
| 353698013        | Alcohol-induced chronic pancreatitis                     | substance misuse | 346942012       | Benzodiazepine dependence                              | substance misuse |
| 478024019        | Alcohol-induced epilepsy                                 | substance misuse | 342366014       | Binge drinker                                          | substance misuse |
| 356292013        | Alcohol-induced pseudo-Cushing's syndrome                | substance misuse | 295190010       | Cannabis dependence in remission                       | substance misuse |
| 138527014        | Alcoholic cardiomyopathy                                 | substance misuse | 295188014       | Cannabis dependence, continuous                        | substance misuse |
| 476611000006116  | Alcoholic cirrhosis of liver                             | substance misuse |                 |                                                        |                  |
| 346929012        | Alcoholic dementia NOS                                   | substance misuse |                 |                                                        |                  |
| 297011014        | Alcoholic encephalopathy                                 | substance misuse |                 |                                                        |                  |

|                 |                                                         |                  |                  |                                                         |                  |
|-----------------|---------------------------------------------------------|------------------|------------------|---------------------------------------------------------|------------------|
| 295189018       | Cannabis dependence, episodic                           | substance misuse |                  | dependence, episodic                                    |                  |
| 295187016       | Cannabis dependence, unspecified                        | substance misuse | 295229011        | Combined opioid with other drug dependence, unspecified | substance misuse |
| 295191014       | Cannabis drug dependence NOS                            | substance misuse | 295129015        | Continuous acute alcoholic intoxication in alcoholism   | substance misuse |
| 401793014       | Cannabis type drug dependence                           | substance misuse | 295139014        | Continuous chronic alcoholism                           | substance misuse |
| 478046010       | Cerebellar ataxia due to alcoholism                     | substance misuse | 295154015        | Continuous opioid dependence                            | substance misuse |
| 542611000006114 | Cerebral degeneration due to alcoholism                 | substance misuse | 2548235012       | Current drug user                                       | substance misuse |
| 342446016       | Chases the dragon                                       | substance misuse | 2537051014       | DNA - Did not attend substance misuse clinic            | substance misuse |
| 294668018       | Chronic alcoholic brain syndrome                        | substance misuse | 371501000000110  | Delivery of rehabilitation for alcohol addiction        | substance misuse |
| 451124014       | Chronic alcoholic hepatitis                             | substance misuse | 371621000000117  | Delivery of rehabilitation for drug addiction           | substance misuse |
| 110629012       | Chronic alcoholism                                      | substance misuse | 512661000000111  | Does not use heroin on top of substitution therapy      | substance misuse |
| 295143013       | Chronic alcoholism NOS                                  | substance misuse | 405581000000116  | Drug abuse monitoring                                   | substance misuse |
| 295142015       | Chronic alcoholism in remission                         | substance misuse | 342438017        | Drug addict                                             | substance misuse |
| 295176012       | Cocaine dependence, continuous                          | substance misuse | 630051000006114  | Drug addict notific admin                               | substance misuse |
| 295177015       | Cocaine dependence, episodic                            | substance misuse | 630061000006111  | Drug addict notific to CMO                              | substance misuse |
| 295173016       | Cocaine dependence, unspecified                         | substance misuse | 21261000000113   | Drug addict re-notif to CMO                             | substance misuse |
| 295179017       | Cocaine drug dependence NOS                             | substance misuse | 285115018        | Drug addict re-notific due                              | substance misuse |
| 571351000006110 | Cocaine poisoning                                       | substance misuse | 295146017        | Drug addiction                                          | substance misuse |
| 295172014       | Cocaine type drug dependence                            | substance misuse | 316931000000112  | Drug addiction detoxification therapy - buprenorphine   | substance misuse |
| 295239017       | Combined drug dependence, excluding opioid, NOS         | substance misuse | 302981000000113  | Drug addiction detoxification therapy - methadone       | substance misuse |
| 295236012       | Combined drug dependence, excluding opioid, continuous  | substance misuse | 316901000000118  | Drug addiction maintenance therapy - buprenorphine      | substance misuse |
| 295237015       | Combined drug dependence, excluding opioid, episodic    | substance misuse | 303011000000111  | Drug addiction maintenance therapy - methadone          | substance misuse |
| 295235011       | Combined drug dependence, excluding opioid, unspecified | substance misuse | 285119012        | Drug addiction notif NOS                                | substance misuse |
| 295234010       | Combined drug dependence, excluding opioids             | substance misuse | 405031011        | Drug addiction notification                             | substance misuse |
| 295228015       | Combined opioid with other drug dependence              | substance misuse | 1676621000006110 | Drug addiction notification local SMR22                 | substance misuse |
| 295233016       | Combined opioid with other drug dependence NOS          | substance misuse | 397153012        | Drug addiction therapy                                  | substance misuse |
| 295230018       | Combined opioid with other drug dependence, continuous  | substance misuse | 630131000006118  | Drug addictn therap-methadone                           | substance misuse |
| 295231019       | Combined opioid with other drug                         | substance misuse | 295145018        | Drug dependence                                         | substance misuse |
|                 |                                                         |                  | 295241016        | Drug dependence NOS                                     | substance misuse |
|                 |                                                         |                  | 306144010        | Drug dependence during pregnancy - baby delivered       | substance misuse |

|                  |                                                              |                  |                  |                                         |                  |
|------------------|--------------------------------------------------------------|------------------|------------------|-----------------------------------------|------------------|
| 306146012        | Drug dependence during pregnancy - baby not yet delivered    | substance misuse | 295216011        | Glue sniffing dependence, episodic      | substance misuse |
| 630311000006110  | Drug dependence during pregnancy/childbirth/ puerperium NOS  | substance misuse | 295214014        | Glue sniffing dependence, unspecified   | substance misuse |
| 2533722018       | Drug dependence home detoxification                          | substance misuse | 512241000000113  | H/O daily heroin misuse                 | substance misuse |
| 2533733015       | Drug dependence home detoxification contraindicated          | substance misuse | 512421000000117  | H/O daily opiate misuse                 | substance misuse |
| 630321000006119  | Drug dependence in pregnancy, childbirth and the puerperium  | substance misuse | 512601000000112  | H/O daily solvent misuse                | substance misuse |
| 2533721013       | Drug dependence self detoxification                          | substance misuse | 512631000000118  | H/O heroin misuse                       | substance misuse |
| 630361000006113  | Drug dependence therapy                                      | substance misuse | 512351000000115  | H/O infrequent amphetamine misuse       | substance misuse |
| 237641000000113  | Drug misuse - enhanced service completed                     | substance misuse | 512471000000118  | H/O infrequent cocaine misuse           | substance misuse |
| 235741000000110  | Drug misuse - enhanced services administration               | substance misuse | 512501000000113  | H/O infrequent crack cocaine misuse     | substance misuse |
| 1680621000006115 | Drug misuse assessment declined - enhanced services administ | substance misuse | 512261000000114  | H/O infrequent heroin misuse            | substance misuse |
| 2246691000000115 | Drug misuse clinic administration                            | substance misuse | 512441000000112  | H/O infrequent opiate misuse            | substance misuse |
| 1153431000000110 | Drug misuse treatment in primary care                        | substance misuse | 512621000000115  | H/O infrequent solvent misuse           | substance misuse |
| 1704471000006116 | Drug misuse treatment primary care - enhanced services admin | substance misuse | 2418861000000117 | H/O novel psychoactive substance misuse | substance misuse |
| 630831000006113  | Drug psychoses                                               | substance misuse | 512201000000110  | H/O opiate misuse                       | substance misuse |
| 294693016        | Drug psychosis NOS                                           | substance misuse | 512171000000114  | H/O solvent misuse                      | substance misuse |
| 631001000006115  | Drug user                                                    | substance misuse | 512341000000118  | H/O weekly amphetamine misuse           | substance misuse |
| 294691019        | Drug-induced personality disorder                            | substance misuse | 512461000000113  | H/O weekly cocaine misuse               | substance misuse |
| 342520017        | Drug-related offending behaviour                             | substance misuse | 512491000000119  | H/O weekly crack cocaine misuse         | substance misuse |
| 324297018        | Ecstasy poisoning                                            | substance misuse | 512251000000111  | H/O weekly heroin misuse                | substance misuse |
| 295240015        | Ecstasy type drug dependence                                 | substance misuse | 512431000000115  | H/O weekly opiate misuse                | substance misuse |
| 295130013        | Episodic acute alcoholic intoxication in alcoholism          | substance misuse | 512611000000114  | H/O weekly solvent misuse               | substance misuse |
| 295141010        | Episodic chronic alcoholism                                  | substance misuse | 251626014        | H/O: alcoholism                         | substance misuse |
| 295155019        | Episodic opioid dependence                                   | substance misuse | 2476701016       | H/O: drug abuse                         | substance misuse |
| 249855011        | FH: Drug dependency                                          | substance misuse | 251627017        | H/O: drug dependency                    | substance misuse |
| 1485129010       | Failed heroin detoxification                                 | substance misuse | 64025010         | Hallucinogen dependence                 | substance misuse |
| 2533651012       | Follow up substance misuse assessment                        | substance misuse | 295211018        | Hallucinogen dependence NOS             | substance misuse |
| 295212013        | Glue sniffing dependence                                     | substance misuse | 295208019        | Hallucinogen dependence, continuous     | substance misuse |
| 295218012        | Glue sniffing dependence NOS                                 | substance misuse | 295209010        | Hallucinogen dependence, episodic       | substance misuse |
| 295215010        | Glue sniffing dependence, continuous                         | substance misuse | 295207012        | Hallucinogen dependence, unspecified    | substance misuse |
|                  |                                                              |                  | 299081000000114  | Harmful alcohol use                     | substance misuse |
|                  |                                                              |                  | 817251000006118  | Hashish dependence                      | substance misuse |
|                  |                                                              |                  | 299061000000117  | Hazardous alcohol use                   | substance misuse |

|                  |                                                         |                  |                 |                                                             |                  |
|------------------|---------------------------------------------------------|------------------|-----------------|-------------------------------------------------------------|------------------|
| 757341000000110  | Health problem secondary to drug misuse                 | substance misuse |                 | psychostimulant abuse                                       |                  |
| 346947018        | Heroin dependence                                       | substance misuse | 295314011       | Nondependent amphetamine or psychostimulant abuse NOS       | substance misuse |
| 309921000000119  | Heroin misuse                                           | substance misuse | 295312010       | Nondependent amphetamine or psychostimulant abuse, episodic | substance misuse |
| 1220925010       | Heroin poisoning                                        | substance misuse | 586641000006118 | Nondependent amphetamine/psychostimulant abuse in remission | substance misuse |
| 497451000000119  | History of substance misuse                             | substance misuse | 586651000006116 | Nondependent amphetamine/psychostimulant abuse, continuous  | substance misuse |
| 295169019        | Hypnotic or anxiolytic dependence, episodic             | substance misuse | 586661000006119 | Nondependent amphetamine/psychostimulant abuse, unspecified | substance misuse |
| 2301851000000116 | In-house substance misuse treatment                     | substance misuse | 586671000006114 | Nondependent antidepressant type drug abuse                 | substance misuse |
| 2533642016       | Initial substance misuse assessment                     | substance misuse | 295321011       | Nondependent antidepressant type drug abuse NOS             | substance misuse |
| 339576014        | Injecting drug user                                     | substance misuse | 295261010       | Nondependent cannabis abuse                                 | substance misuse |
| 342455018        | Injects drugs subcutaneously                            | substance misuse | 295266017       | Nondependent cannabis abuse NOS                             | substance misuse |
| 769451000006111  | Intoxication - alcohol                                  | substance misuse | 295263013       | Nondependent cannabis abuse, continuous                     | substance misuse |
| 342465012        | Intravenous drug user                                   | substance misuse | 295264019       | Nondependent cannabis abuse, episodic                       | substance misuse |
| 753331000006118  | Korsakov's alcoholic psychosis                          | substance misuse | 295262015       | Nondependent cannabis abuse, unspecified                    | substance misuse |
| 294662017        | Korsakov's alcoholic psychosis with peripheral neuritis | substance misuse | 295299015       | Nondependent cocaine abuse                                  | substance misuse |
| 346936013        | LSD dependence                                          | substance misuse | 295305018       | Nondependent cocaine abuse NOS                              | substance misuse |
| 369851012        | LSD reaction                                            | substance misuse | 295303013       | Nondependent cocaine abuse in remission                     | substance misuse |
| 342434015        | Long-term drug misuser                                  | substance misuse | 295301010       | Nondependent cocaine abuse, continuous                      | substance misuse |
| 346935012        | Lysergic acid diethylamide dependence                   | substance misuse | 295302015       | Nondependent cocaine abuse, episodic                        | substance misuse |
| 718011000006110  | Marihuana dependence                                    | substance misuse | 295300011       | Nondependent cocaine abuse, unspecified                     | substance misuse |
| 346949015        | Methadone dependence                                    | substance misuse | 401798017       | Nondependent hallucinogen abuse                             | substance misuse |
| 295327010        | Misuse of prescription only drugs                       | substance misuse | 295276019       | Nondependent hallucinogen abuse NOS                         | substance misuse |
| 342441014        | Misuses drugs orally                                    | substance misuse | 295275015       | Nondependent hallucinogen abuse in remission                | substance misuse |
| 1230527016       | Morphine poisoning                                      | substance misuse | 295272017       | Nondependent hallucinogen abuse, continuous                 | substance misuse |
| 500344018        | Nondependent abuse of drugs                             | substance misuse | 295274016       | Nondependent hallucinogen abuse, episodic                   | substance misuse |
| 401797010        | Nondependent alcohol abuse                              | substance misuse |                 |                                                             |                  |
| 295255012        | Nondependent alcohol abuse NOS                          | substance misuse |                 |                                                             |                  |
| 295254011        | Nondependent alcohol abuse in remission                 | substance misuse |                 |                                                             |                  |
| 295252010        | Nondependent alcohol abuse, continuous                  | substance misuse |                 |                                                             |                  |
| 295253017        | Nondependent alcohol abuse, episodic                    | substance misuse |                 |                                                             |                  |
| 295251015        | Nondependent alcohol abuse, unspecified                 | substance misuse |                 |                                                             |                  |
| 401800012        | Nondependent amphetamine or other                       | substance misuse |                 |                                                             |                  |

|                  |                                                         |                  |                  |                                                             |                  |
|------------------|---------------------------------------------------------|------------------|------------------|-------------------------------------------------------------|------------------|
| 295271012        | Nondependent hallucinogen abuse, unspecified            | substance misuse | 346951016        | Opium dependence                                            | substance misuse |
| 295322016        | Nondependent mixed drug abuse                           | substance misuse | 401760017        | Other alcoholic dementia                                    | substance misuse |
| 295328017        | Nondependent mixed drug abuse NOS                       | substance misuse | 294673012        | Other alcoholic psychosis                                   | substance misuse |
| 295326018        | Nondependent mixed drug abuse in remission              | substance misuse | 294686015        | Other drug psychoses                                        | substance misuse |
| 295324015        | Nondependent mixed drug abuse, continuous               | substance misuse | 294692014        | Other drug psychoses NOS                                    | substance misuse |
| 295325019        | Nondependent mixed drug abuse, episodic                 | substance misuse | 401796018        | Other specified drug dependence                             | substance misuse |
| 295323014        | Nondependent mixed drug abuse, unspecified              | substance misuse | 295227013        | Other specified drug dependence NOS                         | substance misuse |
| 295290016        | Nondependent opioid abuse                               | substance misuse | 295224018        | Other specified drug dependence, continuous                 | substance misuse |
| 295298011        | Nondependent opioid abuse NOS                           | substance misuse | 295225017        | Other specified drug dependence, episodic                   | substance misuse |
| 295297018        | Nondependent opioid abuse in remission                  | substance misuse | 295222019        | Other specified drug dependence, unspecified                | substance misuse |
| 295295014        | Nondependent opioid abuse, continuous                   | substance misuse | 294671014        | Pathological alcohol intoxication                           | substance misuse |
| 295296010        | Nondependent opioid abuse, episodic                     | substance misuse | 2548434014       | Persistent substance misuse                                 | substance misuse |
| 295293019        | Nondependent opioid abuse, unspecified                  | substance misuse | 1153411000000119 | Pharmacy attended for drug misuse                           | substance misuse |
| 401801011        | Nondependent other drug abuse                           | substance misuse | 1714461000006113 | Pharmacy attended for drug misuse - enhanced services admin | substance misuse |
| 295339019        | Nondependent other drug abuse NOS                       | substance misuse | 342435019        | Poly-drug misuser                                           | substance misuse |
| 295338010        | Nondependent other drug abuse in remission              | substance misuse | 355550012        | Pregnancy and drug dependence                               | substance misuse |
| 295336014        | Nondependent other drug abuse, continuous               | substance misuse | 2548950012       | Preoccupied with substance misuse                           | substance misuse |
| 295337017        | Nondependent other drug abuse, episodic                 | substance misuse | 476311000000116  | Previous history of amphetamine misuse                      | substance misuse |
| 295335013        | Nondependent other drug abuse, unspecified              | substance misuse | 477271000000118  | Previous history of cocaine misuse                          | substance misuse |
| 342439013        | Notified addict                                         | substance misuse | 477511000000114  | Previous history of crack cocaine misuse                    | substance misuse |
| 2371251000000114 | Novel psychoactive substance misuse                     | substance misuse | 475531000000111  | Previous history of heroin misuse                           | substance misuse |
| 254306016        | O/E - alcoholic breath                                  | substance misuse | 477031000000112  | Previous history of opiate misuse                           | substance misuse |
| 453265010        | Oesophageal varices in alcoholic cirrhosis of the liver | substance misuse | 478471000000116  | Previous history of solvent misuse                          | substance misuse |
| 309021000000115  | On substance misuse programme                           | substance misuse | 2548750019       | Prolonged high dose use of cannabis                         | substance misuse |
| 1495571019       | Opiate and narcotic poisoning                           | substance misuse | 199931000006119  | Psychostimulant abuse                                       | substance misuse |
| 19399016         | Opiate poisoning                                        | substance misuse | 411458014        | Psychostimulant dependence                                  | substance misuse |
| 541451000000111  | Opioid agonist substitution therapy                     | substance misuse | 1926131000006117 | Refer to MH services deferred until alcohol misuse resolved | substance misuse |
| 541541000000112  | Opioid antagonist therapy                               | substance misuse | 1484890014       | Referral to community alcohol team                          | substance misuse |
| 295157010        | Opioid drug dependence NOS                              | substance misuse | 1746481000000112 | Referral to community alcohol team declined                 | substance misuse |
| 44291000006113   | Opioid type drug dependence                             | substance misuse | 2549646014       | Referral to community drug and alcohol team                 | substance misuse |

|                  |                                                                    |                  |                 |                                                     |                  |
|------------------|--------------------------------------------------------------------|------------------|-----------------|-----------------------------------------------------|------------------|
| 189631000000117  | Referral to community drug dependency team                         | substance misuse | 117761000006116 | Suspect alcohol abuse - denied                      | substance misuse |
| 1780455014       | Referral to drug abuse counsellor                                  | substance misuse | 253490011       | Suspected abuse hard drugs                          | substance misuse |
| 494891000000118  | Referral to drugs therapist                                        | substance misuse | 253489019       | Suspected abuse soft drugs                          | substance misuse |
| 622961000000116  | Referral to specialist alcohol treatment service                   | substance misuse | 253488010       | Suspected drug abuse                                | substance misuse |
| 540591000000111  | Referral to substance misuse service                               | substance misuse | 295136019       | Unspecified chronic alcoholism                      | substance misuse |
| 495611000000112  | Reinduction to methadone maintenance therapy                       | substance misuse | 295153014       | Unspecified opioid dependence                       | substance misuse |
| 2264491000000115 | Seen in drug misuse clinic                                         | substance misuse | 512651000000113 | Uses heroin on top of substitution therapy          | substance misuse |
| 1063801000000119 | Seen in substance misuse clinic                                    | substance misuse | 501294012       | Wernicke-Korsakov syndrome                          | substance misuse |
| 540681000000110  | Self referral to substance misuse service                          | substance misuse | 317676016       | [D]Finding of psychotropic drug in blood            | substance misuse |
| 1153451000000115 | Shared care drug misuse treatment                                  | substance misuse | 461112017       | [V]Alcohol abuse counselling and surveillance       | substance misuse |
| 1704461000006111 | Shared care drug misuse treatment - enhanced services admin        | substance misuse | 461113010       | [V]Drug abuse counselling and surveillance          | substance misuse |
| 342475010        | Shares drug equipment                                              | substance misuse | 460276013       | [V]Personal history of alcoholism                   | substance misuse |
| 342444018        | Smokes drugs in cigarette form                                     | substance misuse | 2474734017      | [V]Personal history of drug abuse by injection      | substance misuse |
| 342445017        | Smokes drugs through a pipe                                        | substance misuse | 460277016       | [V]Personal history of psychoactive substance abuse | substance misuse |
| 342447013        | Sniffs drugs                                                       | substance misuse | 361941000006116 | [X]Accidental poisoning with heroin                 | substance misuse |
| 127611000006118  | Stimulant abuse                                                    | substance misuse | 362921000006118 | [X]Alcohol addiction                                | substance misuse |
| 127621000006114  | Stimulant dependence                                               | substance misuse | 315091000000117 | [X]Alcohol withdrawal-induced seizure               | substance misuse |
| 1627491000006112 | Substance misuse                                                   | substance misuse | 362941000006113 | [X]Alcoholic dementia NOS                           | substance misuse |
| 2533726015       | Substance misuse clinical management plan agreed                   | substance misuse | 362951000006110 | [X]Alcoholic hallucinosis                           | substance misuse |
| 300081000000111  | Substance misuse clinical management plan reviewed                 | substance misuse | 362961000006112 | [X]Alcoholic jealousy                               | substance misuse |
| 305121000000119  | Substance misuse management stopped - self withdrawal              | substance misuse | 362971000006117 | [X]Alcoholic paranoia                               | substance misuse |
| 2533634017       | Substance misuse monitoring                                        | substance misuse | 362981000006119 | [X]Alcoholic psychosis NOS                          | substance misuse |
| 2307771000000112 | Substance misuse monitoring 6 month review                         | substance misuse | 370961000006119 | [X]Chronic alcoholic brain syndrome                 | substance misuse |
| 531051000000115  | Substance misuse structured counselling                            | substance misuse | 370971000006114 | [X]Chronic alcoholism                               | substance misuse |
| 530931000000116  | Substance misuse treatment declined                                | substance misuse | 371181000006118 | [X]Cold turkey, opiate withdrawal                   | substance misuse |
| 305731000000118  | Substance misuse treatment programme completed                     | substance misuse | 376451000006113 | [X]Delirium tremens, alcohol induced                | substance misuse |
| 305701000000112  | Substance misuse treatment withdrawn                               | substance misuse | 379251000006119 | [X]Drug addiction - cannabis                        | substance misuse |
| 1907701000006117 | Substance misuse treatment programme del other healthcare provider | substance misuse | 379261000006117 | [X]Drug addiction - cocaine                         | substance misuse |
|                  |                                                                    |                  | 379271000006112 | [X]Drug addiction - hallucinogen                    | substance misuse |
|                  |                                                                    |                  | 379281000006110 | [X]Drug addiction - opioids                         | substance misuse |
|                  |                                                                    |                  | 295213015       | [X]Drug addiction - solvent                         | substance misuse |
|                  |                                                                    |                  | 379301000006114 | [X]Drug addiction NOS                               | substance misuse |
|                  |                                                                    |                  | 379311000006112 | [X]Drug addiction - sedative / hypnotics            | substance misuse |



|                 |                                                                          |                     |                 |                                                                       |                     |
|-----------------|--------------------------------------------------------------------------|---------------------|-----------------|-----------------------------------------------------------------------|---------------------|
| 379321000006116 | [X]Drug addiction-<br>other stimul                                       | substance<br>misuse |                 |                                                                       |                     |
| 380031000006116 | [X]Evid of alcohol<br>involv determind by<br>level of intoxication       | substance<br>misuse | 397501000006119 | [X]Ment/behav dis<br>due use<br>cannabinoids: unsp<br>ment/behav disd | substance<br>misuse |
| 388831000006113 | [X]Heroin addiction                                                      | substance<br>misuse | 397511000006116 | [X]Ment/behav dis<br>due use<br>hallucinogens: unsp<br>ment/behav dis | substance<br>misuse |
| 394681000006119 | [X]Korsakov's<br>psychosis, alcohol<br>induced                           | substance<br>misuse | 397531000006110 | [X]Ment/behav dis<br>due use vol<br>solvents: unsp<br>ment/behav dis  | substance<br>misuse |
| 397141000006111 | [X]Men & beh dis<br>due cocaine: resid &<br>late-onset psychot<br>dis    | substance<br>misuse | 397541000006117 | [X]Ment/behav dis<br>mlti drug use/oth<br>psyc sbs: psychotc<br>dis   | substance<br>misuse |
| 397161000006110 | [X]Men & beh dis<br>due opioids: resid &<br>late-onset psychot<br>dis    | substance<br>misuse | 397581000006111 | [X]Mental & behav<br>dis due to<br>cannabinoids:<br>psychotic disordr | substance<br>misuse |
| 397191000006119 | [X]Men & beh dis vol<br>solvents: withdrawal<br>state wth delirium       | substance<br>misuse | 397591000006114 | [X]Mental & behav<br>dis due to<br>hallucinogens:<br>psychotic disord | substance<br>misuse |
| 397201000006116 | [X]Men & behav dis<br>due alcoh: resid &<br>late-onset psychot<br>dis    | substance<br>misuse | 397601000006118 | [X]Mental & behav<br>dis due to<br>seds/hypntcs:<br>psychotic disordr | substance<br>misuse |
| 397211000006118 | [X]Men & behav dis<br>due alcoh:<br>withdrawl state with<br>delirium     | substance<br>misuse | 397611000006115 | [X]Mental & behav<br>dis due to use<br>alcohol: acute<br>intoxication | substance<br>misuse |
| 397231000006112 | [X]Men & behav dis<br>due opioid:<br>withdrawl state with<br>delirium    | substance<br>misuse | 397621000006111 | [X]Mental & behav<br>dis due to use<br>alcohol: psychotic<br>disorder | substance<br>misuse |
| 397241000006119 | [X]Men & behav dis<br>due to use alcohol:<br>oth men & behav dis         | substance<br>misuse | 397641000006116 | [X]Mental & behav<br>dis due to use<br>cocaine: psychotic<br>disorder | substance<br>misuse |
| 397261000006115 | [X]Men & behav dis<br>due to use opioids:<br>oth men & behav dis         | substance<br>misuse | 397661000006117 | [X]Mental & behav<br>dis due to use<br>opioids: psychotic<br>disorder | substance<br>misuse |
| 397291000006111 | [X]Men & behav<br>disorder multiple<br>drug<br>use/psychoactive<br>subst | substance<br>misuse | 397691000006113 | [X]Mental & behav<br>dis due to vol<br>solvents: psychotic<br>disordr | substance<br>misuse |
| 397301000006112 | [X]Men/beh dis mlt<br>drg use/oth psy sbs:<br>oth men & behav dis        | substance<br>misuse | 397711000006111 | [X]Mental & behav<br>disorder due other<br>stimulants inc<br>caffein  | substance<br>misuse |
| 397311000006110 | [X]Men/beh dis mlt<br>drg use/oth subs:<br>resid/late psychot<br>dis     | substance<br>misuse | 397721000006115 | [X]Mental & behav<br>disorders due to use<br>of volatile solvents     | substance<br>misuse |
| 397321000006119 | [X]Men/behav dis<br>due to use<br>cannabinoids: oth<br>men/behav disd    | substance<br>misuse | 397731000006117 | [X]Mental and behav<br>dis due<br>cannabinoids:<br>withdrawal state   | substance<br>misuse |
| 397431000006111 | [X]Ment & behav dis<br>due use alcohol:<br>unsp ment & behav<br>dis      | substance<br>misuse | 397741000006110 | [X]Mental and behav<br>dis due<br>hallucinogens:<br>withdrawal state  | substance<br>misuse |
| 397451000006116 | [X]Ment & behav dis<br>due use opioids:<br>unsp ment & behav<br>dis      | substance<br>misuse | 397751000006112 | [X]Mental and behav<br>dis due<br>seds/hypntcs:<br>withdrawal state   | substance<br>misuse |
| 980181000006113 | [X]Ment behav dis<br>due crack cocaine:<br>unsp ment and<br>behav dis    | substance<br>misuse | 397761000006114 | [X]Mental and behav<br>dis due to<br>cannabinoids:<br>dependence synd | substance<br>misuse |
| 397471000006114 | [X]Ment/beh dis<br>multi drug use/oth<br>psy sbs unsp<br>mnt/beh dis     | substance<br>misuse |                 |                                                                       |                     |
| 397481000006112 | [X]Ment/beh dis oth<br>stims inc caffeine:                               | substance<br>misuse |                 |                                                                       |                     |

|                 |                                                               |                  |                 |                                                              |                  |
|-----------------|---------------------------------------------------------------|------------------|-----------------|--------------------------------------------------------------|------------------|
| 397771000006119 | [X]Mental and behav dis due to hallucinogens: dependence synd | substance misuse | 398051000006113 | [X]Mental and behav dis mlti drg/oth psychoa sbs: harmfl use | substance misuse |
| 397781000006116 | [X]Mental and behav dis due to sedts/hypntcs: dependence synd | substance misuse | 398061000006110 | [X]Mental and behav dis mlti/oth psych sbs: dependence syndr | substance misuse |
| 397791000006118 | [X]Mental and behav dis due to use alcohol: amnesic syndrome  | substance misuse | 398071000006115 | [X]Mental and behav dis mlti/oth psychoa sbs: withdrwl state | substance misuse |
| 397801000006117 | [X]Mental and behav dis due to use alcohol: dependence syndr  | substance misuse | 398081000006117 | [X]Mental and behav dis oth stim inc caffein: dependnce synd | substance misuse |
| 397811000006119 | [X]Mental and behav dis due to use alcohol: withdrawal state  | substance misuse | 398111000006111 | [X]Mental and behavioural dis due use sedatives/hypnotics    | substance misuse |
| 397821000006110 | [X]Mental and behav dis due to use cannabinoids: amnesic syn  | substance misuse | 398141000006110 | [X]Mental and behavioural disorders due to psychoactive subs | substance misuse |
| 397831000006113 | [X]Mental and behav dis due to use cannabinoids: harmful use  | substance misuse | 398151000006112 | [X]Mental and behavioural disorders due to use cannabinoids  | substance misuse |
| 397851000006118 | [X]Mental and behav dis due to use cocaine: dependence syndr  | substance misuse | 398161000006114 | [X]Mental and behavioural disorders due to use hallucinogens | substance misuse |
| 397861000006116 | [X]Mental and behav dis due to use cocaine: withdrawal state  | substance misuse | 295765017       | [X]Mental and behavioural disorders due to use of alcohol    | substance misuse |
| 397871000006111 | [X]Mental and behav dis due to use hallucinogens: harmfl use  | substance misuse | 295877018       | [X]Mental and behavioural disorders due to use of cocaine    | substance misuse |
| 397881000006114 | [X]Mental and behav dis due to use of alcohol: harmful use    | substance misuse | 295803018       | [X]Mental and behavioural disorders due to use of opioids    | substance misuse |
| 397891000006112 | [X]Mental and behav dis due to use of cocaine: harmful use    | substance misuse | 980081000006112 | [X]Mental and behavioural disorders due use of crack cocaine | substance misuse |
| 397901000006111 | [X]Mental and behav dis due to use of opioids: harmful use    | substance misuse | 980141000006119 | [X]Mental behav disord due crack cocaine: psychotic disorder | substance misuse |
| 397921000006118 | [X]Mental and behav dis due to use opioids: amnesic syndrome  | substance misuse | 980121000006114 | [X]Mental behav disord due crack cocaine: withdrawal state   | substance misuse |
| 397931000006115 | [X]Mental and behav dis due to use opioids: dependence syndr  | substance misuse | 980111000006118 | [X]Mental behav disorders due use crack cocaine: depend synd | substance misuse |
| 397941000006113 | [X]Mental and behav dis due to use opioids: withdrawal state  | substance misuse | 980101000006116 | [X]Mental behav disorders due use crack cocaine: harmful use | substance misuse |
| 397961000006112 | [X]Mental and behav dis due to use sedts/hypntcs: harmful use | substance misuse | 398261000006119 | [X]Mental/behav dis multi drg use/oth psy sbs: amnesic syndr | substance misuse |
| 398011000006112 | [X]Mental and behav dis due to vol solvents: dependence synd  | substance misuse | 398691000006112 | [X]Mnt/bh dis due cannabinds: resid & late-onset psychot dis | substance misuse |
| 398041000006111 | [X]Mental and behav dis due volatile solvents: harmful use    | substance misuse | 398701000006112 | [X]Mnt/bh dis due hallucngns: resid & late-onset psychot dis | substance misuse |

|                 |                                                                                                     |                     |                 |                                                                              |                     |
|-----------------|-----------------------------------------------------------------------------------------------------|---------------------|-----------------|------------------------------------------------------------------------------|---------------------|
| 398721000006119 | <input checked="" type="checkbox"/> Mnt/bh dis mlti<br>drg use/oth psy sbs:<br>wthdr state + dlrium | substance<br>misuse | 423031000006112 | <input checked="" type="checkbox"/> Post hallucinogen<br>perception disorder | substance<br>misuse |
|-----------------|-----------------------------------------------------------------------------------------------------|---------------------|-----------------|------------------------------------------------------------------------------|---------------------|

**eTable 7. ICD-10 Codes and Categories Used for Identifying Psychiatric Illnesses in HES**

| Category              | ICD-10 code |                        |       |                        |     |
|-----------------------|-------------|------------------------|-------|------------------------|-----|
| sleep disorders       | G47         | affective disorders    | F31   | schizophrenia spectrum | F24 |
| sleep disorders       | F51         | affective disorders    | F32   | schizophrenia spectrum | F25 |
| sleep disorders       | Z72.82      | affective disorders    | F33   | schizophrenia spectrum | F28 |
| sleep disorders       | G25.81      | affective disorders    | F34   | schizophrenia spectrum | F29 |
| anxiety&neurosis      | F40         | affective disorders    | F35   | substance misuse       | F10 |
| anxiety&neurosis      | F41         | affective disorders    | F36   | substance misuse       | F11 |
| anxiety&neurosis      | F42         | affective disorders    | F37   | substance misuse       | F12 |
| anxiety&neurosis      | F43         | affective disorders    | F38   | substance misuse       | F13 |
| anxiety&neurosis      | F44         | affective disorders    | F39   | substance misuse       | F14 |
| anxiety&neurosis      | F45         | affective disorders    | F53.0 | substance misuse       | F15 |
| anxiety&neurosis      | F46         | schizophrenia spectrum | F20   | substance misuse       | F16 |
| anxiety&neurosis      | F47         | schizophrenia spectrum | F21   | substance misuse       | F17 |
| anxiety&neurosis      | F48         | schizophrenia spectrum | F22   | substance misuse       | F18 |
| personality disorders | F60         | schizophrenia spectrum | F23   | substance misuse       | F19 |
| personality disorders | F61         |                        |       | eating disorders       | F50 |
| personality disorders | F62         |                        |       |                        |     |
| personality disorders | F63         |                        |       |                        |     |
| personality disorders | F68         |                        |       |                        |     |
| personality disorders | F69         |                        |       |                        |     |
| affective disorders   | F30         |                        |       |                        |     |
